# Supplementary material for: Global Burden and Trends of Cardiovascular Disease Attributable to Low Vegetable Intake: A GBD 1990–2021 Analysis and Projection to 2035
Source: Research Square preprint supplement (doi:10.21203/rs.3.rs-8349669/v1), 2025-12-19

**Additional file 1**

**Contents**

**Tables**

Table 1：The prevalence of cardiovascular diseases in different regions from 1990 to 2021

Table 2：The death of cardiovascular diseases in different regions from 1990 to 2021

Table 3：The DALY of cardiovascular diseases in different regions from 1990 to 2021

Table 4：Cardiovascular disease mortality attributable to a diet low in vegetables in 204 countries from 1990 to 2021

Table 5：Cardiovascular disease DALY attributable to a diet low in vegetables in 204 countries from 1990 to 2021

Table 6：Cardiovascular disease mortality attributable to a diet low in vegetables by region from1990 to 2021

Table 7：Cardiovascular disease DALY attributable to a diet low in vegetables by region from1990 to 2021

Table 8：Cardiovascular disease mortality attributable to a diet low in vegetables among males by region from1990 to 2021

Table 9：Cardiovascular disease mortality attributable to a diet low in vegetables among females by region from1990 to 2021

Table 10：Cardiovascular disease DALY attributable to a diet low in vegetables among males by region from1990 to 2021

Table 11：Cardiovascular disease DALY attributable to a diet low in vegetables among females by region from1990 to 2021

Table 12：Stroke mortality attributable to a diet low in vegetables from 1990 to 2021

Table 13：Stroke DALY attributable to a diet low in vegetables from 1990 to 2021

Table 14：Ischemic heart disease mortality attributable to a diet low in vegetables from 1990 to 2021

Table 15：Ischemic heart disease DALY attributable to a diet low in vegetables from 1990 to 2021

Table 16：Lower extremity peripheral arterial disease mortality attributable to a diet low in vegetables from 1990 to 2021

Table 17：Lower extremity peripheral arterial disease DALY attributable to a diet low in vegetables from 1990 to 2021

Table 18：Hypertensive heart disease mortality attributable to a diet low in vegetables from 1990 to 2021

Table 19：Hypertensive heart disease DALY attributable to a diet low in vegetables from 1990 to 2021

Table 20：Aortic aneurysm mortality attributable to a diet low in vegetables from 1990 to 2021

Table 21：Aortic aneurysm DALY attributable to a diet low in vegetables from 1990 to 2021

**Figures**

Fig 1：Global cardiovascular disease attributable to a diet low in vegetables across 204 countries from 1990 to 2021

Fig 2：Cardiovascular disease attributable to a diet low in vegetables in age groups 20-54 and ≥55 years from 1990 to 2021

Fig 3：Cardiovascular disease attributable to a diet low in vegetables by SDI region from 1990 to 2021

Fig 4：Sex- and age-specific cardiovascular disease attributable to a diet low in vegetables globally in 1990 and 2021

Fig 5：Disease-specific death attributable to a diet low in vegetables by age and sex globally in 1990 and 2021

Fig 6：Disease-specific DALY attributable to a diet low in vegetables by age and sex globally in 1990 and 2021

Fig 7：Proportion of disease-specific death attributable to a diet low in vegetables by age group in 1990 and 2021

Fig 8：Proportion of disease-specific DALY attributable to a diet low in vegetables by age group in 1990 and 2021

Fig 9：Projected cardiovascular disease death number attributable to a diet low in vegetables by gender and age from 1990 to 2035

Fig 10：Projected cardiovascular disease death rate attributable to a diet low in vegetables by gender and age from 1990 to 2035

Fig 11：Projected cardiovascular disease mortality attributable to a diet low in vegetables by gender from 1990 to 2035

Table 1：The prevalence of cardiovascular diseases in different regions from 1990 to 2021

|  | Number | | PC | EAPC | Rate | | PC | EAPC |
| --- | --- | --- | --- | --- | --- | --- | --- | --- |
| location | 1990 | 2021 | 1990-2021 | 1990-2021 | 1990 | 2021 | 1990-2021 | 1990-2021 |
| Global | 289550232.015(270659430.742-305371954.415) | 612059321.647(570319527.808-649806888.829) | 1.114(1.076-1.155) | 2.47(2.43,2.51) | 7116.054(6668.139-7482.018) | 7178.733(6696.148-7620.665) | 0.009(-0.006-0.027) | 0.02(0.01,0.04) |
| High SDI | 80350937.300(75748386.024-84752974.203) | 133551149.040(126027517.283-140825639.715) | 0.662(0.633-0.695) | 1.69(1.64,1.73) | 7388.754(6965.966-7804.624) | 6836.321(6438.054-7220.736) | -0.075(-0.092--0.057) | -0.25(-0.28,-0.22) |
| High-middle SDI | 68300358.051(64116408.408-72025763.905) | 133708687.057(124693476.868-142382206.808) | 0.958(0.918-1.005) | 2.16(2.14,2.18) | 6935.642(6522.156-7306.951) | 6954.119(6495.440-7391.037) | 0.003(-0.015-0.023) | -0.02(-0.03,-0.01) |
| Middle SDI | 73298818.233(68008828.315-78175040.511) | 185282136.830(171839333.555-198562375.146) | 1.528(1.451-1.609) | 3.08(3.04,3.13) | 6542.859(6111.065-6940.131) | 6986.960(6485.001-7482.171) | 0.068(0.050-0.092) | 0.23(0.21,0.24) |
| Low-middle SDI | 47591969.912(43957411.029-50984382.656) | 112606600.634(103904686.288-121313123.750) | 1.366(1.321-1.416) | 2.86(2.82,2.90) | 7146.525(6639.190-7633.037) | 7483.441(6931.032-8031.083) | 0.047(0.030-0.067) | 0.15(0.13,0.16) |
| Low SDI | 19679418.287(17970583.969-21263619.453) | 46376620.801(42181464.451-50391541.882) | 1.357(1.324-1.393) | 2.84(2.78,2.90) | 7377.858(6820.856-7894.999) | 7428.515(6862.970-7975.736) | 0.007(-0.009-0.025) | 0.00(-0.01,0.02) |
| African Union | 27860909.399(25638654.787-30044558.379) | 66238229.909(60649672.647-71567859.070) | 1.377(1.343-1.411) | 2.80(2.75,2.85) | 8198.001(7616.143-8749.951) | 8340.847(7749.078-8905.869) | 0.017(0.003-0.031) | 0.03(0.02,0.04) |
| Association of Southeast Asian Nations | 14821736.814(13946295.533-15594615.517) | 36779815.418(34356620.380-38839322.612) | 1.481(1.440-1.525) | 2.97(2.95,2.99) | 5683.043(5364.183-5981.328) | 5824.510(5454.282-6144.919) | 0.025(0.014-0.036) | 0.09(0.08,0.11) |
| Central Europe, Eastern Europe, and Central Asia | 35513064.278(33287160.191-37622424.246) | 49198853.353(45770456.436-52329324.616) | 0.385(0.360-0.413) | 1.00(0.96,1.04) | 7642.905(7170.634-8081.094) | 7787.854(7273.936-8269.029) | 0.019(0.003-0.037) | 0.03(0.01,0.04) |
| Commonwealth | 66612636.881(61306446.588-71658283.731) | 158689621.446(145594251.049-171595003.645) | 1.382(1.329-1.444) | 2.90(2.85,2.95) | 7237.248(6710.811-7746.911) | 7428.430(6818.211-8025.886) | 0.026(0.005-0.051) | 0.08(0.07,0.10) |
| European Union | 43723248.786(41294760.064-46069071.605) | 62126816.710(58257881.456-65589523.189) | 0.421(0.391-0.453) | 1.20(1.18,1.22) | 7459.872(7040.077-7856.548) | 6926.869(6478.488-7353.033) | -0.071(-0.093--0.050) | -0.22(-0.25,-0.20) |
| Four World Regions | 288975038.647(270104186.450-304771123.764) | 611023985.276(569338675.638-648727234.344) | 1.114(1.077-1.156) | 2.47(2.43,2.51) | 7116.496(6668.432-7482.430) | 7178.807(6696.004-7621.018) | 0.009(-0.006-0.027) | 0.02(0.01,0.04) |
| G20 | 215446247.091(201057856.081-227036396.672) | 441636085.467(410561607.411-471635598.317) | 1.050(1.005-1.100) | 2.37(2.33,2.41) | 6999.646(6561.380-7373.550) | 6945.603(6465.959-7413.650) | -0.008(-0.025-0.013) | -0.03(-0.04,-0.01) |
| Gulf Cooperation Council | 821422.986(781671.367-864825.151) | 3752857.802(3491404.142-4034722.785) | 3.569(3.412-3.743) | 5.02(4.88,5.16) | 9128.727(8716.962-9574.837) | 10166.266(9585.840-10768.837) | 0.114(0.084-0.144) | 0.41(0.37,0.45) |
| Health System Grouping Levels | 289221501.782(270345036.214-305029118.803) | 611525194.362(569812247.874-649245662.877) | 1.114(1.076-1.156) | 2.47(2.43,2.51) | 7115.779(6667.863-7481.750) | 7178.714(6696.015-7620.743) | 0.009(-0.006-0.027) | 0.02(0.01,0.04) |
| High-income | 85585556.309(80658404.988-90269836.923) | 136630901.548(128735913.175-144278122.554) | 0.596(0.564-0.632) | 1.55(1.51,1.58) | 7293.799(6879.927-7690.145) | 6759.416(6358.808-7164.756) | -0.073(-0.093--0.050) | -0.25(-0.28,-0.22) |
| Latin America and Caribbean | 16767893.895(15594879.531-17859752.101) | 41500760.395(38467779.399-44295316.699) | 1.475(1.405-1.556) | 3.01(2.99,3.03) | 6658.044(6213.636-7013.378) | 6702.978(6217.104-7146.567) | 0.007(-0.011-0.026) | 0.02(-0.02,0.05) |
| League of Arab States | 11168809.866(10631251.886-11729395.880) | 30848342.618(29031306.043-32632936.943) | 1.762(1.687-1.833) | 3.34(3.30,3.38) | 9621.481(9169.040-10040.675) | 10107.445(9573.420-10651.358) | 0.051(0.027-0.074) | 0.17(0.15,0.18) |
| Nordic Region | 2600335.040(2445915.167-2747198.999) | 3532355.761(3319547.956-3746073.193) | 0.358(0.330-0.389) | 0.96(0.86,1.07) | 7212.821(6769.477-7642.695) | 6567.387(6134.670-6983.892) | -0.089(-0.108--0.068) | -0.33(-0.37,-0.29) |
| North Africa and Middle East | 17770572.732(16906660.546-18654829.365) | 47397897.469(44551821.184-50454610.291) | 1.667(1.602-1.736) | 3.21(3.18,3.24) | 9660.056(9201.263-10122.836) | 9882.648(9335.514-10467.459) | 0.023(-0.000-0.045) | 0.06(0.05,0.07) |
| OECD Countries | 97600020.196(92056905.101-102779893.761) | 160902672.853(151417823.059-169661613.473) | 0.649(0.619-0.683) | 1.65(1.61,1.68) | 7382.269(6960.889-7781.222) | 6818.741(6400.068-7198.706) | -0.076(-0.094--0.057) | -0.28(-0.31,-0.25) |
| Organization of Islamic Cooperation | 45493291.884(42727567.156-47900872.632) | 113583075.921(105962548.861-120985703.742) | 1.497(1.455-1.540) | 3.00(2.94,3.06) | 7998.851(7528.907-8422.439) | 8310.572(7803.109-8779.694) | 0.039(0.024-0.055) | 0.12(0.12,0.13) |
| Sahel Region | 6173528.664(5635156.904-6699378.758) | 15080663.757(13695564.168-16490948.014) | 1.443(1.393-1.498) | 2.90(2.82,2.99) | 8097.525(7451.381-8743.525) | 8097.413(7453.688-8751.189) | -0.000(-0.016-0.016) | -0.04(-0.05,-0.02) |
| South Asia | 43469224.574(39750630.774-47182806.678) | 112650044.706(102341774.960-123863264.031) | 1.591(1.522-1.675) | 3.21(3.17,3.25) | 7070.812(6479.734-7688.835) | 7419.919(6732.272-8143.327) | 0.049(0.025-0.080) | 0.16(0.15,0.17) |
| Southeast Asia, East Asia, and Oceania | 70059633.412(64932161.097-74326991.526) | 177226456.860(164344689.613-189986218.006) | 1.530(1.449-1.616) | 3.07(3.03,3.11) | 5946.899(5550.712-6294.315) | 6415.068(5979.576-6835.798) | 0.079(0.060-0.104) | 0.26(0.24,0.29) |
| Sub-Saharan Africa | 20384286.815(18471045.030-22294602.130) | 47454407.315(42792275.819-52269268.720) | 1.328(1.296-1.363) | 2.72(2.67,2.78) | 7696.374(7067.147-8319.859) | 7594.232(6994.262-8222.913) | -0.013(-0.026-0.000) | -0.08(-0.10,-0.06) |
| WHO region | 287913179.548(269079650.806-303662150.339) | 608320368.816(566800624.075-645906305.838) | 1.113(1.075-1.154) | 2.47(2.42,2.51) | 7118.073(6669.333-7484.451) | 7180.609(6697.319-7623.543) | 0.009(-0.006-0.027) | 0.02(0.01,0.04) |
| World Bank Regions | 289091819.999(270219144.463-304895287.795) | 611306211.834(569602813.770-649014635.729) | 1.115(1.077-1.156) | 2.47(2.43,2.51) | 7115.825(6667.861-7481.813) | 7178.817(6696.010-7620.936) | 0.009(-0.006-0.027) | 0.02(0.01,0.04) |

Table 2：The deaths of cardiovascular diseases in different regions from 1990 to 2021

|  | Number | | PC | EAPCs | Rate | | PC | EAPCs |
| --- | --- | --- | --- | --- | --- | --- | --- | --- |
| location | 1990 | 2021 | 1990-2021 | 1990-2021 | 1990 | 2021 | 1990-2021 | 1990-2021 |
| Global | 12330009.301(11626404.987-12787471.591) | 19414853.088(17775807.464-20668512.494) | 0.575(0.483-0.671) | 1.39(1.35,1.43) | 358.122(333.741-372.629) | 235.181(214.636-250.521) | -0.343(-0.378--0.307) | -1.46(-1.52,-1.41) |
| High SDI | 3068129.442(2812106.707-3182090.369) | 2915728.767(2508058.973-3128618.015) | -0.050(-0.113--0.014) | -0.32(-0.44,-0.21) | 279.293(255.039-290.502) | 120.676(106.198-128.349) | -0.568(-0.587--0.556) | -2.88(-2.98,-2.78) |
| High-middle SDI | 3623409.564(3426829.200-3766722.931) | 5064431.468(4543851.254-5476622.440) | 0.398(0.286-0.513) | 0.83(0.65,1.02) | 433.572(403.501-451.993) | 263.913(235.960-285.615) | -0.391(-0.435--0.343) | -1.85(-2.06,-1.64) |
| Middle SDI | 3075367.760(2863825.152-3278008.521) | 6344628.423(5787321.949-6879029.954) | 1.063(0.870-1.305) | 2.38(2.32,2.43) | 368.926(339.382-393.453) | 268.134(242.459-290.671) | -0.273(-0.338--0.194) | -1.04(-1.09,-0.99) |
| Low-middle SDI | 1856725.416(1731444.831-1963813.380) | 3824731.360(3556182.874-4079680.717) | 1.060(0.911-1.236) | 2.45(2.39,2.50) | 345.386(319.250-367.351) | 299.559(277.532-318.969) | -0.133(-0.195--0.056) | -0.41(-0.45,-0.36) |
| Low SDI | 688215.591(631318.569-746087.484) | 1244981.653(1131577.416-1364117.447) | 0.809(0.660-0.961) | 1.93(1.83,2.04) | 352.111(319.599-380.919) | 291.987(266.558-318.274) | -0.171(-0.235--0.104) | -0.59(-0.68,-0.49) |
| African Union | 965314.025(905173.958-1016820.836) | 1737929.899(1567537.595-1897166.429) | 0.800(0.654-0.965) | 1.88(1.84,1.93) | 404.599(376.453-427.203) | 334.048(302.028-362.511) | -0.174(-0.239--0.102) | -0.63(-0.68,-0.57) |
| Association of Southeast Asian Nations | 748049.518(676972.340-813269.373) | 1664045.619(1508941.884-1798533.140) | 1.225(0.967-1.527) | 2.59(2.52,2.65) | 353.807(316.573-387.404) | 302.619(272.866-325.719) | -0.145(-0.240--0.023) | -0.51(-0.62,-0.41) |
| Central Europe, Eastern Europe, and Central Asia | 2334434.098(2236459.124-2379092.047) | 2466092.569(2275962.728-2628150.270) | 0.056(-0.002-0.116) | -0.22(-0.50,0.06) | 555.452(526.456-568.599) | 376.078(347.136-400.712) | -0.323(-0.357--0.286) | -1.70(-2.04,-1.36) |
| Commonwealth | 2389601.024(2207105.119-2525003.573) | 4677648.047(4356730.755-4991244.731) | 0.958(0.796-1.128) | 2.24(2.15,2.34) | 315.553(289.344-334.628) | 250.401(232.722-267.351) | -0.206(-0.265--0.138) | -0.74(-0.82,-0.66) |
| European Union | 1979659.748(1835226.885-2044755.602) | 1654607.886(1439208.173-1773526.332) | -0.164(-0.225--0.130) | -0.67(-0.75,-0.59) | 331.403(305.920-343.349) | 141.283(125.136-150.384) | -0.574(-0.595--0.559) | -2.89(-2.96,-2.82) |
| Four World Regions | 12302785.365(11600579.119-12759764.449) | 19385181.031(17748930.868-20638032.725) | 0.576(0.484-0.673) | 1.39(1.35,1.44) | 358.115(333.719-372.641) | 235.307(214.752-250.670) | -0.343(-0.378--0.307) | -1.46(-1.52,-1.41) |
| G20 | 9134399.199(8570426.529-9523594.752) | 13966726.796(12560256.778-15067763.724) | 0.529(0.411-0.655) | 1.31(1.26,1.35) | 344.113(318.507-359.019) | 218.135(195.800-235.274) | -0.366(-0.411--0.318) | -1.56(-1.61,-1.51) |
| Gulf Cooperation Council | 30955.495(24995.562-37363.380) | 71176.753(60530.120-83815.013) | 1.299(0.812-2.017) | 2.65(2.58,2.72) | 466.192(376.108-559.406) | 306.621(267.816-347.993) | -0.342(-0.465--0.160) | -1.37(-1.54,-1.21) |
| Health System Grouping Levels | 12311847.773(11609186.795-12768851.884) | 19394501.670(17756854.031-20647062.578) | 0.575(0.484-0.672) | 1.39(1.35,1.44) | 358.004(333.622-372.517) | 235.152(214.607-250.492) | -0.343(-0.378--0.307) | -1.46(-1.52,-1.41) |
| High-income | 3165240.148(2883372.680-3292865.949) | 2883088.086(2438129.762-3112984.052) | -0.089(-0.159--0.054) | -0.45(-0.57,-0.33) | 264.102(239.719-275.485) | 110.081(95.376-117.530) | -0.583(-0.603--0.573) | -2.98(-3.09,-2.87) |
| Latin America and Caribbean | 548392.425(522410.146-560817.574) | 964740.887(874141.330-1035163.097) | 0.759(0.649-0.872) | 1.84(1.73,1.94) | 281.667(264.566-289.510) | 160.950(145.490-172.741) | -0.429(-0.461--0.394) | -1.86(-1.98,-1.74) |
| League of Arab States | 507461.442(467809.430-542279.081) | 953169.758(830044.641-1079518.132) | 0.878(0.664-1.119) | 2.06(1.99,2.12) | 571.287(521.321-608.138) | 437.154(382.682-489.197) | -0.235(-0.315--0.144) | -0.86(-0.88,-0.84) |
| Nordic Region | 120368.267(110590.717-125049.533) | 76861.978(64866.654-83645.629) | -0.361(-0.417--0.328) | -1.57(-1.61,-1.52) | 299.178(275.646-310.623) | 110.180(94.572-119.156) | -0.632(-0.658--0.615) | -3.27(-3.32,-3.23) |
| North Africa and Middle East | 750006.034(698870.807-796221.328) | 1354625.624(1210244.299-1496618.134) | 0.806(0.645-0.990) | 1.98(1.89,2.06) | 529.231(486.443-560.617) | 363.478(322.345-397.264) | -0.313(-0.371--0.250) | -1.22(-1.29,-1.15) |
| OECD Countries | 3718575.078(3411209.675-3859144.018) | 3599639.599(3097289.476-3860240.706) | -0.032(-0.097-0.004) | -0.24(-0.37,-0.11) | 280.550(256.114-291.993) | 122.768(107.786-130.654) | -0.562(-0.581--0.550) | -2.83(-2.95,-2.72) |
| Organization of Islamic Cooperation | 1874528.213(1752991.269-1974238.101) | 3681732.170(3406863.143-3946866.227) | 0.964(0.829-1.120) | 2.18(2.15,2.21) | 420.940(388.370-445.918) | 354.984(325.805-378.294) | -0.157(-0.213--0.086) | -0.59(-0.66,-0.53) |
| Sahel Region | 228166.820(205551.974-250755.830) | 367458.995(323307.061-408741.865) | 0.610(0.412-0.847) | 1.46(1.38,1.55) | 405.117(366.443-443.952) | 319.313(288.010-352.941) | -0.212(-0.302--0.108) | -0.85(-0.91,-0.79) |
| South Asia | 1554654.693(1402490.361-1674221.669) | 3666331.022(3381321.531-3957645.153) | 1.358(1.104-1.620) | 2.92(2.81,3.03) | 302.469(271.069-326.804) | 278.140(256.531-299.598) | -0.080(-0.177-0.026) | -0.21(-0.32,-0.10) |
| Southeast Asia, East Asia, and Oceania | 3367452.131(3048334.546-3670484.082) | 6977309.858(6142161.274-7822582.263) | 1.072(0.789-1.422) | 2.41(2.33,2.49) | 385.941(349.326-419.985) | 284.346(248.719-318.641) | -0.263(-0.359--0.145) | -0.93(-1.09,-0.77) |
| Sub-Saharan Africa | 609829.771(561026.376-655175.374) | 1102665.041(995276.606-1217103.065) | 0.808(0.642-1.004) | 1.83(1.77,1.90) | 338.326(309.011-364.061) | 284.757(258.432-311.090) | -0.158(-0.229--0.075) | -0.64(-0.72,-0.55) |
| WHO region | 12271384.323(11570462.859-12728284.852) | 19345929.351(17712274.968-20595591.681) | 0.577(0.485-0.674) | 1.39(1.35,1.44) | 358.496(334.050-373.056) | 236.089(215.441-251.497) | -0.341(-0.376--0.305) | -1.46(-1.51,-1.40) |
| World Bank Regions | 12302566.092(11600294.303-12759258.499) | 19381139.067(17744534.458-20633111.632) | 0.575(0.484-0.672) | 1.39(1.35,1.44) | 357.914(333.530-372.426) | 235.067(214.530-250.405) | -0.343(-0.378--0.307) | -1.46(-1.52,-1.41) |

Table 3：The DALY of cardiovascular diseases in different regions from 1990 to 2021

|  | Number | | PC | EAPCs | Rate | | PC | EAPCs |
| --- | --- | --- | --- | --- | --- | --- | --- | --- |
| location | 1990 | 2021 | 1990-2021 | 1990-2021 | 1990 | 2021 | 1990-2021 | 1990-2021 |
| Global | 297507308.433(284600934.833-309345618.514) | 428327412.284(403683550.411-453711663.431) | 0.440(0.358-0.522) | 1.09(1.04,1.13) | 7550.168(7181.463-7861.993) | 5055.864(4759.549-5359.165) | -0.330(-0.365--0.294) | -1.42(-1.47,-1.36) |
| High SDI | 59840124.166(56518437.745-62029530.341) | 53384546.794(48351709.154-57086143.368) | -0.108(-0.145--0.075) | -0.50(-0.62,-0.39) | 5494.185(5185.459-5699.977) | 2588.780(2388.026-2762.803) | -0.529(-0.545--0.513) | -2.57(-2.68,-2.47) |
| High-middle SDI | 79552322.256(75496470.081-82962332.105) | 97878833.474(89801819.461-105738655.672) | 0.230(0.136-0.331) | 0.36(0.12,0.59) | 8451.907(8001.628-8819.151) | 5105.078(4685.728-5507.534) | -0.396(-0.441--0.348) | -1.93(-2.17,-1.68) |
| Middle SDI | 81736385.689(76736379.690-87079930.445) | 142519012.571(132081340.039-152962109.301) | 0.744(0.597-0.924) | 1.81(1.76,1.85) | 7843.604(7348.288-8338.516) | 5505.131(5088.949-5901.316) | -0.298(-0.357--0.225) | -1.17(-1.21,-1.14) |
| Low-middle SDI | 55008142.076(51439492.214-58047504.309) | 98787647.848(92030849.873-105635894.954) | 0.796(0.666-0.947) | 1.98(1.93,2.03) | 8149.905(7607.660-8594.905) | 6744.441(6289.074-7198.729) | -0.172(-0.230--0.103) | -0.58(-0.61,-0.55) |
| Low SDI | 20968132.605(19071303.486-22956100.915) | 35335445.458(31846845.258-39118035.376) | 0.685(0.537-0.834) | 1.64(1.55,1.74) | 8236.257(7566.486-8920.548) | 6474.721(5883.171-7124.508) | -0.214(-0.277--0.151) | -0.83(-0.91,-0.76) |
| African Union | 28503058.343(26857248.657-30166016.755) | 46944586.678(41945061.226-52118194.411) | 0.647(0.506-0.811) | 1.59(1.55,1.64) | 8939.979(8408.755-9436.959) | 6969.428(6277.967-7649.638) | -0.220(-0.281--0.151) | -0.83(-0.89,-0.78) |
| Association of Southeast Asian Nations | 21137257.388(19407125.195-22820181.527) | 42425107.815(38429432.231-46234628.766) | 1.007(0.783-1.228) | 2.27(2.22,2.31) | 8114.060(7371.113-8785.730) | 6735.555(6111.363-7291.641) | -0.170(-0.261--0.069) | -0.60(-0.68,-0.53) |
| Central Europe, Eastern Europe, and Central Asia | 48735288.402(47413377.776-49631080.035) | 47613117.393(44699537.685-50492834.726) | -0.023(-0.076-0.032) | -0.57(-0.94,-0.21) | 10767.951(10420.682-10983.101) | 7494.929(7035.354-7942.428) | -0.304(-0.340--0.265) | -1.67(-2.06,-1.27) |
| Commonwealth | 66654916.829(62096369.104-70446064.533) | 119971068.790(111749170.590-128505848.514) | 0.800(0.651-0.956) | 1.95(1.88,2.02) | 7274.263(6760.846-7676.550) | 5727.615(5350.971-6131.220) | -0.213(-0.279--0.145) | -0.78(-0.84,-0.72) |
| European Union | 37368572.299(35463564.787-38520605.598) | 27363761.960(24633159.759-29136662.925) | -0.268(-0.306--0.239) | -1.13(-1.20,-1.06) | 6342.308(6015.387-6539.998) | 2747.014(2514.783-2920.104) | -0.567(-0.583--0.551) | -2.86(-2.94,-2.79) |
| Four World Regions | 296914773.338(284023341.049-308738664.824) | 427725692.687(403127427.597-453066887.613) | 0.441(0.359-0.522) | 1.09(1.05,1.13) | 7550.613(7181.663-7862.655) | 5057.766(4761.168-5361.303) | -0.330(-0.365--0.294) | -1.41(-1.47,-1.35) |
| G20 | 213893702.501(203356119.635-223315466.237) | 295032092.372(275134161.850-314664001.755) | 0.379(0.285-0.489) | 0.96(0.91,1.00) | 7169.668(6780.613-7482.431) | 4638.499(4329.332-4940.882) | -0.353(-0.393--0.303) | -1.51(-1.57,-1.46) |
| Gulf Cooperation Council | 899953.972(730025.494-1083734.488) | 2330184.880(1948925.585-2793540.046) | 1.589(1.021-2.411) | 3.19(3.12,3.27) | 9922.500(8014.561-11934.048) | 6441.011(5631.514-7441.781) | -0.351(-0.477--0.168) | -1.35(-1.53,-1.17) |
| Health System Grouping Levels | 297105106.792(284207990.981-308933718.532) | 427905486.144(403283517.793-453266584.347) | 0.440(0.359-0.522) | 1.09(1.05,1.13) | 7548.157(7179.399-7860.031) | 5055.329(4758.924-5358.680) | -0.330(-0.365--0.294) | -1.41(-1.47,-1.36) |
| High-income | 60343894.697(56796061.963-62530712.642) | 50926549.399(45475540.859-54534809.160) | -0.156(-0.196--0.127) | -0.68(-0.80,-0.56) | 5114.155(4812.219-5304.279) | 2329.888(2140.000-2490.907) | -0.544(-0.557--0.531) | -2.67(-2.79,-2.56) |
| Latin America and Caribbean | 14143097.252(13721246.342-14515881.568) | 22231164.341(20724765.192-23900422.272) | 0.572(0.483-0.671) | 1.41(1.31,1.52) | 6113.625(5873.213-6275.868) | 3602.404(3352.119-3875.421) | -0.411(-0.443--0.374) | -1.80(-1.92,-1.68) |
| League of Arab States | 14902345.137(13912054.921-15848684.540) | 24358138.045(21059696.505-27958494.772) | 0.635(0.436-0.854) | 1.62(1.54,1.69) | 12377.294(11509.000-13196.600) | 8750.681(7606.251-9901.994) | -0.293(-0.372--0.205) | -1.13(-1.16,-1.11) |
| Nordic Region | 2166791.750(2040218.763-2241380.001) | 1252461.061(1118361.871-1357355.486) | -0.422(-0.458--0.392) | -1.87(-1.94,-1.80) | 5763.076(5453.429-5962.563) | 2074.402(1879.964-2243.492) | -0.640(-0.659--0.622) | -3.34(-3.37,-3.30) |
| North Africa and Middle East | 21342633.628(20071414.473-22683423.747) | 32979048.035(29306589.003-36634917.637) | 0.545(0.390-0.700) | 1.41(1.33,1.50) | 11421.795(10721.062-12113.695) | 7353.775(6598.625-8111.931) | -0.356(-0.415--0.293) | -1.46(-1.51,-1.42) |
| OECD Countries | 72654474.809(68603090.650-75141700.486) | 64788689.018(58750500.764-69211507.738) | -0.108(-0.147--0.078) | -0.51(-0.64,-0.38) | 5506.718(5192.812-5701.016) | 2580.641(2387.346-2744.897) | -0.531(-0.545--0.517) | -2.60(-2.73,-2.48) |
| Organization of Islamic Cooperation | 53039726.003(50235926.517-55557090.242) | 94644505.837(87241810.773-101904562.648) | 0.784(0.658-0.909) | 1.86(1.84,1.89) | 9383.714(8807.876-9866.374) | 7412.053(6852.446-7935.686) | -0.210(-0.263--0.152) | -0.81(-0.88,-0.75) |
| Sahel Region | 6817253.036(6170357.086-7476698.776) | 10802978.842(9336386.084-12207873.365) | 0.585(0.388-0.812) | 1.42(1.33,1.50) | 9209.313(8355.371-10065.281) | 6840.233(6043.745-7649.495) | -0.257(-0.344--0.154) | -1.05(-1.12,-0.99) |
| South Asia | 47373764.779(43286333.856-50779957.162) | 95358824.832(88177000.196-103033020.908) | 1.013(0.815-1.228) | 2.36(2.28,2.44) | 7379.853(6697.139-7927.068) | 6339.861(5860.422-6836.743) | -0.141(-0.231--0.049) | -0.47(-0.54,-0.39) |
| Southeast Asia, East Asia, and Oceania | 87585612.984(79827385.601-95441363.372) | 148017073.954(131443622.242-164253957.305) | 0.690(0.476-0.955) | 1.73(1.67,1.80) | 7991.236(7264.307-8683.773) | 5547.556(4913.419-6138.894) | -0.306(-0.390--0.202) | -1.16(-1.27,-1.04) |
| Sub-Saharan Africa | 17983016.690(16516060.939-19454335.503) | 31201634.330(27742229.641-35035162.679) | 0.735(0.578-0.916) | 1.69(1.63,1.76) | 7636.605(7065.540-8218.899) | 6140.063(5542.476-6772.744) | -0.196(-0.266--0.114) | -0.79(-0.87,-0.71) |
| WHO region | 296138502.631(283273842.146-307939674.863) | 426866279.879(402295495.322-452185386.352) | 0.441(0.360-0.523) | 1.09(1.05,1.13) | 7559.809(7190.168-7872.250) | 5072.085(4774.592-5376.872) | -0.329(-0.364--0.292) | -1.41(-1.47,-1.35) |
| World Bank Regions | 296907108.937(284014025.012-308730124.166) | 427654453.311(403057943.661-452990253.784) | 0.440(0.359-0.522) | 1.09(1.05,1.13) | 7546.572(7177.826-7858.456) | 5054.175(4757.841-5357.498) | -0.330(-0.365--0.294) | -1.41(-1.47,-1.36) |

Table 4：Cardiovascular disease mortality attributable to a diet low in vegetables in 204 countries from 1990 to 2021

|  | Number | | PC | EAPC | Rate | | PC | EAPC |
| --- | --- | --- | --- | --- | --- | --- | --- | --- |
| location | 1990 | 2021 | 1990-2021 | 1990-2021 | 1990 | 2021 | 1990-2021 | 1990-2021 |
| Afghanistan | 6958.270(3918.612-10023.374) | 7196.631(4198.675-10314.143) | 0.034(-0.181-0.382) | -0.25(-0.43,-0.07) | 113.338(66.234-162.774) | 82.205(49.866-115.886) | -0.275(-0.418--0.078) | -1.25(-1.47,-1.03) |
| Albania | 153.110(92.307-217.651) | 62.948(19.893-124.851) | -0.589(-0.844--0.302) | -3.90(-4.52,-3.28) | 8.891(5.368-12.700) | 1.703(0.555-3.357) | -0.808(-0.927--0.680) | -6.09(-6.59,-5.59) |
| Algeria | 2932.625(1959.800-4142.735) | 5323.746(3341.816-7555.648) | 0.815(0.363-1.424) | 1.86(1.72,2.00) | 36.561(24.916-50.248) | 21.228(13.442-30.523) | -0.419(-0.558--0.212) | -1.51(-1.65,-1.38) |
| American Samoa | 4.387(2.426-6.098) | 7.859(4.116-11.568) | 0.791(0.435-1.195) | 1.69(1.55,1.83) | 22.273(13.349-30.464) | 17.913(9.735-26.070) | -0.196(-0.368--0.014) | -0.79(-0.97,-0.60) |
| Andorra | 2.239(1.250-3.623) | 5.348(3.164-8.300) | 1.388(0.486-2.920) | 2.80(2.45,3.14) | 5.053(2.727-7.991) | 2.885(1.716-4.458) | -0.429(-0.637--0.077) | -1.51(-1.78,-1.24) |
| Angola | 2010.024(1196.110-2835.465) | 2595.403(1674.077-3593.743) | 0.291(-0.100-1.024) | 0.03(-0.31,0.38) | 62.850(40.304-85.926) | 31.444(20.011-43.246) | -0.500(-0.648--0.233) | -2.94(-3.21,-2.67) |
| Antigua and Barbuda | 13.287(10.073-16.895) | 21.780(17.145-26.980) | 0.639(0.360-1.005) | 1.72(1.24,2.19) | 23.560(18.102-29.966) | 23.907(18.641-30.154) | 0.015(-0.162-0.248) | 0.23(-0.15,0.61) |
| Argentina | 4871.739(3587.719-6211.716) | 4888.595(3709.930-6319.696) | 0.003(-0.180-0.217) | 0.34(0.14,0.54) | 16.413(12.069-20.920) | 8.389(6.384-10.838) | -0.489(-0.579--0.380) | -1.90(-2.12,-1.68) |
| Armenia | 149.252(72.451-248.053) | 26.847(2.128-78.750) | -0.820(-0.979--0.562) | -8.85(-10.20,-7.48) | 6.822(3.377-11.235) | 0.631(0.058-1.818) | -0.908(-0.988--0.786) | -10.57(-11.81,-9.31) |
| Australia | 1382.772(720.146-2054.822) | 1231.134(754.206-1753.320) | -0.110(-0.242-0.146) | -0.37(-0.57,-0.18) | 7.357(3.836-10.903) | 2.361(1.451-3.342) | -0.679(-0.722--0.600) | -3.62(-3.81,-3.42) |
| Austria | 1197.879(724.286-1683.850) | 1242.972(833.380-1690.339) | 0.038(-0.223-0.449) | 0.55(0.25,0.85) | 9.914(6.023-13.737) | 5.258(3.531-7.152) | -0.470(-0.589--0.299) | -1.75(-1.96,-1.54) |
| Azerbaijan | 678.351(410.018-1006.706) | 241.270(83.547-475.208) | -0.644(-0.845--0.428) | -5.31(-6.52,-4.09) | 16.195(10.095-24.081) | 3.392(1.208-6.743) | -0.791(-0.906--0.663) | -6.64(-7.72,-5.56) |
| Bahamas | 29.495(21.204-38.775) | 92.366(68.070-126.579) | 2.132(1.396-3.112) | 3.84(3.57,4.12) | 20.659(14.826-27.375) | 25.320(18.584-34.820) | 0.226(-0.049-0.622) | 0.70(0.42,0.98) |
| Bahrain | 18.106(10.158-27.465) | 26.995(13.548-43.425) | 0.491(-0.005-1.122) | 0.83(0.60,1.06) | 16.882(10.360-25.684) | 6.212(3.330-9.960) | -0.632(-0.774--0.442) | -3.51(-3.78,-3.25) |
| Bangladesh | 21284.472(9804.948-31451.105) | 29039.719(14208.799-45955.940) | 0.364(0.027-0.878) | 0.90(0.69,1.11) | 47.312(23.732-68.980) | 24.483(12.545-38.817) | -0.483(-0.620--0.267) | -2.36(-2.76,-1.95) |
| Barbados | 44.897(33.068-58.408) | 48.358(33.582-64.957) | 0.077(-0.143-0.340) | 0.22(-0.17,0.61) | 15.296(11.183-19.743) | 9.465(6.618-12.684) | -0.381(-0.504--0.233) | -1.35(-1.63,-1.06) |
| Belarus | 1488.009(746.404-2271.425) | 910.605(357.121-1621.528) | -0.388(-0.578--0.211) | -2.88(-3.58,-2.17) | 12.054(6.009-18.495) | 5.584(2.228-9.941) | -0.537(-0.681--0.398) | -3.82(-4.56,-3.08) |
| Belgium | 830.493(445.356-1255.593) | 415.668(241.189-646.937) | -0.499(-0.612--0.356) | -2.16(-2.28,-2.04) | 5.402(2.908-8.168) | 1.393(0.799-2.152) | -0.742(-0.793--0.681) | -4.36(-4.48,-4.24) |
| Belize | 16.140(11.142-21.452) | 44.976(34.416-56.697) | 1.787(1.315-2.488) | 3.73(3.40,4.07) | 17.419(12.071-23.163) | 16.352(12.474-20.525) | -0.061(-0.226-0.182) | 0.09(-0.15,0.33) |
| Benin | 328.277(218.197-455.513) | 637.149(429.214-898.029) | 0.941(0.407-1.634) | 2.30(2.16,2.44) | 18.063(12.033-25.077) | 14.378(9.613-20.287) | -0.204(-0.419-0.075) | -0.66(-0.73,-0.59) |
| Bermuda | 5.775(3.397-8.498) | 8.487(5.849-11.333) | 0.470(0.159-0.979) | 1.44(0.99,1.89) | 10.245(6.041-15.058) | 5.581(3.882-7.509) | -0.455(-0.566--0.270) | -1.87(-2.22,-1.53) |
| Bhutan | 48.859(26.288-73.169) | 78.776(50.935-111.544) | 0.612(0.196-1.391) | 1.59(1.44,1.74) | 24.510(13.708-36.219) | 14.356(9.397-20.226) | -0.414(-0.555--0.139) | -1.80(-1.95,-1.64) |
| Bolivia (Plurinational State of) | 619.076(370.323-891.241) | 1131.032(682.345-1643.523) | 0.827(0.397-1.458) | 2.33(2.22,2.44) | 23.218(14.150-32.976) | 14.656(9.026-21.219) | -0.369(-0.517--0.156) | -1.37(-1.43,-1.31) |
| Bosnia and Herzegovina | 374.930(226.000-539.512) | 305.843(160.211-481.277) | -0.184(-0.458-0.098) | -1.14(-1.47,-0.80) | 10.701(6.507-15.462) | 4.823(2.553-7.596) | -0.549(-0.700--0.388) | -3.09(-3.50,-2.67) |
| Botswana | 195.982(114.281-286.402) | 293.712(201.369-404.159) | 0.499(0.040-1.344) | 1.39(1.17,1.60) | 44.915(26.731-63.320) | 25.934(18.104-35.436) | -0.423(-0.593--0.103) | -1.56(-1.79,-1.33) |
| Brazil | 17411.611(11233.574-23129.399) | 20839.267(15064.944-26609.072) | 0.197(0.062-0.421) | 0.71(0.54,0.88) | 21.745(14.752-28.822) | 8.542(6.225-10.899) | -0.607(-0.649--0.549) | -2.89(-3.05,-2.73) |
| Brunei Darussalam | 14.466(9.684-19.436) | 25.419(17.500-34.442) | 0.757(0.432-1.190) | 2.01(1.71,2.31) | 16.804(11.820-22.427) | 10.554(7.492-13.830) | -0.372(-0.500--0.204) | -0.98(-1.27,-0.68) |
| Bulgaria | 1355.090(832.489-2045.058) | 2090.389(1098.323-3366.678) | 0.543(-0.018-1.355) | 1.08(0.58,1.59) | 14.317(8.513-21.774) | 15.484(8.445-24.323) | 0.081(-0.309-0.668) | -0.05(-0.63,0.53) |
| Burkina Faso | 1202.234(715.796-1667.568) | 2770.126(1585.305-3926.428) | 1.304(0.705-2.158) | 3.17(3.06,3.29) | 31.605(19.043-43.979) | 33.819(20.041-47.709) | 0.070(-0.211-0.450) | 0.60(0.47,0.74) |
| Burundi | 1151.299(533.813-1688.770) | 1283.831(653.053-1868.475) | 0.115(-0.165-0.634) | -0.26(-0.71,0.19) | 55.794(26.951-81.733) | 31.811(17.259-45.474) | -0.430(-0.579--0.178) | -2.44(-2.69,-2.18) |
| Cabo Verde | 41.268(27.640-57.522) | 43.967(28.847-60.668) | 0.065(-0.237-0.406) | -0.30(-0.78,0.19) | 17.805(11.963-24.853) | 10.339(6.787-14.276) | -0.419(-0.581--0.229) | -2.34(-2.86,-1.81) |
| Cambodia | 1919.810(1062.724-2807.787) | 3856.714(2197.999-5579.894) | 1.009(0.506-1.733) | 2.23(2.18,2.29) | 47.715(26.996-69.861) | 36.053(21.254-51.917) | -0.244(-0.426-0.018) | -1.03(-1.10,-0.95) |
| Cameroon | 978.659(618.263-1320.769) | 1585.686(896.035-2428.504) | 0.620(0.084-1.355) | 1.27(1.03,1.51) | 26.290(16.533-35.602) | 15.117(8.655-23.206) | -0.425(-0.597--0.161) | -2.09(-2.32,-1.87) |
| Canada | 1720.317(867.189-2647.806) | 1957.379(1150.600-2837.495) | 0.138(-0.023-0.493) | 0.51(0.26,0.76) | 5.415(2.733-8.323) | 2.538(1.527-3.648) | -0.531(-0.595--0.381) | -2.40(-2.65,-2.16) |
| Central African Republic | 719.741(372.530-1045.246) | 1191.481(614.821-1811.774) | 0.655(0.273-1.070) | 1.60(1.52,1.68) | 75.641(41.505-109.045) | 66.011(37.343-98.737) | -0.127(-0.324-0.099) | -0.50(-0.55,-0.44) |
| Chad | 1040.248(579.893-1506.226) | 2229.207(1180.712-3368.032) | 1.143(0.629-1.841) | 2.41(2.23,2.59) | 39.586(22.723-57.713) | 42.356(23.770-63.157) | 0.070(-0.187-0.396) | 0.14(-0.12,0.39) |
| Chile | 723.024(491.974-983.499) | 979.355(673.951-1332.131) | 0.355(0.117-0.687) | 1.47(1.29,1.65) | 8.158(5.507-11.175) | 3.735(2.589-5.101) | -0.542(-0.619--0.432) | -2.00(-2.17,-1.82) |
| China | 124165.187(88271.225-161716.892) | 32251.231(13212.276-58923.634) | -0.740(-0.884--0.549) | -5.04(-5.59,-4.49) | 21.566(15.074-27.647) | 2.032(0.816-3.742) | -0.906(-0.957--0.833) | -7.92(-8.20,-7.63) |
| Colombia | 2888.709(2119.165-3701.465) | 3345.920(2228.309-4619.720) | 0.158(-0.078-0.390) | 0.01(-0.18,0.21) | 18.967(13.988-24.266) | 5.871(3.907-8.146) | -0.690(-0.755--0.627) | -4.25(-4.47,-4.03) |
| Comoros | 93.444(49.991-134.918) | 153.900(79.864-227.138) | 0.647(0.189-1.299) | 1.36(1.10,1.62) | 56.772(33.097-81.560) | 36.544(20.059-53.997) | -0.356(-0.524--0.134) | -1.69(-1.91,-1.47) |
| Congo | 666.969(377.532-958.450) | 1160.223(665.584-1755.675) | 0.740(0.332-1.321) | 1.51(1.32,1.70) | 75.302(45.219-106.212) | 53.097(32.154-76.090) | -0.295(-0.450--0.073) | -1.38(-1.51,-1.25) |
| Cook Islands | 8.549(6.611-10.846) | 8.385(6.238-10.694) | -0.019(-0.263-0.300) | -0.01(-0.19,0.17) | 80.370(62.065-100.360) | 33.881(25.210-43.355) | -0.578(-0.685--0.445) | -2.77(-2.91,-2.62) |
| Costa Rica | 240.778(142.366-335.805) | 358.115(241.720-476.252) | 0.487(0.216-0.921) | 0.81(0.62,1.00) | 14.443(8.541-20.087) | 6.274(4.233-8.384) | -0.566(-0.639--0.450) | -3.17(-3.35,-2.99) |
| Côte d'Ivoire | 769.204(466.798-1061.822) | 2094.838(1228.058-3063.030) | 1.723(0.972-3.004) | 3.22(2.94,3.50) | 23.095(14.788-32.210) | 21.545(13.075-31.229) | -0.067(-0.316-0.346) | -0.20(-0.42,0.02) |
| Croatia | 843.807(542.526-1177.283) | 708.277(434.816-1021.585) | -0.161(-0.302-0.000) | -0.14(-0.39,0.12) | 16.461(10.527-22.989) | 7.341(4.532-10.467) | -0.554(-0.627--0.479) | -2.28(-2.50,-2.07) |
| Cuba | 1093.351(655.156-1563.659) | 1819.023(1239.101-2434.303) | 0.664(0.285-1.296) | 1.51(1.15,1.86) | 11.280(6.725-16.134) | 8.680(5.904-11.675) | -0.230(-0.405-0.066) | -1.03(-1.40,-0.66) |
| Cyprus | 94.166(54.713-134.412) | 123.083(81.407-174.094) | 0.307(-0.038-0.938) | 0.81(0.59,1.04) | 19.588(11.413-29.146) | 8.265(5.476-11.905) | -0.578(-0.702--0.344) | -2.88(-3.22,-2.54) |
| Czechia | 1759.662(890.156-2643.867) | 1744.820(1114.897-2396.653) | -0.008(-0.194-0.392) | 0.08(-0.16,0.32) | 13.086(6.619-19.758) | 7.567(4.803-10.412) | -0.422(-0.530--0.186) | -1.78(-1.97,-1.59) |
| Democratic People's Republic of Korea | 1334.355(806.489-2041.183) | 4132.439(2647.238-6043.992) | 2.097(1.132-3.958) | 4.02(3.77,4.27) | 12.295(7.419-18.583) | 14.480(9.302-21.065) | 0.178(-0.203-0.954) | 0.74(0.49,0.99) |
| Democratic Republic of the Congo | 6540.699(3659.957-9765.751) | 15309.808(8247.297-22122.281) | 1.341(0.716-2.073) | 2.69(2.59,2.78) | 51.272(30.467-74.188) | 53.416(29.993-75.543) | 0.042(-0.220-0.392) | 0.14(0.07,0.21) |
| Denmark | 720.459(355.265-1098.334) | 243.516(141.803-360.421) | -0.662(-0.716--0.562) | -3.90(-4.17,-3.64) | 8.587(4.283-13.050) | 1.818(1.054-2.683) | -0.788(-0.821--0.728) | -5.31(-5.53,-5.10) |
| Djibouti | 40.468(24.884-56.746) | 105.468(65.033-160.285) | 1.606(0.799-2.815) | 2.63(2.43,2.82) | 41.514(27.614-58.371) | 23.592(14.841-35.873) | -0.432(-0.593--0.184) | -2.26(-2.42,-2.09) |
| Dominica | 17.642(13.343-22.395) | 18.462(13.450-24.106) | 0.047(-0.188-0.360) | 0.21(-0.06,0.48) | 31.322(23.644-40.186) | 24.265(17.617-31.808) | -0.225(-0.401-0.002) | -0.76(-0.98,-0.54) |
| Dominican Republic | 640.833(438.849-870.879) | 1397.193(906.185-1946.636) | 1.180(0.649-1.820) | 2.89(2.69,3.09) | 20.178(13.790-27.311) | 14.278(9.286-19.921) | -0.292(-0.464--0.086) | -0.59(-0.81,-0.37) |
| Ecuador | 1363.295(945.268-1742.329) | 2245.656(1490.907-3093.066) | 0.647(0.289-1.095) | 2.56(2.02,3.11) | 29.311(21.086-37.068) | 15.550(10.564-21.388) | -0.469(-0.583--0.328) | -1.19(-1.70,-0.67) |
| Egypt | 3408.007(1681.992-5920.488) | 574.067(79.179-1582.094) | -0.832(-0.965--0.672) | -6.65(-8.03,-5.25) | 22.586(11.654-38.834) | 2.419(0.373-6.331) | -0.893(-0.977--0.767) | -7.34(-8.43,-6.23) |
| El Salvador | 393.212(202.294-566.857) | 417.139(244.166-601.205) | 0.061(-0.155-0.407) | 0.19(-0.24,0.62) | 13.384(7.057-19.286) | 6.191(3.581-8.959) | -0.537(-0.632--0.393) | -2.58(-3.03,-2.12) |
| Equatorial Guinea | 119.968(63.437-174.898) | 124.373(69.738-198.235) | 0.037(-0.287-0.630) | -0.39(-1.01,0.24) | 72.576(41.204-103.918) | 30.900(18.350-49.199) | -0.574(-0.697--0.346) | -3.35(-3.82,-2.89) |
| Eritrea | 690.581(394.682-980.264) | 1068.010(606.954-1568.321) | 0.547(0.162-1.154) | 1.70(1.51,1.89) | 79.268(49.357-108.249) | 51.232(31.122-71.840) | -0.354(-0.513--0.091) | -1.48(-1.57,-1.40) |
| Estonia | 362.128(209.201-523.230) | 739.775(500.910-1034.847) | 1.043(0.349-2.346) | 3.13(2.66,3.60) | 18.591(10.775-26.856) | 21.713(14.996-29.959) | 0.168(-0.222-0.887) | 1.21(0.78,1.65) |
| Eswatini | 115.715(72.116-161.850) | 215.902(126.099-325.108) | 0.866(0.324-1.664) | 2.32(1.67,2.99) | 49.538(32.435-69.927) | 45.705(27.549-67.301) | -0.077(-0.346-0.298) | 0.27(-0.27,0.80) |
| Ethiopia | 11126.559(6940.906-14946.383) | 10379.849(6875.704-14027.991) | -0.067(-0.281-0.294) | -0.88(-1.15,-0.61) | 67.616(44.360-89.633) | 28.766(19.511-38.282) | -0.575(-0.669--0.408) | -3.30(-3.50,-3.10) |
| Fiji | 148.338(80.361-208.581) | 164.263(97.248-239.730) | 0.107(-0.181-0.502) | 0.40(0.21,0.58) | 44.259(25.894-62.157) | 25.350(15.340-36.231) | -0.427(-0.560--0.265) | -1.95(-2.11,-1.79) |
| Finland | 777.323(421.809-1139.157) | 1020.139(671.101-1386.722) | 0.312(0.027-0.919) | 1.19(0.74,1.65) | 10.958(5.948-16.063) | 6.357(4.356-8.499) | -0.420(-0.534--0.171) | -1.47(-1.82,-1.12) |
| France | 4400.460(2901.690-6224.548) | 5082.491(3578.256-7011.018) | 0.155(-0.072-0.485) | 0.58(0.47,0.68) | 5.072(3.348-7.157) | 2.525(1.781-3.428) | -0.502(-0.582--0.382) | -2.13(-2.22,-2.04) |
| Gabon | 257.300(167.510-356.512) | 312.202(199.546-446.188) | 0.213(-0.118-0.703) | 0.49(0.38,0.60) | 52.148(34.152-72.675) | 38.275(25.104-55.582) | -0.266(-0.461-0.032) | -1.11(-1.24,-0.97) |
| Gambia | 109.420(56.331-161.656) | 316.822(175.043-468.474) | 1.895(1.109-3.051) | 3.41(3.19,3.64) | 34.407(18.695-50.678) | 35.362(20.233-52.372) | 0.028(-0.235-0.408) | -0.01(-0.15,0.13) |
| Georgia | 656.393(362.272-1002.023) | 1017.563(704.876-1384.146) | 0.550(0.152-1.392) | 2.12(1.22,3.03) | 11.645(6.405-17.584) | 15.646(10.851-21.093) | 0.344(0.014-1.070) | 1.61(0.81,2.41) |
| Germany | 14221.928(8890.760-19995.345) | 13546.074(9084.454-18249.474) | -0.048(-0.246-0.278) | 0.30(0.14,0.46) | 10.905(6.801-15.342) | 5.510(3.708-7.392) | -0.495(-0.589--0.340) | -1.78(-1.95,-1.60) |
| Ghana | 1629.007(970.741-2243.165) | 2887.926(1858.805-4094.540) | 0.773(0.253-1.569) | 1.76(1.52,2.01) | 29.222(18.056-39.853) | 19.356(12.623-27.360) | -0.338(-0.528--0.057) | -1.46(-1.69,-1.23) |
| Greece | 46.428(4.870-128.228) | 632.571(268.817-1166.371) | 12.625(4.858-93.444) | 10.47(9.82,11.12) | 0.410(0.056-1.095) | 1.767(0.775-3.232) | 3.309(1.005-21.040) | 6.53(5.88,7.19) |
| Greenland | 2.881(1.724-4.136) | 2.202(1.328-3.360) | -0.236(-0.428--0.026) | -0.79(-0.90,-0.67) | 9.855(5.754-14.788) | 3.789(2.316-5.742) | -0.616(-0.707--0.513) | -3.08(-3.18,-2.98) |
| Grenada | 25.688(15.741-35.310) | 23.994(16.810-31.215) | -0.066(-0.239-0.195) | -0.20(-0.50,0.10) | 34.606(20.446-47.438) | 24.205(16.973-31.571) | -0.301(-0.438--0.079) | -1.10(-1.31,-0.89) |
| Guam | 20.711(13.775-26.254) | 23.420(15.409-31.774) | 0.131(-0.155-0.670) | 0.51(0.11,0.92) | 36.462(24.544-46.294) | 11.151(7.417-15.196) | -0.694(-0.777--0.537) | -3.49(-4.08,-2.89) |
| Guatemala | 350.265(205.561-484.123) | 605.768(361.417-853.900) | 0.729(0.468-1.041) | 1.90(1.26,2.54) | 13.176(8.366-17.821) | 6.610(4.032-9.351) | -0.498(-0.569--0.425) | -2.15(-2.58,-1.72) |
| Guinea | 674.513(436.956-959.629) | 1292.464(800.138-1880.390) | 0.916(0.278-1.856) | 2.09(1.68,2.50) | 22.583(15.135-32.097) | 25.406(16.068-36.418) | 0.125(-0.249-0.671) | 0.50(0.23,0.77) |
| Guinea-Bissau | 241.784(117.120-353.085) | 372.986(182.158-558.388) | 0.543(0.170-1.088) | 1.47(1.41,1.52) | 64.353(34.235-93.148) | 55.743(29.107-82.520) | -0.134(-0.331-0.150) | -0.43(-0.56,-0.29) |
| Guyana | 268.108(171.371-355.513) | 199.610(143.461-270.851) | -0.255(-0.455-0.079) | -0.24(-0.84,0.36) | 76.201(50.371-99.884) | 35.798(25.873-47.345) | -0.530(-0.646--0.347) | -1.92(-2.34,-1.49) |
| Haiti | 1662.583(800.789-2470.157) | 3106.247(1551.222-4796.333) | 0.868(0.374-1.507) | 2.11(2.04,2.17) | 58.952(30.650-86.267) | 48.167(25.232-73.890) | -0.183(-0.380-0.074) | -0.61(-0.67,-0.55) |
| Honduras | 412.407(250.949-582.868) | 1100.942(747.131-1475.235) | 1.670(1.158-2.522) | 3.37(3.15,3.59) | 22.947(14.638-32.997) | 21.419(14.675-28.720) | -0.067(-0.241-0.176) | -0.11(-0.28,0.06) |
| Hungary | 2056.975(1311.075-2903.191) | 1608.210(1019.313-2344.321) | -0.218(-0.400--0.004) | -0.53(-0.90,-0.16) | 15.001(9.566-21.001) | 7.555(4.795-11.012) | -0.496(-0.610--0.360) | -2.06(-2.33,-1.78) |
| Iceland | 26.668(13.837-39.045) | 23.416(14.447-33.322) | -0.122(-0.261-0.119) | -0.21(-0.38,-0.03) | 8.944(4.665-13.140) | 3.390(2.079-4.840) | -0.621(-0.678--0.516) | -2.93(-3.05,-2.81) |
| India | 64983.194(41135.836-91455.944) | 140780.475(93832.959-187935.615) | 1.166(0.794-1.724) | 2.73(2.57,2.88) | 15.963(10.387-22.517) | 13.182(8.926-17.699) | -0.174(-0.324-0.050) | -0.45(-0.65,-0.25) |
| Indonesia | 26739.333(12546.848-39072.434) | 40113.100(23136.964-55970.004) | 0.500(0.153-1.081) | 1.29(1.20,1.39) | 28.588(14.694-42.017) | 19.583(11.423-27.473) | -0.315(-0.465--0.060) | -1.15(-1.23,-1.07) |
| Iran (Islamic Republic of) | 4471.907(3179.521-6022.427) | 4723.760(2898.011-7141.435) | 0.056(-0.236-0.379) | 0.25(-0.14,0.63) | 24.149(17.467-32.627) | 7.492(4.636-11.174) | -0.690(-0.774--0.598) | -3.92(-4.25,-3.58) |
| Iraq | 933.214(545.556-1438.261) | 1712.474(942.169-2709.211) | 0.835(0.261-1.606) | 0.59(0.17,1.00) | 12.576(7.381-19.197) | 10.020(5.747-15.292) | -0.203(-0.431-0.147) | -2.30(-2.76,-1.83) |
| Ireland | 382.121(198.643-572.252) | 177.197(101.656-264.145) | -0.536(-0.610--0.435) | -2.41(-2.61,-2.22) | 9.687(5.025-14.513) | 2.105(1.202-3.130) | -0.783(-0.816--0.740) | -4.80(-4.96,-4.64) |
| Israel | 98.994(43.265-182.153) | 44.341(11.759-94.926) | -0.552(-0.809--0.237) | -2.32(-3.57,-1.05) | 2.292(1.029-4.208) | 0.294(0.083-0.625) | -0.872(-0.944--0.787) | -6.26(-7.39,-5.11) |
| Italy | 3351.739(1986.443-4983.851) | 12460.984(8029.046-17414.385) | 2.718(1.667-4.238) | 5.21(4.93,5.49) | 4.054(2.403-5.960) | 5.853(3.889-8.098) | 0.444(0.073-0.980) | 2.06(1.78,2.34) |
| Jamaica | 475.984(382.094-572.846) | 559.158(407.919-732.870) | 0.175(-0.099-0.502) | 1.48(0.74,2.23) | 25.885(20.802-31.162) | 16.444(11.877-21.839) | -0.365(-0.517--0.186) | -0.57(-1.36,0.22) |
| Japan | 4888.316(3132.435-7067.938) | 5317.851(2785.263-8395.580) | 0.088(-0.235-0.457) | 1.12(0.35,1.90) | 3.261(2.073-4.757) | 0.919(0.518-1.408) | -0.718(-0.783--0.654) | -3.29(-4.02,-2.55) |
| Jordan | 269.048(192.043-366.144) | 742.891(485.955-1013.388) | 1.761(0.981-2.776) | 2.88(2.65,3.11) | 26.406(19.046-35.308) | 14.086(9.101-19.631) | -0.467(-0.624--0.263) | -2.38(-2.58,-2.19) |
| Kazakhstan | 1378.209(770.357-2050.226) | 388.024(155.376-750.289) | -0.718(-0.840--0.593) | -6.63(-7.96,-5.29) | 11.806(6.510-17.583) | 3.202(1.349-5.957) | -0.729(-0.833--0.619) | -6.48(-7.77,-5.17) |
| Kenya | 1337.748(955.161-1784.446) | 3095.204(2109.452-4200.772) | 1.314(0.779-1.941) | 3.16(3.00,3.32) | 20.108(14.560-27.034) | 18.953(12.661-26.132) | -0.057(-0.281-0.221) | 0.20(0.03,0.38) |
| Kiribati | 10.874(4.999-16.066) | 18.915(8.842-29.373) | 0.739(0.348-1.309) | 1.87(1.79,1.95) | 30.783(14.772-44.632) | 27.417(13.756-41.588) | -0.109(-0.302-0.148) | -0.39(-0.43,-0.35) |
| Kuwait | 52.432(31.274-78.353) | 66.935(28.645-120.028) | 0.277(-0.227-0.750) | 0.99(-0.51,2.52) | 11.030(6.728-16.454) | 2.794(1.252-4.995) | -0.747(-0.854--0.630) | -4.34(-5.58,-3.09) |
| Kyrgyzstan | 260.419(152.538-392.249) | 291.206(149.847-471.892) | 0.118(-0.234-0.495) | -0.73(-1.21,-0.25) | 9.680(5.670-14.610) | 7.651(4.021-12.138) | -0.210(-0.452-0.047) | -1.63(-2.09,-1.16) |
| Lao People's Democratic Republic | 1490.614(714.780-2212.585) | 925.447(606.630-1291.459) | -0.379(-0.558--0.040) | -2.08(-2.58,-1.58) | 76.863(38.220-113.155) | 24.159(15.914-33.627) | -0.686(-0.770--0.526) | -4.13(-4.53,-3.74) |
| Latvia | 392.765(189.896-614.107) | 410.417(264.175-593.671) | 0.045(-0.185-0.596) | -0.06(-0.38,0.27) | 11.362(5.496-17.803) | 9.057(5.818-12.981) | -0.203(-0.370-0.205) | -1.01(-1.40,-0.63) |
| Lebanon | 25.767(4.358-60.122) | 82.807(21.361-173.772) | 2.214(0.034-12.149) | 5.97(4.98,6.98) | 2.017(0.369-4.514) | 1.177(0.308-2.466) | -0.416(-0.806-1.246) | -0.55(-1.11,0.01) |
| Lesotho | 301.150(191.597-417.198) | 522.695(302.415-748.214) | 0.736(0.168-1.481) | 2.48(1.88,3.08) | 41.432(26.411-57.026) | 57.493(34.874-79.197) | 0.388(-0.051-1.044) | 2.03(1.51,2.56) |
| Liberia | 337.799(192.991-470.975) | 662.162(340.489-1006.566) | 0.960(0.401-1.725) | 1.88(1.69,2.08) | 32.300(18.936-44.284) | 34.163(18.848-51.457) | 0.058(-0.217-0.429) | -0.10(-0.33,0.12) |
| Libya | 175.226(100.677-272.922) | 660.839(393.402-1036.113) | 2.771(1.723-4.505) | 4.86(4.54,5.18) | 10.294(5.976-16.086) | 14.761(8.959-23.040) | 0.434(0.031-1.078) | 1.70(1.41,1.99) |
| Lithuania | 587.115(289.036-916.142) | 497.548(280.409-748.717) | -0.153(-0.306-0.088) | -0.72(-0.92,-0.52) | 13.379(6.562-20.877) | 7.551(4.274-11.351) | -0.436(-0.534--0.269) | -2.02(-2.25,-1.79) |
| Luxembourg | 41.772(24.072-60.674) | 37.514(24.957-52.929) | -0.102(-0.290-0.268) | -0.24(-0.49,0.02) | 8.012(4.700-11.689) | 2.977(1.972-4.209) | -0.628(-0.702--0.492) | -3.06(-3.21,-2.92) |
| Madagascar | 3268.873(1970.819-4423.492) | 5909.517(3166.815-8629.774) | 0.808(0.327-1.399) | 1.87(1.71,2.03) | 73.940(46.092-99.114) | 62.767(37.617-88.477) | -0.151(-0.362-0.127) | -0.67(-0.73,-0.60) |
| Malawi | 1081.817(591.803-1542.690) | 1992.949(1086.176-2895.372) | 0.842(0.460-1.352) | 1.51(1.30,1.72) | 34.874(20.620-48.550) | 32.209(18.913-46.656) | -0.076(-0.278-0.193) | -0.59(-0.79,-0.39) |
| Malaysia | 1806.413(776.131-2723.218) | 2287.337(1282.549-3303.349) | 0.266(0.089-0.724) | 0.67(0.37,0.97) | 20.069(8.998-30.334) | 8.752(4.849-12.730) | -0.564(-0.629--0.420) | -2.79(-2.99,-2.60) |
| Maldives | 15.478(8.738-22.019) | 18.851(12.064-25.996) | 0.218(-0.105-0.819) | 0.14(-0.24,0.52) | 20.439(11.587-29.471) | 6.297(4.132-8.694) | -0.692(-0.777--0.523) | -4.22(-4.46,-3.99) |
| Mali | 1078.434(586.189-1530.529) | 1768.019(942.940-2531.359) | 0.639(0.243-1.319) | 1.89(1.69,2.09) | 30.204(16.620-42.748) | 21.945(11.655-31.046) | -0.273(-0.448--0.012) | -0.97(-1.04,-0.89) |
| Malta | 30.773(17.158-45.613) | 25.632(13.648-39.694) | -0.167(-0.398-0.129) | -0.25(-0.50,0.01) | 7.776(4.313-11.507) | 2.216(1.176-3.455) | -0.715(-0.795--0.622) | -3.62(-3.82,-3.41) |
| Marshall Islands | 9.635(4.785-13.759) | 16.596(8.187-25.155) | 0.722(0.294-1.211) | 1.82(1.76,1.89) | 65.000(34.372-91.260) | 51.432(27.688-75.805) | -0.209(-0.388--0.007) | -0.74(-0.84,-0.65) |
| Mauritania | 484.430(247.163-711.191) | 580.020(337.484-864.935) | 0.197(-0.120-0.762) | 0.25(0.06,0.45) | 52.301(27.895-76.880) | 30.021(17.781-44.924) | -0.426(-0.573--0.172) | -2.16(-2.32,-1.99) |
| Mauritius | 212.183(154.214-270.056) | 229.340(173.572-294.576) | 0.081(-0.070-0.284) | 0.48(-0.03,1.00) | 32.639(23.927-41.443) | 13.667(10.383-17.667) | -0.581(-0.638--0.506) | -2.58(-3.08,-2.08) |
| Mexico | 4020.175(2786.016-5242.676) | 8596.662(5560.200-11997.284) | 1.138(0.788-1.510) | 2.59(2.21,2.98) | 11.952(8.648-15.644) | 7.519(4.890-10.411) | -0.371(-0.481--0.256) | -1.51(-1.86,-1.15) |
| Micronesia (Federated States of) | 31.155(15.902-44.839) | 35.348(18.170-53.223) | 0.135(-0.172-0.561) | 0.41(0.27,0.54) | 68.800(35.083-97.945) | 52.612(29.633-78.492) | -0.235(-0.430-0.030) | -0.86(-0.92,-0.79) |
| Monaco | 1.519(0.582-2.933) | 1.086(0.359-2.395) | -0.285(-0.710-0.380) | -0.74(-1.19,-0.28) | 1.875(0.745-3.561) | 0.838(0.279-1.742) | -0.553(-0.804--0.186) | -2.20(-2.57,-1.84) |
| Mongolia | 474.327(165.437-758.606) | 257.409(127.945-381.707) | -0.457(-0.559--0.196) | -3.14(-3.49,-2.78) | 49.349(17.776-78.236) | 14.318(7.105-21.382) | -0.710(-0.763--0.588) | -5.02(-5.41,-4.63) |
| Montenegro | 12.862(5.282-23.368) | 15.145(5.252-30.378) | 0.177(-0.329-0.975) | -1.59(-2.59,-0.58) | 2.280(0.954-4.113) | 2.127(0.809-4.163) | -0.067(-0.444-0.584) | -2.30(-3.29,-1.31) |
| Morocco | 3471.775(2262.588-4845.098) | 4049.363(2284.538-6362.131) | 0.166(-0.185-0.538) | 0.49(0.08,0.90) | 27.107(17.648-37.845) | 14.247(8.103-22.390) | -0.474(-0.620--0.316) | -2.05(-2.39,-1.71) |
| Mozambique | 2627.924(1437.393-3686.749) | 4429.909(2149.534-6564.343) | 0.686(0.222-1.195) | 2.04(1.92,2.16) | 55.720(34.113-76.730) | 50.317(26.467-73.099) | -0.097(-0.358-0.193) | 0.02(-0.11,0.15) |
| Myanmar | 9981.597(5230.006-14960.023) | 7309.174(4475.355-10512.568) | -0.268(-0.494-0.113) | -1.68(-2.00,-1.35) | 46.661(24.830-68.791) | 17.211(10.438-24.721) | -0.631(-0.741--0.435) | -3.79(-4.07,-3.52) |
| Namibia | 290.632(172.731-408.435) | 401.989(257.107-565.763) | 0.383(-0.060-1.024) | 0.46(0.12,0.80) | 54.618(34.663-75.453) | 37.942(24.636-53.107) | -0.305(-0.531--0.004) | -1.56(-1.83,-1.29) |
| Nauru | 2.292(1.183-3.322) | 2.758(1.405-4.246) | 0.204(-0.073-0.576) | 0.35(-0.34,1.04) | 51.532(28.683-74.156) | 48.522(25.703-73.150) | -0.058(-0.259-0.206) | -0.25(-0.85,0.35) |
| Nepal | 2224.721(1181.141-3240.702) | 3603.308(2471.322-5002.064) | 0.620(0.166-1.579) | 1.80(1.23,2.37) | 28.071(15.938-40.372) | 19.492(13.383-27.234) | -0.306(-0.494-0.049) | -1.09(-1.62,-0.55) |
| Netherlands | 1306.524(698.725-1924.883) | 974.027(610.728-1347.930) | -0.254(-0.373--0.008) | -1.03(-1.20,-0.86) | 6.517(3.495-9.580) | 2.460(1.570-3.403) | -0.623(-0.677--0.506) | -3.23(-3.34,-3.12) |
| New Zealand | 277.916(144.039-417.100) | 246.007(140.772-368.799) | -0.115(-0.221-0.044) | -0.51(-0.57,-0.46) | 7.263(3.756-10.900) | 2.707(1.548-4.044) | -0.627(-0.666--0.568) | -3.26(-3.32,-3.21) |
| Nicaragua | 288.047(159.682-404.061) | 610.069(340.363-862.419) | 1.118(0.765-1.533) | 2.38(2.10,2.65) | 20.562(11.597-28.971) | 13.991(7.940-19.536) | -0.320(-0.431--0.192) | -1.21(-1.40,-1.02) |
| Niger | 410.623(228.415-597.179) | 895.734(475.501-1374.176) | 1.181(0.524-2.358) | 2.57(2.25,2.89) | 18.271(10.081-27.098) | 13.338(7.215-20.235) | -0.270(-0.480-0.084) | -1.09(-1.33,-0.84) |
| Nigeria | 9102.447(6390.723-12576.622) | 9164.967(5612.707-12388.217) | 0.007(-0.327-0.353) | -0.76(-1.16,-0.35) | 24.463(17.390-33.163) | 12.181(7.818-16.327) | -0.502(-0.659--0.350) | -2.99(-3.35,-2.62) |
| Niue | 0.842(0.461-1.210) | 0.531(0.295-0.785) | -0.369(-0.510--0.216) | -1.80(-1.96,-1.63) | 36.856(19.755-53.221) | 25.745(14.296-38.084) | -0.301(-0.451--0.126) | -1.42(-1.51,-1.33) |
| North Macedonia | 96.794(47.611-164.278) | 99.108(34.702-196.125) | 0.024(-0.441-0.706) | -0.61(-1.19,-0.03) | 6.488(3.203-10.980) | 5.076(2.023-9.684) | -0.218(-0.579-0.304) | -1.72(-2.60,-0.82) |
| Northern Mariana Islands | 2.286(1.168-3.424) | 5.456(3.026-7.766) | 1.387(0.859-2.104) | 3.33(3.12,3.55) | 13.625(7.406-19.875) | 12.008(6.768-17.298) | -0.119(-0.292-0.092) | -0.20(-0.43,0.02) |
| Norway | 613.387(309.173-912.451) | 285.381(176.716-413.633) | -0.535(-0.599--0.405) | -2.65(-2.78,-2.51) | 8.563(4.306-12.633) | 2.379(1.447-3.422) | -0.722(-0.759--0.652) | -4.26(-4.37,-4.15) |
| Oman | 167.777(108.267-245.471) | 222.654(147.015-310.816) | 0.327(-0.152-0.992) | 0.88(0.35,1.42) | 31.542(20.815-45.803) | 16.174(10.535-22.851) | -0.487(-0.688--0.210) | -1.99(-2.49,-1.49) |
| Pakistan | 13595.301(7470.628-19800.903) | 25092.998(14623.846-37786.921) | 0.846(0.502-1.401) | 1.84(1.76,1.93) | 26.679(15.456-38.712) | 23.977(14.617-35.274) | -0.101(-0.265-0.146) | -0.46(-0.58,-0.33) |
| Palau | 2.608(1.163-3.969) | 4.047(1.969-6.226) | 0.552(0.174-1.048) | 1.29(1.15,1.44) | 28.375(13.436-42.899) | 20.413(10.141-31.357) | -0.281(-0.440--0.072) | -0.86(-0.96,-0.76) |
| Palestine | 438.650(279.713-609.628) | 364.970(252.464-487.082) | -0.168(-0.375-0.220) | -0.86(-1.37,-0.34) | 60.822(39.431-83.504) | 22.539(15.711-30.332) | -0.629(-0.720--0.464) | -3.29(-3.47,-3.10) |
| Panama | 152.110(77.090-222.548) | 308.020(186.170-428.993) | 1.025(0.605-1.836) | 2.04(1.81,2.27) | 10.779(5.553-15.784) | 6.726(4.064-9.424) | -0.376(-0.506--0.141) | -1.80(-2.03,-1.57) |
| Papua New Guinea | 400.681(211.086-589.053) | 1064.099(556.057-1560.759) | 1.656(0.785-2.762) | 3.34(3.25,3.42) | 25.720(14.166-38.051) | 23.291(12.616-34.294) | -0.094(-0.362-0.272) | -0.22(-0.29,-0.14) |
| Paraguay | 337.664(216.767-456.711) | 713.949(484.125-972.342) | 1.114(0.593-1.848) | 2.79(2.65,2.93) | 16.236(10.497-21.974) | 13.051(8.939-17.859) | -0.196(-0.391-0.077) | -0.36(-0.51,-0.21) |
| Peru | 1258.506(850.234-1674.350) | 1520.605(965.928-2165.742) | 0.208(-0.100-0.644) | 0.11(-0.32,0.54) | 11.342(7.826-15.062) | 4.487(2.859-6.425) | -0.604(-0.708--0.458) | -3.74(-4.17,-3.31) |
| Philippines | 7267.185(5040.975-9599.285) | 17553.295(12855.038-22638.164) | 1.415(0.993-1.977) | 3.00(2.91,3.09) | 30.125(21.699-39.437) | 24.233(17.897-31.219) | -0.196(-0.330--0.025) | -0.45(-0.55,-0.35) |
| Poland | 3931.422(2252.158-5906.754) | 3145.377(1796.577-4908.781) | -0.200(-0.426-0.079) | -0.96(-1.34,-0.59) | 9.578(5.504-14.342) | 3.989(2.281-6.160) | -0.584(-0.699--0.443) | -3.18(-3.41,-2.94) |
| Portugal | 577.068(321.880-896.679) | 737.762(424.062-1153.412) | 0.278(-0.125-0.913) | 1.41(1.17,1.65) | 4.929(2.775-7.664) | 2.199(1.277-3.440) | -0.554(-0.681--0.353) | -2.20(-2.36,-2.04) |
| Puerto Rico | 733.199(433.668-1008.827) | 756.476(522.133-999.176) | 0.032(-0.179-0.341) | -0.23(-0.49,0.03) | 21.657(12.823-29.777) | 8.799(6.124-11.659) | -0.594(-0.671--0.475) | -3.17(-3.45,-2.88) |
| Qatar | 4.172(1.660-8.101) | 3.163(0.588-7.604) | -0.242(-0.799-0.608) | -2.21(-2.78,-1.64) | 7.159(3.061-13.166) | 0.782(0.130-1.812) | -0.891(-0.971--0.768) | -8.97(-9.64,-8.29) |
| Republic of Korea | 680.797(368.250-1083.182) | 2601.575(1612.907-3897.926) | 2.821(1.529-5.283) | 5.53(5.05,6.01) | 5.163(3.037-7.610) | 3.062(1.886-4.573) | -0.407(-0.593--0.061) | -0.71(-1.26,-0.15) |
| Republic of Moldova | 369.053(179.931-585.163) | 917.081(628.982-1250.117) | 1.485(0.963-2.678) | 2.43(1.96,2.91) | 10.846(5.147-17.392) | 15.240(10.412-20.748) | 0.405(0.113-1.117) | 0.56(0.15,0.97) |
| Romania | 2091.400(1192.589-3221.041) | 490.863(83.258-1177.326) | -0.765(-0.936--0.538) | -6.07(-7.01,-5.12) | 9.384(5.316-14.598) | 1.143(0.199-2.687) | -0.878(-0.967--0.763) | -7.92(-8.54,-7.30) |
| Russian Federation | 16435.031(8493.451-25252.558) | 20027.289(11183.287-30238.903) | 0.219(0.084-0.398) | 0.89(0.50,1.28) | 10.266(5.243-15.830) | 8.402(4.712-12.605) | -0.181(-0.277--0.039) | -0.47(-0.90,-0.05) |
| Rwanda | 2010.604(1011.084-2817.246) | 1376.390(729.200-1990.000) | -0.315(-0.522-0.070) | -2.39(-3.07,-1.71) | 84.062(47.755-114.688) | 30.028(16.132-44.222) | -0.643(-0.751--0.452) | -4.57(-5.06,-4.07) |
| Saint Kitts and Nevis | 10.893(6.873-14.764) | 10.310(7.771-13.410) | -0.053(-0.241-0.262) | 0.49(-0.11,1.08) | 30.495(19.205-41.235) | 19.195(14.532-24.638) | -0.371(-0.491--0.156) | -0.80(-1.28,-0.32) |
| Saint Lucia | 29.297(19.056-39.690) | 43.325(31.603-56.677) | 0.479(0.172-0.975) | 1.52(0.87,2.17) | 39.301(26.089-52.964) | 18.953(13.720-24.819) | -0.518(-0.616--0.367) | -2.51(-3.02,-2.00) |
| Saint Vincent and the Grenadines | 29.697(20.077-38.853) | 43.615(33.831-53.699) | 0.469(0.166-0.895) | 1.24(0.60,1.88) | 45.390(30.984-59.611) | 35.052(27.251-42.987) | -0.228(-0.381--0.007) | -0.95(-1.54,-0.35) |
| Samoa | 48.229(23.099-70.587) | 66.333(33.299-97.762) | 0.375(0.106-0.768) | 0.99(0.90,1.09) | 62.156(31.701-88.888) | 49.367(25.306-72.021) | -0.206(-0.353-0.001) | -0.82(-0.94,-0.70) |
| San Marino | 1.666(1.045-2.405) | 2.192(1.240-3.345) | 0.315(-0.137-0.919) | 1.85(1.35,2.35) | 4.471(2.801-6.516) | 1.944(1.120-3.018) | -0.565(-0.714--0.374) | -1.75(-2.30,-1.21) |
| Sao Tome and Principe | 14.026(6.930-20.534) | 18.149(9.210-27.210) | 0.294(0.048-0.629) | 0.69(0.57,0.82) | 23.268(11.985-34.359) | 18.083(9.563-27.063) | -0.223(-0.363--0.043) | -0.89(-0.97,-0.80) |
| Saudi Arabia | 1364.596(847.958-2007.195) | 3503.262(2086.809-5233.641) | 1.567(0.830-2.701) | 3.12(2.99,3.25) | 29.478(18.636-43.211) | 21.968(13.258-31.887) | -0.255(-0.457-0.053) | -0.96(-1.17,-0.76) |
| Senegal | 711.843(420.429-1008.144) | 1279.070(831.411-1833.748) | 0.797(0.334-1.562) | 2.20(1.80,2.61) | 24.274(14.677-34.600) | 18.573(12.087-26.739) | -0.235(-0.426-0.066) | -0.76(-1.11,-0.40) |
| Serbia | 1548.903(1033.019-2238.614) | 1892.977(1184.262-2735.245) | 0.222(-0.031-0.525) | 0.37(0.20,0.53) | 18.986(12.561-27.408) | 11.072(6.968-15.997) | -0.417(-0.539--0.265) | -2.54(-2.88,-2.19) |
| Seychelles | 28.266(21.394-36.506) | 29.325(22.085-37.520) | 0.037(-0.129-0.259) | 0.21(0.10,0.32) | 50.575(38.261-65.333) | 28.778(21.362-36.660) | -0.431(-0.529--0.296) | -1.74(-1.85,-1.62) |
| Sierra Leone | 426.042(233.192-627.186) | 712.966(395.237-1044.331) | 0.673(0.259-1.278) | 1.77(1.57,1.96) | 22.310(12.435-32.748) | 20.495(11.685-30.171) | -0.081(-0.296-0.221) | -0.14(-0.48,0.20) |
| Singapore | 202.176(138.764-276.603) | 262.731(174.867-356.275) | 0.300(0.016-0.615) | 1.09(0.84,1.34) | 10.702(7.498-14.714) | 3.151(2.081-4.268) | -0.706(-0.768--0.638) | -3.61(-3.82,-3.41) |
| Slovakia | 828.130(463.260-1221.882) | 755.677(439.090-1086.555) | -0.087(-0.237-0.128) | -0.13(-0.24,-0.01) | 14.399(8.046-21.276) | 8.028(4.662-11.512) | -0.442(-0.533--0.308) | -1.73(-1.87,-1.59) |
| Slovenia | 240.592(163.027-335.682) | 356.784(232.033-485.231) | 0.483(0.136-1.046) | 1.54(1.27,1.81) | 9.943(6.775-13.849) | 6.268(4.185-8.418) | -0.370(-0.507--0.159) | -1.31(-1.46,-1.16) |
| Solomon Islands | 93.994(36.361-145.666) | 224.026(91.672-351.694) | 1.383(0.777-2.460) | 2.83(2.74,2.92) | 75.323(32.494-115.155) | 67.464(29.335-104.027) | -0.104(-0.312-0.208) | -0.32(-0.41,-0.23) |
| Somalia | 1451.703(749.248-2149.503) | 2472.314(1254.505-3745.329) | 0.703(0.251-1.273) | 1.75(1.63,1.87) | 73.178(42.815-103.299) | 50.054(26.239-72.359) | -0.316(-0.483--0.096) | -1.23(-1.32,-1.14) |
| South Africa | 3580.583(2634.521-4720.722) | 8191.282(6116.464-10591.301) | 1.288(0.968-1.654) | 2.55(2.12,2.98) | 18.885(13.892-24.710) | 21.082(15.471-27.443) | 0.116(-0.065-0.324) | 0.25(-0.17,0.68) |
| South Sudan | 928.628(548.559-1354.734) | 889.257(516.632-1367.028) | -0.042(-0.307-0.374) | -0.45(-0.87,-0.03) | 43.241(26.802-63.082) | 28.295(16.370-42.470) | -0.346(-0.513--0.084) | -1.66(-1.99,-1.33) |
| Spain | 1193.257(597.416-1945.682) | 3766.201(2383.528-5397.988) | 2.156(1.222-4.077) | 4.28(4.00,4.56) | 2.372(1.196-3.858) | 2.695(1.747-3.797) | 0.136(-0.168-0.744) | 0.87(0.64,1.11) |
| Sri Lanka | 2784.239(1727.526-3775.779) | 2824.249(1654.602-4338.483) | 0.014(-0.348-0.474) | -0.23(-0.43,-0.03) | 30.232(19.172-41.918) | 11.552(6.599-17.827) | -0.618(-0.750--0.436) | -3.16(-3.31,-3.01) |
| Sudan | 3161.483(2037.359-4396.715) | 4160.744(2556.635-6166.201) | 0.316(-0.047-0.804) | 0.57(0.43,0.72) | 39.453(25.848-54.762) | 24.730(15.337-36.927) | -0.373(-0.538--0.149) | -1.70(-1.82,-1.58) |
| Suriname | 61.699(42.814-79.717) | 105.223(70.348-146.866) | 0.705(0.295-1.256) | 2.17(1.92,2.43) | 25.802(18.298-33.307) | 17.447(11.659-24.528) | -0.324(-0.487--0.105) | -1.00(-1.20,-0.80) |
| Sweden | 1297.829(627.161-1972.339) | 1117.608(757.331-1508.912) | -0.139(-0.333-0.365) | -0.03(-0.25,0.19) | 8.020(3.941-12.112) | 3.962(2.679-5.391) | -0.506(-0.613--0.238) | -1.86(-2.05,-1.66) |
| Switzerland | 961.985(624.076-1338.242) | 1305.245(878.129-1763.527) | 0.357(0.013-0.887) | 1.28(1.08,1.47) | 8.663(5.586-12.048) | 5.027(3.415-6.720) | -0.420(-0.555--0.229) | -1.45(-1.67,-1.23) |
| Syrian Arab Republic | 1030.064(650.239-1457.347) | 2459.016(1494.957-3624.168) | 1.387(0.674-2.524) | 2.50(2.29,2.72) | 23.837(15.327-33.811) | 25.251(16.251-36.291) | 0.059(-0.243-0.522) | -0.40(-0.64,-0.15) |
| Taiwan (Province of China) | 1292.851(987.049-1614.606) | 1832.103(1227.125-2502.166) | 0.417(0.085-0.786) | 2.17(1.41,2.94) | 11.146(8.565-13.956) | 4.014(2.652-5.459) | -0.640(-0.726--0.549) | -2.42(-3.13,-1.71) |
| Tajikistan | 402.515(231.729-612.399) | 384.579(205.293-629.380) | -0.045(-0.368-0.359) | -1.49(-2.24,-0.73) | 16.955(9.636-26.081) | 10.072(5.581-16.125) | -0.406(-0.611--0.131) | -2.91(-3.79,-2.03) |
| Thailand | 3784.716(1625.761-5876.671) | 5250.658(2813.993-7759.991) | 0.387(0.051-1.104) | 0.48(0.24,0.72) | 11.987(5.543-18.496) | 4.923(2.639-7.283) | -0.589(-0.682--0.410) | -3.40(-3.62,-3.18) |
| Timor-Leste | 105.052(51.167-156.920) | 268.574(135.927-407.996) | 1.557(0.884-2.709) | 3.35(3.19,3.51) | 43.066(23.086-63.566) | 35.450(18.305-53.056) | -0.177(-0.393-0.164) | -0.61(-0.77,-0.46) |
| Togo | 365.184(190.038-523.989) | 1198.560(619.590-1824.482) | 2.282(1.408-3.450) | 3.99(3.79,4.19) | 32.386(17.455-45.864) | 34.558(18.334-52.087) | 0.067(-0.203-0.407) | 0.23(0.02,0.44) |
| Tokelau | 0.650(0.351-0.947) | 0.409(0.230-0.587) | -0.370(-0.499--0.198) | -1.64(-1.71,-1.58) | 52.307(29.328-75.373) | 28.009(15.772-40.232) | -0.465(-0.579--0.322) | -2.11(-2.15,-2.07) |
| Tonga | 10.421(4.900-15.661) | 12.370(6.012-18.619) | 0.187(-0.112-0.568) | 0.61(0.47,0.75) | 20.384(9.884-30.641) | 15.762(7.748-23.777) | -0.227(-0.414-0.000) | -0.72(-0.83,-0.62) |
| Trinidad and Tobago | 260.918(178.193-340.587) | 272.677(178.274-379.616) | 0.045(-0.200-0.317) | -0.61(-0.96,-0.25) | 36.773(25.775-47.568) | 14.729(9.581-20.394) | -0.599(-0.695--0.493) | -3.51(-3.83,-3.18) |
| Tunisia | 847.308(572.432-1193.767) | 1135.995(545.496-1970.562) | 0.341(-0.229-1.283) | 0.38(0.16,0.60) | 23.084(15.859-33.072) | 10.426(5.048-18.039) | -0.548(-0.732--0.236) | -3.01(-3.17,-2.84) |
| Türkiye | 536.629(127.677-1267.682) | 346.736(19.654-1158.825) | -0.354(-0.929-1.137) | 0.69(-0.17,1.55) | 2.180(0.513-5.140) | 0.478(0.026-1.623) | -0.781(-0.978--0.212) | -3.33(-4.01,-2.65) |
| Turkmenistan | 219.888(123.332-331.485) | 81.952(24.617-167.977) | -0.627(-0.843--0.385) | -5.41(-6.64,-4.15) | 13.581(7.658-20.218) | 2.709(0.878-5.580) | -0.801(-0.915--0.671) | -7.29(-8.49,-6.08) |
| Tuvalu | 4.299(2.087-6.098) | 4.185(2.191-6.036) | -0.026(-0.210-0.218) | -0.01(-0.12,0.11) | 72.359(37.540-100.289) | 44.046(22.814-63.086) | -0.391(-0.505--0.235) | -1.48(-1.57,-1.38) |
| Uganda | 1960.953(920.512-3098.430) | 2930.554(1472.032-4418.869) | 0.494(0.083-1.117) | 0.60(0.30,0.91) | 35.336(18.257-54.407) | 24.159(13.206-36.392) | -0.316(-0.499--0.027) | -1.81(-2.04,-1.58) |
| Ukraine | 6185.814(3100.127-9719.508) | 5653.091(2473.518-9981.477) | -0.086(-0.359-0.197) | -1.85(-2.53,-1.17) | 9.388(4.708-14.961) | 7.179(3.105-12.644) | -0.235(-0.459-0.014) | -2.47(-3.27,-1.67) |
| United Arab Emirates | 4.439(1.218-10.250) | 239.882(148.829-347.802) | 53.036(26.694-166.183) | 15.40(13.69,17.13) | 2.696(0.935-5.401) | 13.515(8.665-19.050) | 4.013(1.825-11.625) | 8.14(6.52,9.79) |
| United Kingdom | 7801.159(4075.343-11534.348) | 4280.497(2764.475-5999.968) | -0.451(-0.525--0.300) | -1.90(-2.17,-1.64) | 8.514(4.451-12.527) | 2.985(1.953-4.162) | -0.649(-0.692--0.556) | -3.40(-3.62,-3.18) |
| United Republic of Tanzania | 3235.403(1944.233-4385.472) | 5172.483(2951.093-7584.367) | 0.599(0.178-1.228) | 1.07(0.90,1.25) | 38.067(23.766-50.891) | 25.803(14.795-38.526) | -0.322(-0.497--0.058) | -1.62(-1.76,-1.47) |
| United States of America | 22551.986(13158.217-33356.899) | 38726.728(27488.433-50967.508) | 0.717(0.434-1.314) | 2.15(2.01,2.29) | 7.015(4.121-10.331) | 6.514(4.688-8.531) | -0.071(-0.223-0.252) | 0.15(0.03,0.27) |
| United States Virgin Islands | 16.019(11.419-20.981) | 17.661(11.797-24.111) | 0.103(-0.181-0.499) | 0.53(0.32,0.74) | 23.584(17.020-30.830) | 10.758(7.254-14.761) | -0.544(-0.654--0.400) | -2.22(-2.39,-2.05) |
| Uruguay | 550.669(315.053-783.111) | 543.027(396.314-687.979) | -0.014(-0.228-0.408) | -0.04(-0.28,0.21) | 14.382(8.133-20.447) | 8.292(6.035-10.476) | -0.423(-0.539--0.193) | -1.75(-1.99,-1.51) |
| Uzbekistan | 795.424(397.197-1302.725) | 200.439(40.846-461.327) | -0.748(-0.924--0.513) | -7.13(-8.42,-5.82) | 7.512(3.796-12.139) | 1.383(0.305-3.187) | -0.816(-0.942--0.654) | -7.47(-8.60,-6.32) |
| Vanuatu | 22.424(9.479-35.036) | 57.555(27.149-86.324) | 1.567(0.943-2.327) | 2.99(2.92,3.06) | 38.135(17.541-57.702) | 34.537(16.592-51.454) | -0.094(-0.283-0.137) | -0.37(-0.42,-0.32) |
| Venezuela (Bolivarian Republic of) | 1949.112(1310.802-2588.366) | 3827.573(2427.690-5340.347) | 0.964(0.482-1.460) | 1.95(1.58,2.32) | 21.911(15.078-29.073) | 13.465(8.604-18.608) | -0.385(-0.534--0.233) | -1.95(-2.37,-1.53) |
| Viet Nam | 9192.561(5007.119-13199.959) | 7678.477(4969.238-11209.151) | -0.165(-0.417-0.226) | -0.64(-1.32,0.05) | 24.942(14.131-35.981) | 9.194(5.936-13.364) | -0.631(-0.741--0.482) | -3.30(-3.89,-2.71) |
| Yemen | 2427.299(1448.859-3422.163) | 5763.595(3292.896-8618.018) | 1.374(0.709-2.594) | 2.61(2.44,2.78) | 61.792(39.438-87.315) | 50.517(30.293-75.250) | -0.182(-0.406-0.248) | -0.92(-1.08,-0.77) |
| Zambia | 1363.624(903.353-1863.812) | 2724.677(1623.248-3879.092) | 0.998(0.425-1.671) | 1.97(1.80,2.13) | 61.469(43.008-81.330) | 52.134(32.553-72.394) | -0.152(-0.380-0.137) | -0.84(-1.03,-0.66) |
| Zimbabwe | 1110.549(665.083-1568.236) | 2664.862(1438.976-3993.031) | 1.400(0.769-2.092) | 3.14(2.62,3.66) | 33.770(21.265-47.018) | 44.109(25.213-65.216) | 0.306(-0.010-0.674) | 1.52(1.02,2.02) |

Table 5：Cardiovascular disease DALY attributable to a diet low in vegetables in 204 countries from 1990 to 2021

|  | Number | | PC | EAPC | Rate | | PC | EAPC |
| --- | --- | --- | --- | --- | --- | --- | --- | --- |
| location | 1990 | 2021 | 1990-2021 | 1990-2021 | 1990 | 2021 | 1990-2021 | 1990-2021 |
| Afghanistan | 186609.804(102382.517-268796.997) | 218938.407(119793.158-317120.201) | 0.173(-0.081-0.611) | 0.09(-0.10,0.27) | 2695.659(1495.792-3860.373) | 1891.765(1118.170-2688.422) | -0.298(-0.442--0.066) | -1.41(-1.64,-1.18) |
| Albania | 3349.113(2000.935-4749.179) | 820.330(253.855-1725.019) | -0.755(-0.910--0.571) | -6.17(-6.99,-5.34) | 169.340(101.602-238.748) | 21.241(6.849-43.270) | -0.875(-0.952--0.788) | -7.95(-8.64,-7.25) |
| Algeria | 73217.258(48333.740-101467.867) | 112607.407(71035.868-163094.140) | 0.538(0.191-1.016) | 1.24(1.14,1.35) | 671.171(447.966-921.691) | 353.990(226.399-499.773) | -0.473(-0.593--0.310) | -2.03(-2.12,-1.94) |
| American Samoa | 139.158(74.457-198.953) | 227.745(114.283-337.469) | 0.637(0.310-1.019) | 1.37(1.23,1.51) | 544.127(301.040-756.243) | 458.664(233.732-671.207) | -0.157(-0.330-0.031) | -0.64(-0.82,-0.46) |
| Andorra | 45.193(24.860-73.641) | 77.511(46.673-118.299) | 0.715(0.103-1.720) | 1.64(1.38,1.90) | 86.719(48.940-140.422) | 46.339(28.163-69.786) | -0.466(-0.655--0.153) | -1.80(-2.08,-1.52) |
| Angola | 59216.135(33195.760-84941.285) | 69201.768(44208.469-98467.228) | 0.169(-0.197-0.849) | -0.35(-0.69,-0.00) | 1444.589(875.137-2018.896) | 615.512(399.543-843.441) | -0.574(-0.700--0.352) | -3.55(-3.85,-3.24) |
| Antigua and Barbuda | 258.334(199.290-325.774) | 445.996(356.021-539.370) | 0.726(0.470-1.027) | 2.01(1.59,2.44) | 483.118(372.809-606.906) | 439.463(349.736-538.348) | -0.090(-0.223-0.064) | -0.12(-0.49,0.25) |
| Argentina | 102885.473(74363.747-131289.281) | 82359.322(63426.194-104673.430) | -0.200(-0.310--0.072) | -0.57(-0.82,-0.33) | 327.753(237.060-418.730) | 145.835(112.732-185.582) | -0.555(-0.614--0.486) | -2.48(-2.72,-2.24) |
| Armenia | 2820.247(1306.905-4906.837) | 295.296(23.637-827.646) | -0.895(-0.986--0.745) | -11.33(-12.99,-9.64) | 114.685(54.611-194.009) | 6.871(0.611-19.023) | -0.940(-0.992--0.863) | -12.58(-14.03,-11.10) |
| Australia | 28260.306(15182.134-41177.365) | 20193.190(12464.206-28088.438) | -0.285(-0.372--0.119) | -1.10(-1.33,-0.86) | 147.324(78.955-214.919) | 44.798(27.864-62.024) | -0.696(-0.732--0.632) | -3.78(-4.00,-3.56) |
| Austria | 22211.083(13447.010-31115.828) | 16743.393(11439.827-23007.397) | -0.246(-0.394--0.025) | -0.66(-1.00,-0.32) | 192.491(118.460-269.362) | 80.996(54.891-111.144) | -0.579(-0.649--0.478) | -2.67(-2.95,-2.39) |
| Azerbaijan | 15880.371(9554.814-23773.796) | 4409.746(1444.072-9231.824) | -0.722(-0.887--0.533) | -6.65(-8.05,-5.22) | 326.941(198.696-485.297) | 52.919(18.373-107.137) | -0.838(-0.931--0.741) | -8.02(-9.34,-6.69) |
| Bahamas | 749.455(547.760-976.400) | 2230.424(1634.799-3066.577) | 1.976(1.281-2.956) | 3.70(3.47,3.93) | 458.479(333.603-595.312) | 545.806(402.174-754.057) | 0.190(-0.089-0.559) | 0.63(0.42,0.85) |
| Bahrain | 509.064(289.837-762.834) | 717.823(347.693-1189.182) | 0.410(-0.089-1.032) | 0.84(0.66,1.02) | 302.619(176.177-454.331) | 98.309(51.556-155.962) | -0.675(-0.786--0.531) | -4.06(-4.25,-3.88) |
| Bangladesh | 623287.568(254543.468-913229.648) | 707211.683(319434.654-1092380.954) | 0.135(-0.126-0.570) | 0.32(0.15,0.49) | 1198.733(525.753-1754.795) | 517.306(246.784-798.461) | -0.568(-0.670--0.413) | -2.92(-3.21,-2.63) |
| Barbados | 849.145(622.066-1091.406) | 924.991(653.247-1253.111) | 0.089(-0.127-0.361) | 0.44(0.06,0.82) | 302.320(220.181-387.161) | 186.162(131.816-250.933) | -0.384(-0.504--0.228) | -1.36(-1.65,-1.07) |
| Belarus | 33487.827(17784.956-49515.377) | 15712.954(6212.136-28207.132) | -0.531(-0.705--0.358) | -4.11(-5.00,-3.21) | 266.410(141.308-393.022) | 100.061(39.242-180.566) | -0.624(-0.763--0.491) | -4.83(-5.74,-3.92) |
| Belgium | 15952.115(8540.558-24212.161) | 6146.925(3357.024-9523.932) | -0.615(-0.687--0.524) | -3.07(-3.20,-2.93) | 108.127(58.243-162.506) | 24.785(13.549-38.338) | -0.771(-0.813--0.721) | -4.79(-4.90,-4.67) |
| Belize | 379.328(248.841-503.583) | 1105.274(832.700-1375.569) | 1.914(1.398-2.669) | 3.94(3.63,4.24) | 395.516(262.497-523.501) | 354.820(269.066-443.425) | -0.103(-0.255-0.125) | -0.08(-0.31,0.16) |
| Benin | 8399.293(5501.299-11483.592) | 17184.424(11676.772-24075.127) | 1.046(0.471-1.797) | 2.43(2.27,2.59) | 411.594(273.375-565.024) | 313.901(214.048-433.083) | -0.237(-0.444-0.029) | -0.81(-0.90,-0.72) |
| Bermuda | 122.394(73.231-178.620) | 145.807(101.602-197.591) | 0.191(-0.043-0.567) | 0.76(0.38,1.15) | 200.648(119.779-293.165) | 107.481(74.436-146.584) | -0.464(-0.567--0.297) | -1.89(-2.23,-1.54) |
| Bhutan | 1411.558(695.556-2100.479) | 1712.551(1069.174-2400.097) | 0.213(-0.123-0.788) | 0.54(0.39,0.70) | 552.476(302.083-821.176) | 282.919(179.340-396.209) | -0.488(-0.620--0.264) | -2.27(-2.43,-2.12) |
| Bolivia (Plurinational State of) | 15519.923(8917.406-22633.008) | 26296.939(15093.537-38438.077) | 0.694(0.307-1.269) | 1.96(1.88,2.04) | 483.525(288.158-695.917) | 295.248(177.661-429.948) | -0.389(-0.526--0.182) | -1.51(-1.59,-1.43) |
| Bosnia and Herzegovina | 9172.181(5554.480-13128.681) | 5114.561(2698.538-8040.448) | -0.442(-0.627--0.253) | -2.53(-2.87,-2.18) | 228.177(137.713-325.716) | 82.991(43.004-130.165) | -0.636(-0.756--0.515) | -3.90(-4.31,-3.48) |
| Botswana | 5338.968(3038.444-7913.567) | 7460.428(4896.378-10486.064) | 0.397(-0.035-1.179) | 1.05(0.84,1.25) | 965.007(566.681-1397.426) | 518.019(353.248-711.936) | -0.463(-0.625--0.171) | -1.88(-2.10,-1.66) |
| Brazil | 476863.093(299408.705-639744.368) | 477751.030(338106.184-620378.143) | 0.002(-0.107-0.207) | 0.01(-0.21,0.22) | 506.030(316.738-673.887) | 190.002(135.024-246.660) | -0.625(-0.663--0.560) | -3.15(-3.36,-2.95) |
| Brunei Darussalam | 405.535(269.158-545.949) | 728.918(481.297-983.429) | 0.797(0.490-1.203) | 1.98(1.65,2.32) | 343.362(229.562-463.372) | 206.465(141.739-275.938) | -0.399(-0.505--0.260) | -1.35(-1.63,-1.07) |
| Bulgaria | 29706.699(17897.629-44873.111) | 29166.273(14832.550-47450.016) | -0.018(-0.375-0.460) | -0.79(-1.28,-0.30) | 272.243(169.179-415.821) | 216.149(111.305-358.340) | -0.206(-0.485-0.172) | -1.50(-2.04,-0.96) |
| Burkina Faso | 33160.614(18966.283-45708.403) | 74236.697(41143.028-105633.561) | 1.239(0.636-2.020) | 3.06(2.94,3.18) | 745.899(440.254-1029.102) | 764.382(440.085-1077.107) | 0.025(-0.237-0.377) | 0.44(0.33,0.55) |
| Burundi | 32184.133(14083.484-47598.437) | 37589.379(18197.465-54729.180) | 0.168(-0.124-0.709) | -0.11(-0.56,0.34) | 1319.063(615.146-1940.152) | 708.735(366.918-1021.463) | -0.463(-0.596--0.216) | -2.66(-2.93,-2.38) |
| Cabo Verde | 970.877(635.760-1352.823) | 934.042(621.391-1290.753) | -0.038(-0.328-0.330) | -0.67(-1.14,-0.19) | 435.816(284.676-609.314) | 205.098(137.054-284.833) | -0.529(-0.666--0.349) | -3.02(-3.52,-2.52) |
| Cambodia | 55017.974(28360.171-79598.389) | 102524.031(55904.739-149401.548) | 0.863(0.394-1.567) | 1.95(1.87,2.02) | 1150.342(631.092-1677.795) | 810.484(458.400-1173.300) | -0.295(-0.469--0.048) | -1.30(-1.41,-1.19) |
| Cameroon | 26601.452(17182.710-35168.248) | 45300.235(25660.459-69099.989) | 0.703(0.139-1.436) | 1.40(1.20,1.60) | 587.202(380.180-781.930) | 331.395(191.295-504.364) | -0.436(-0.613--0.196) | -2.19(-2.39,-1.98) |
| Canada | 35528.614(18464.584-53416.824) | 38194.095(23805.828-54000.023) | 0.075(-0.063-0.396) | 0.43(0.20,0.67) | 111.580(58.074-167.562) | 57.652(37.499-80.139) | -0.483(-0.554--0.319) | -1.97(-2.23,-1.71) |
| Central African Republic | 21387.476(11041.298-31435.910) | 36698.372(18061.057-56252.884) | 0.716(0.294-1.189) | 1.73(1.66,1.80) | 1774.584(949.814-2560.984) | 1521.700(818.012-2306.060) | -0.143(-0.331-0.065) | -0.58(-0.64,-0.51) |
| Chad | 27959.545(14630.642-40283.977) | 65646.609(33410.141-99168.036) | 1.348(0.804-2.072) | 2.72(2.53,2.90) | 964.549(519.269-1389.350) | 1026.244(544.995-1543.293) | 0.064(-0.181-0.381) | 0.11(-0.16,0.37) |
| Chile | 15509.747(10650.464-20942.074) | 17729.910(12470.690-24053.456) | 0.143(-0.025-0.333) | 0.96(0.77,1.15) | 158.551(108.825-214.043) | 69.729(49.427-94.458) | -0.560(-0.622--0.489) | -2.13(-2.31,-1.94) |
| China | 2870500.741(2073499.236-3771634.263) | 481279.442(204982.919-894442.649) | -0.832(-0.919--0.705) | -6.60(-7.15,-6.04) | 391.191(278.679-507.010) | 27.663(11.875-50.735) | -0.929(-0.966--0.880) | -8.99(-9.37,-8.60) |
| Colombia | 66888.738(47802.905-85246.718) | 66935.796(42477.621-92923.691) | 0.001(-0.199-0.195) | -0.51(-0.71,-0.32) | 383.512(280.276-488.018) | 120.131(76.184-166.879) | -0.687(-0.753--0.626) | -4.24(-4.47,-4.01) |
| Comoros | 2652.716(1339.543-3942.022) | 4011.510(1979.551-5818.855) | 0.512(0.083-1.088) | 1.01(0.71,1.30) | 1299.242(704.380-1881.446) | 803.200(418.676-1175.021) | -0.382(-0.549--0.154) | -1.87(-2.12,-1.62) |
| Congo | 18870.226(10142.898-27493.028) | 33308.894(18607.318-50420.132) | 0.765(0.307-1.364) | 1.55(1.34,1.75) | 1731.843(976.686-2470.116) | 1163.209(673.758-1728.868) | -0.328(-0.485--0.109) | -1.58(-1.73,-1.43) |
| Cook Islands | 217.921(168.193-282.428) | 182.504(135.424-237.536) | -0.163(-0.375-0.131) | -0.46(-0.62,-0.30) | 1738.179(1358.475-2207.964) | 748.053(550.555-975.663) | -0.570(-0.679--0.421) | -2.63(-2.81,-2.45) |
| Costa Rica | 5625.484(3114.536-7953.111) | 7181.044(4665.922-9666.488) | 0.277(0.069-0.597) | 0.25(0.03,0.47) | 310.638(176.164-436.943) | 129.181(83.723-174.149) | -0.584(-0.649--0.491) | -3.35(-3.57,-3.12) |
| Croatia | 15990.539(10225.460-22487.842) | 11248.566(6984.867-15948.994) | -0.297(-0.408--0.191) | -0.88(-1.11,-0.65) | 286.313(184.914-398.736) | 126.758(79.870-178.419) | -0.557(-0.627--0.498) | -2.40(-2.59,-2.20) |
| Cuba | 24787.355(15271.656-34824.461) | 32983.597(22336.729-44732.898) | 0.331(0.051-0.818) | 0.72(0.36,1.09) | 244.984(150.809-343.688) | 168.243(114.080-226.811) | -0.313(-0.457--0.052) | -1.46(-1.84,-1.08) |
| Cyprus | 1718.386(1038.899-2440.612) | 1978.806(1299.800-2711.712) | 0.152(-0.095-0.574) | 0.36(0.16,0.55) | 285.287(171.677-410.977) | 115.831(77.446-160.081) | -0.594(-0.697--0.417) | -3.00(-3.27,-2.74) |
| Czechia | 38958.543(20594.183-57544.300) | 29168.833(18896.477-40515.623) | -0.251(-0.371--0.023) | -0.87(-1.05,-0.70) | 289.989(153.601-428.842) | 136.076(87.735-187.512) | -0.531(-0.605--0.393) | -2.45(-2.59,-2.30) |
| C么te d'Ivoire | 23871.748(14499.833-33018.736) | 63434.098(36416.971-93238.821) | 1.657(0.893-2.931) | 3.16(2.90,3.43) | 536.483(330.187-737.229) | 498.517(295.171-723.557) | -0.071(-0.322-0.344) | -0.19(-0.41,0.02) |
| Democratic People's Republic of Korea | 29431.082(17806.578-44265.527) | 89159.705(56392.833-129143.992) | 2.029(1.082-3.635) | 3.83(3.50,4.16) | 213.836(131.297-324.514) | 284.085(181.176-407.569) | 0.329(-0.086-1.037) | 1.08(0.80,1.37) |
| Democratic Republic of the Congo | 186926.320(98914.971-280753.296) | 420121.110(217264.769-611982.796) | 1.248(0.658-1.915) | 2.56(2.45,2.67) | 1166.424(661.985-1713.077) | 1136.358(619.436-1634.010) | -0.026(-0.277-0.270) | -0.10(-0.16,-0.04) |
| Denmark | 13811.969(7232.841-20709.182) | 3916.365(2271.435-5870.823) | -0.716(-0.759--0.647) | -4.42(-4.74,-4.10) | 177.069(94.218-264.506) | 33.231(19.466-49.727) | -0.812(-0.839--0.771) | -5.66(-5.93,-5.39) |
| Djibouti | 1195.472(718.927-1681.443) | 3015.454(1903.316-4563.500) | 1.522(0.678-2.727) | 2.46(2.23,2.68) | 856.646(542.127-1194.838) | 472.110(301.075-707.964) | -0.449(-0.607--0.221) | -2.42(-2.61,-2.23) |
| Dominica | 331.353(257.988-410.540) | 362.570(266.651-470.048) | 0.094(-0.136-0.394) | 0.44(0.10,0.78) | 573.485(448.505-708.658) | 451.007(334.378-582.577) | -0.214(-0.374-0.007) | -0.65(-0.93,-0.38) |
| Dominican Republic | 16743.937(11181.039-22979.677) | 32814.630(21550.558-45211.738) | 0.960(0.525-1.556) | 2.57(2.42,2.72) | 436.076(297.616-595.960) | 321.678(211.007-444.062) | -0.262(-0.430--0.046) | -0.53(-0.75,-0.32) |
| Ecuador | 31934.847(20194.877-42049.797) | 41657.634(27012.354-57544.637) | 0.304(0.001-0.671) | 1.48(1.02,1.94) | 590.130(395.320-764.395) | 267.465(176.416-367.753) | -0.547(-0.646--0.425) | -1.93(-2.38,-1.47) |
| Egypt | 77220.425(36166.358-139260.688) | 9791.435(1258.688-25686.823) | -0.873(-0.969--0.763) | -8.24(-9.94,-6.51) | 357.564(181.624-611.606) | 29.931(4.410-78.263) | -0.916(-0.981--0.837) | -8.56(-9.88,-7.23) |
| El Salvador | 10287.688(4780.459-14932.471) | 8548.262(4952.131-12435.772) | -0.169(-0.343-0.148) | -0.72(-1.26,-0.17) | 326.018(156.260-475.218) | 134.923(77.874-197.298) | -0.586(-0.670--0.437) | -2.98(-3.53,-2.43) |
| Equatorial Guinea | 3386.254(1692.171-5060.093) | 3392.273(1855.616-5441.510) | 0.002(-0.321-0.623) | -0.63(-1.30,0.04) | 1691.847(900.718-2478.612) | 640.112(366.699-1014.961) | -0.622(-0.735--0.405) | -3.81(-4.32,-3.29) |
| Eritrea | 22158.718(12066.488-32211.881) | 31449.148(17139.223-47279.678) | 0.419(0.042-0.981) | 1.45(1.24,1.66) | 1809.310(1073.504-2482.363) | 1086.744(638.059-1558.178) | -0.399(-0.545--0.176) | -1.70(-1.81,-1.59) |
| Estonia | 8103.657(4878.760-11533.140) | 9888.145(6889.946-13455.377) | 0.220(-0.144-0.937) | 1.02(0.70,1.35) | 410.145(248.956-582.433) | 323.502(230.265-443.663) | -0.211(-0.439-0.219) | -0.48(-0.84,-0.11) |
| Eswatini | 3116.995(1809.883-4355.936) | 6278.070(3515.268-9455.468) | 1.014(0.414-1.949) | 2.58(1.81,3.36) | 1071.138(665.046-1494.736) | 1047.235(617.561-1567.542) | -0.022(-0.297-0.400) | 0.40(-0.23,1.03) |
| Ethiopia | 318553.097(189222.911-428089.608) | 261021.642(162742.029-355417.396) | -0.181(-0.368-0.088) | -1.38(-1.66,-1.10) | 1557.491(973.906-2084.670) | 592.024(386.729-803.777) | -0.620(-0.706--0.486) | -3.72(-3.93,-3.51) |
| Fiji | 4889.440(2523.208-6953.045) | 4786.002(2768.186-7093.342) | -0.021(-0.279-0.358) | 0.04(-0.13,0.21) | 1134.170(618.788-1603.332) | 600.714(354.699-873.181) | -0.470(-0.602--0.295) | -2.11(-2.30,-1.93) |
| Finland | 16528.909(9144.512-23980.021) | 14354.328(10073.675-19244.695) | -0.132(-0.297-0.220) | -0.17(-0.56,0.22) | 239.117(132.903-345.677) | 106.399(73.876-141.872) | -0.555(-0.632--0.386) | -2.32(-2.64,-2.01) |
| France | 74720.733(47528.208-104746.398) | 74139.091(52822.161-100139.122) | -0.008(-0.166-0.220) | 0.07(0.02,0.13) | 90.864(57.631-127.561) | 46.843(32.462-63.435) | -0.484(-0.543--0.397) | -2.03(-2.13,-1.94) |
| Gabon | 6127.092(3863.936-8584.843) | 7728.751(4742.305-11206.659) | 0.261(-0.101-0.766) | 0.59(0.47,0.70) | 1102.861(703.828-1533.553) | 765.775(492.205-1089.499) | -0.306(-0.492--0.038) | -1.31(-1.46,-1.16) |
| Gambia | 3283.208(1612.518-4869.277) | 8959.110(4735.435-13251.920) | 1.729(0.989-2.807) | 3.09(2.85,3.33) | 842.691(434.297-1234.220) | 831.003(447.187-1233.018) | -0.014(-0.272-0.365) | -0.20(-0.38,-0.02) |
| Georgia | 14488.087(8066.974-22041.067) | 17786.386(12333.784-23847.038) | 0.228(-0.043-0.756) | 0.77(-0.09,1.63) | 242.593(135.646-368.776) | 299.156(210.483-401.129) | 0.233(-0.028-0.728) | 0.71(-0.10,1.54) |
| Germany | 263243.118(160256.837-368295.893) | 187976.030(129386.425-251000.261) | -0.286(-0.405--0.088) | -0.66(-0.79,-0.52) | 211.753(128.779-295.028) | 88.625(61.250-118.205) | -0.581(-0.639--0.492) | -2.42(-2.54,-2.30) |
| Ghana | 49689.094(28957.920-68859.103) | 86194.358(55660.011-121467.187) | 0.735(0.242-1.523) | 1.72(1.50,1.94) | 713.961(427.445-982.451) | 461.470(299.858-651.337) | -0.354(-0.537--0.074) | -1.47(-1.68,-1.26) |
| Greece | 485.357(50.924-1409.154) | 7397.388(3272.759-13741.482) | 14.241(6.017-110.824) | 11.09(10.39,11.79) | 4.089(0.532-10.995) | 24.340(10.501-45.589) | 4.953(1.833-28.659) | 7.79(7.13,8.45) |
| Greenland | 89.833(54.964-129.565) | 60.847(36.736-92.309) | -0.323(-0.505--0.123) | -1.15(-1.36,-0.94) | 230.721(139.251-331.529) | 89.591(54.642-132.415) | -0.612(-0.707--0.508) | -3.02(-3.14,-2.90) |
| Grenada | 582.369(338.276-798.794) | 557.975(385.241-729.074) | -0.042(-0.212-0.248) | 0.06(-0.24,0.36) | 857.064(485.439-1169.175) | 502.188(350.644-657.953) | -0.414(-0.523--0.219) | -1.60(-1.87,-1.33) |
| Guam | 573.998(392.095-728.230) | 677.639(454.911-927.185) | 0.181(-0.120-0.670) | 0.62(0.30,0.94) | 751.877(508.795-940.794) | 338.658(228.236-463.065) | -0.550(-0.663--0.362) | -2.34(-2.84,-1.83) |
| Guatemala | 9721.009(5286.317-13590.521) | 13350.204(7804.574-18924.472) | 0.373(0.164-0.610) | 0.86(0.24,1.48) | 274.226(161.539-379.071) | 124.330(74.251-175.542) | -0.547(-0.612--0.475) | -2.70(-3.21,-2.18) |
| Guinea | 17251.975(11245.111-24473.886) | 35086.801(21758.095-51789.304) | 1.034(0.335-2.061) | 2.22(1.88,2.56) | 515.832(333.171-731.855) | 583.110(365.135-855.248) | 0.130(-0.243-0.673) | 0.51(0.23,0.78) |
| Guinea-Bissau | 7474.912(3427.247-10945.916) | 12119.923(5822.929-18244.286) | 0.621(0.203-1.213) | 1.62(1.58,1.66) | 1684.329(823.864-2457.983) | 1389.277(691.057-2061.449) | -0.175(-0.370-0.113) | -0.59(-0.73,-0.46) |
| Guyana | 7155.659(4356.588-9638.950) | 5091.627(3605.023-6969.151) | -0.288(-0.491-0.105) | -0.42(-0.99,0.15) | 1784.350(1107.254-2388.096) | 786.260(564.178-1071.550) | -0.559(-0.680--0.343) | -2.09(-2.57,-1.60) |
| Haiti | 47986.512(21914.999-71330.580) | 91101.534(41684.658-140999.309) | 0.898(0.368-1.612) | 2.18(2.13,2.23) | 1397.698(674.552-2074.646) | 1138.878(568.726-1751.394) | -0.185(-0.397-0.089) | -0.59(-0.65,-0.53) |
| Honduras | 11302.425(6389.948-15938.672) | 25124.904(17020.888-33488.798) | 1.223(0.776-2.083) | 2.73(2.51,2.94) | 519.115(308.229-718.433) | 412.932(283.606-549.037) | -0.205(-0.354-0.041) | -0.66(-0.83,-0.48) |
| Hungary | 46462.809(29593.136-65183.583) | 26537.357(16586.187-39086.776) | -0.429(-0.560--0.278) | -1.80(-2.18,-1.42) | 332.989(211.985-463.686) | 136.837(84.157-201.664) | -0.589(-0.682--0.486) | -2.95(-3.28,-2.63) |
| Iceland | 527.318(284.127-764.098) | 362.177(217.755-511.685) | -0.313(-0.408--0.129) | -1.13(-1.30,-0.96) | 186.584(101.892-270.832) | 60.719(36.707-85.258) | -0.675(-0.716--0.594) | -3.56(-3.70,-3.43) |
| India | 1919623.689(1180355.203-2670328.209) | 3625548.107(2341430.181-4904253.915) | 0.889(0.576-1.330) | 2.22(2.10,2.33) | 384.893(244.043-537.394) | 299.064(197.081-401.555) | -0.223(-0.359--0.029) | -0.71(-0.84,-0.58) |
| Indonesia | 853517.220(361807.495-1252664.182) | 1148373.802(656022.239-1619237.727) | 0.345(0.047-0.870) | 0.98(0.86,1.10) | 758.669(345.711-1111.637) | 454.914(260.923-630.777) | -0.400(-0.533--0.172) | -1.57(-1.67,-1.48) |
| Iran (Islamic Republic of) | 113189.696(80383.649-153065.984) | 80922.319(48318.090-125660.636) | -0.285(-0.502--0.062) | -1.42(-1.87,-0.98) | 468.343(334.342-631.138) | 114.084(68.771-175.540) | -0.756(-0.827--0.685) | -4.93(-5.34,-4.51) |
| Iraq | 21670.083(12381.343-33655.945) | 39627.138(20963.835-64273.174) | 0.829(0.229-1.657) | 0.50(0.03,0.98) | 263.894(152.187-412.596) | 178.851(98.210-283.659) | -0.322(-0.530--0.037) | -2.84(-3.33,-2.35) |
| Ireland | 7958.354(4239.842-11785.354) | 2981.419(1640.016-4470.495) | -0.625(-0.674--0.558) | -3.15(-3.32,-2.97) | 201.349(107.820-299.318) | 37.911(20.748-56.637) | -0.812(-0.835--0.782) | -5.34(-5.49,-5.18) |
| Israel | 1702.915(724.027-3233.839) | 536.950(155.373-1143.474) | -0.685(-0.847--0.485) | -3.30(-4.82,-1.75) | 36.975(15.722-70.045) | 3.817(1.110-8.182) | -0.897(-0.950--0.839) | -6.81(-8.23,-5.37) |
| Italy | 52935.045(30295.933-79219.065) | 149889.421(101331.093-206735.606) | 1.832(1.165-2.945) | 4.23(3.97,4.48) | 62.707(35.901-94.069) | 81.505(55.921-110.976) | 0.300(0.024-0.746) | 1.59(1.35,1.84) |
| Jamaica | 8879.455(7159.363-10659.017) | 10712.950(7824.236-14146.709) | 0.206(-0.071-0.554) | 1.35(0.66,2.04) | 496.161(401.666-591.510) | 335.905(242.464-441.573) | -0.323(-0.483--0.129) | -0.57(-1.30,0.17) |
| Japan | 93907.523(60360.031-134315.587) | 69405.697(39325.996-107741.532) | -0.261(-0.444--0.067) | -0.34(-0.98,0.30) | 59.061(37.756-84.537) | 17.979(10.779-27.177) | -0.696(-0.751--0.642) | -3.17(-3.78,-2.56) |
| Jordan | 6888.901(4833.288-9487.363) | 17937.241(12036.974-24983.521) | 1.604(0.916-2.505) | 2.60(2.39,2.82) | 520.607(373.165-704.714) | 256.654(168.059-348.902) | -0.507(-0.646--0.333) | -2.72(-2.97,-2.48) |
| Kazakhstan | 36032.672(20995.415-52352.347) | 7204.693(2736.154-14273.968) | -0.800(-0.895--0.695) | -8.11(-9.64,-6.55) | 278.721(160.209-409.048) | 48.928(19.679-94.693) | -0.824(-0.899--0.742) | -8.31(-9.82,-6.76) |
| Kenya | 33845.307(23070.558-44881.077) | 78052.680(53872.128-104324.174) | 1.306(0.806-1.901) | 3.12(2.97,3.27) | 414.697(291.014-549.302) | 360.098(247.837-484.573) | -0.132(-0.329-0.094) | -0.09(-0.24,0.05) |
| Kiribati | 365.548(154.181-544.621) | 647.810(286.025-1014.241) | 0.772(0.350-1.387) | 1.94(1.88,2.01) | 853.361(390.327-1267.895) | 753.512(350.698-1166.769) | -0.117(-0.308-0.156) | -0.43(-0.48,-0.38) |
| Kuwait | 1483.464(837.345-2269.878) | 1693.143(672.778-3107.881) | 0.141(-0.319-0.614) | 0.77(-0.95,2.52) | 213.134(125.933-318.474) | 51.775(21.468-93.643) | -0.757(-0.846--0.669) | -4.41(-5.81,-2.99) |
| Kyrgyzstan | 6282.645(3752.013-9422.276) | 6316.889(3217.849-10471.759) | 0.005(-0.339-0.360) | -1.43(-2.01,-0.84) | 213.178(126.971-319.616) | 140.733(72.379-227.059) | -0.340(-0.556--0.114) | -2.54(-3.12,-1.96) |
| Lao People's Democratic Republic | 45100.322(20832.850-67523.610) | 24701.648(15901.600-34541.040) | -0.452(-0.617--0.114) | -2.52(-3.06,-1.98) | 1991.321(948.013-2961.056) | 516.278(335.844-717.025) | -0.741(-0.816--0.597) | -4.80(-5.24,-4.36) |
| Latvia | 8607.432(4341.994-13126.999) | 6843.813(4422.846-9757.978) | -0.205(-0.352-0.117) | -1.28(-1.70,-0.86) | 248.385(125.686-378.791) | 173.036(112.493-244.812) | -0.303(-0.432--0.045) | -1.78(-2.25,-1.31) |
| Lebanon | 294.551(46.995-741.381) | 1050.112(259.494-2231.500) | 2.565(0.308-12.622) | 6.69(5.58,7.82) | 21.469(3.794-50.206) | 15.380(3.787-32.591) | -0.284(-0.743-1.533) | 0.34(-0.33,1.02) |
| Lesotho | 7038.952(4382.714-9726.242) | 13855.012(7796.588-19923.271) | 0.968(0.337-1.854) | 2.98(2.33,3.64) | 856.664(543.487-1184.744) | 1274.560(743.753-1813.137) | 0.488(0.028-1.116) | 2.23(1.67,2.79) |
| Liberia | 9178.753(5097.416-12965.682) | 20236.591(9962.210-31032.719) | 1.205(0.578-2.104) | 2.41(2.20,2.61) | 765.697(429.077-1068.666) | 808.519(421.127-1220.090) | 0.056(-0.233-0.440) | -0.13(-0.36,0.10) |
| Libya | 4166.364(2367.037-6521.065) | 16580.576(9961.101-26189.191) | 2.980(1.883-4.660) | 4.93(4.61,5.26) | 210.109(120.886-328.598) | 300.440(180.673-474.057) | 0.430(0.043-1.035) | 1.49(1.19,1.78) |
| Lithuania | 12598.810(6703.504-18891.381) | 8158.363(4699.129-12178.907) | -0.352(-0.462--0.193) | -1.68(-1.96,-1.40) | 286.410(152.745-428.169) | 142.458(83.502-212.389) | -0.503(-0.590--0.376) | -2.50(-2.81,-2.20) |
| Luxembourg | 811.379(465.712-1171.788) | 545.165(361.871-765.247) | -0.328(-0.445--0.126) | -1.32(-1.57,-1.06) | 154.356(89.671-222.122) | 47.513(31.424-67.399) | -0.692(-0.742--0.608) | -3.83(-3.99,-3.67) |
| Madagascar | 91872.902(52675.896-126383.065) | 185438.427(97136.716-273850.920) | 1.018(0.499-1.666) | 2.26(2.14,2.38) | 1713.508(1027.451-2321.964) | 1447.055(793.281-2084.298) | -0.156(-0.361-0.102) | -0.67(-0.74,-0.60) |
| Malawi | 30617.567(15982.664-44290.923) | 57049.339(28946.549-84078.321) | 0.863(0.483-1.368) | 1.54(1.33,1.74) | 775.496(432.495-1100.211) | 716.379(390.910-1030.321) | -0.076(-0.255-0.174) | -0.66(-0.89,-0.43) |
| Malaysia | 52344.606(20871.250-78721.449) | 61796.727(35305.966-88044.187) | 0.181(0.007-0.706) | 0.56(0.25,0.87) | 514.561(213.586-775.541) | 210.530(119.646-301.032) | -0.591(-0.650--0.425) | -2.92(-3.21,-2.62) |
| Maldives | 478.590(259.116-683.198) | 485.368(305.797-658.144) | 0.014(-0.232-0.463) | -0.58(-1.06,-0.09) | 493.063(279.438-701.402) | 125.816(81.232-171.587) | -0.745(-0.807--0.622) | -4.91(-5.22,-4.60) |
| Mali | 31996.418(16991.240-45656.042) | 52874.126(28815.619-76157.416) | 0.653(0.232-1.287) | 1.85(1.65,2.04) | 748.733(406.182-1058.563) | 538.485(289.276-765.394) | -0.281(-0.446--0.010) | -1.01(-1.10,-0.93) |
| Malta | 614.638(339.858-917.071) | 348.134(177.061-544.494) | -0.434(-0.598--0.247) | -1.63(-1.88,-1.37) | 147.745(82.491-218.384) | 33.784(17.146-53.174) | -0.771(-0.838--0.703) | -4.46(-4.67,-4.26) |
| Marshall Islands | 300.275(141.638-430.393) | 564.767(268.841-860.446) | 0.881(0.412-1.429) | 2.10(1.95,2.26) | 1639.879(819.964-2331.134) | 1348.503(673.667-2023.315) | -0.178(-0.374-0.044) | -0.62(-0.73,-0.51) |
| Mauritania | 13193.675(6309.370-19338.546) | 15040.439(8363.125-22596.811) | 0.140(-0.161-0.640) | 0.05(-0.15,0.26) | 1266.632(625.895-1852.756) | 672.482(386.685-994.830) | -0.469(-0.611--0.239) | -2.43(-2.60,-2.26) |
| Mauritius | 5778.295(4086.587-7400.326) | 5162.039(3920.792-6619.536) | -0.107(-0.227-0.050) | -0.09(-0.57,0.40) | 759.959(545.919-972.339) | 298.721(225.808-380.631) | -0.607(-0.656--0.544) | -2.78(-3.28,-2.28) |
| Mexico | 88824.887(59969.450-117460.749) | 184514.247(116687.847-259884.884) | 1.077(0.766-1.380) | 2.43(2.03,2.84) | 218.044(152.162-286.557) | 148.138(94.461-208.368) | -0.321(-0.428--0.217) | -1.30(-1.68,-0.92) |
| Micronesia (Federated States of) | 947.977(447.110-1385.778) | 1127.513(572.201-1719.963) | 0.189(-0.144-0.662) | 0.59(0.49,0.68) | 1797.705(906.130-2576.763) | 1367.311(702.487-2043.484) | -0.239(-0.445-0.049) | -0.87(-0.93,-0.80) |
| Monaco | 23.496(9.557-45.463) | 14.085(5.026-28.870) | -0.401(-0.731-0.087) | -1.31(-1.71,-0.92) | 32.918(13.199-63.212) | 12.841(4.515-25.253) | -0.610(-0.817--0.319) | -2.66(-3.00,-2.32) |
| Mongolia | 12702.541(4170.192-20265.779) | 6934.495(3415.805-10362.782) | -0.454(-0.561--0.146) | -3.04(-3.39,-2.69) | 1173.435(395.425-1871.230) | 295.050(146.593-434.777) | -0.749(-0.795--0.617) | -5.54(-5.97,-5.11) |
| Montenegro | 244.674(94.813-464.930) | 203.389(70.128-421.267) | -0.169(-0.517-0.343) | -3.49(-4.79,-2.18) | 40.833(16.018-76.373) | 26.091(9.573-51.234) | -0.361(-0.598-0.048) | -4.29(-5.52,-3.04) |
| Morocco | 86230.459(55353.988-119419.593) | 87490.772(48672.327-141008.604) | 0.015(-0.310-0.342) | -0.09(-0.50,0.32) | 591.042(382.347-820.489) | 267.785(150.482-424.290) | -0.547(-0.682--0.403) | -2.64(-3.01,-2.28) |
| Mozambique | 70808.080(35634.417-99745.708) | 125290.599(58805.768-189726.603) | 0.769(0.313-1.332) | 2.22(2.09,2.35) | 1188.901(656.064-1673.812) | 1077.965(527.607-1588.542) | -0.093(-0.337-0.180) | 0.02(-0.11,0.15) |
| Myanmar | 298065.657(143091.538-449960.576) | 183050.759(113509.082-261203.147) | -0.386(-0.573--0.043) | -2.31(-2.63,-1.99) | 1191.494(607.035-1783.372) | 375.277(233.496-536.327) | -0.685(-0.780--0.522) | -4.36(-4.65,-4.07) |
| Namibia | 7842.949(4519.953-11101.371) | 9802.562(6175.409-13999.767) | 0.250(-0.147-0.816) | 0.01(-0.37,0.39) | 1211.546(726.349-1707.152) | 743.960(476.032-1049.138) | -0.386(-0.578--0.117) | -2.09(-2.41,-1.78) |
| Nauru | 80.089(40.375-117.071) | 95.717(47.072-149.140) | 0.195(-0.092-0.570) | 0.35(-0.37,1.08) | 1404.502(742.220-2033.547) | 1339.513(682.594-2057.550) | -0.046(-0.262-0.239) | -0.22(-0.86,0.44) |
| Nepal | 62782.493(31008.349-92790.002) | 81106.102(53672.892-112700.489) | 0.292(-0.071-1.067) | 0.94(0.40,1.48) | 641.598(342.199-933.973) | 370.721(251.521-510.338) | -0.422(-0.579--0.092) | -1.75(-2.27,-1.23) |
| Netherlands | 27236.821(14731.491-39695.446) | 15135.453(9464.385-20973.626) | -0.444(-0.517--0.306) | -2.09(-2.23,-1.96) | 140.470(76.723-204.317) | 42.648(26.736-59.078) | -0.696(-0.732--0.627) | -4.02(-4.14,-3.91) |
| New Zealand | 5922.253(3172.146-8800.727) | 4216.243(2487.811-6098.611) | -0.288(-0.363--0.184) | -1.23(-1.34,-1.13) | 154.885(83.016-229.042) | 51.124(30.284-73.460) | -0.670(-0.702--0.625) | -3.68(-3.78,-3.58) |
| Nicaragua | 7663.361(3796.033-10825.581) | 14918.735(7955.975-21993.929) | 0.947(0.625-1.374) | 2.06(1.87,2.25) | 464.158(245.034-652.866) | 299.437(164.266-434.039) | -0.355(-0.459--0.227) | -1.47(-1.63,-1.31) |
| Niger | 11917.202(6789.332-17196.167) | 24803.162(13564.286-37388.179) | 1.081(0.484-2.173) | 2.43(2.12,2.75) | 412.125(235.549-591.889) | 294.262(162.011-445.862) | -0.286(-0.487-0.077) | -1.13(-1.39,-0.87) |
| Nigeria | 228514.239(154749.740-317713.880) | 245887.499(150186.272-336032.787) | 0.076(-0.290-0.481) | -0.50(-0.88,-0.12) | 519.967(358.785-715.836) | 256.854(159.495-344.750) | -0.506(-0.665--0.338) | -2.99(-3.34,-2.63) |
| Niue | 19.769(10.180-29.412) | 13.380(7.079-20.191) | -0.323(-0.480--0.128) | -1.71(-1.91,-1.52) | 923.519(475.198-1379.891) | 640.973(337.934-967.183) | -0.306(-0.467--0.095) | -1.48(-1.58,-1.38) |
| North Macedonia | 1688.957(769.185-2965.954) | 1542.931(548.262-3085.106) | -0.086(-0.467-0.441) | -1.26(-2.03,-0.48) | 103.381(48.077-177.502) | 65.612(25.834-126.526) | -0.365(-0.610-0.002) | -2.51(-3.38,-1.63) |
| Northern Mariana Islands | 85.654(42.251-128.310) | 164.048(90.165-234.191) | 0.915(0.455-1.534) | 2.56(2.31,2.81) | 340.051(180.605-499.588) | 297.013(164.123-423.804) | -0.127(-0.310-0.099) | -0.19(-0.41,0.04) |
| Norway | 11923.003(6224.334-17429.453) | 4522.651(2700.191-6559.709) | -0.621(-0.666--0.539) | -3.30(-3.46,-3.13) | 184.438(97.170-271.255) | 43.428(25.769-62.808) | -0.765(-0.789--0.717) | -4.77(-4.88,-4.66) |
| Oman | 4172.908(2588.618-6097.172) | 5854.870(3843.518-8181.962) | 0.403(-0.076-1.067) | 1.07(0.60,1.55) | 615.943(397.183-905.834) | 291.726(193.721-407.218) | -0.526(-0.694--0.284) | -2.25(-2.59,-1.90) |
| Pakistan | 369211.145(187168.290-542468.928) | 718741.516(391351.684-1091802.143) | 0.947(0.581-1.594) | 2.05(1.98,2.13) | 630.503(332.877-927.812) | 539.639(309.180-807.315) | -0.144(-0.300-0.112) | -0.63(-0.76,-0.51) |
| Palau | 81.951(34.919-125.332) | 128.276(59.391-199.189) | 0.565(0.179-1.113) | 1.28(1.05,1.51) | 752.472(332.215-1139.127) | 547.980(265.382-839.128) | -0.272(-0.441--0.041) | -0.85(-0.93,-0.76) |
| Palestine | 9867.762(6003.210-13890.730) | 7587.825(5154.847-10171.242) | -0.231(-0.440-0.147) | -1.31(-1.90,-0.70) | 1176.314(740.235-1645.906) | 355.924(246.894-472.282) | -0.697(-0.774--0.549) | -4.10(-4.45,-3.74) |
| Panama | 3655.218(1744.601-5393.801) | 6439.607(3757.479-9174.683) | 0.762(0.399-1.390) | 1.54(1.35,1.74) | 237.815(116.639-350.002) | 144.192(84.216-206.096) | -0.394(-0.516--0.202) | -1.92(-2.12,-1.73) |
| Papua New Guinea | 12512.292(6488.421-18498.088) | 33574.462(17618.855-49363.717) | 1.683(0.824-2.954) | 3.43(3.33,3.53) | 629.727(336.934-923.770) | 570.234(302.833-830.302) | -0.094(-0.379-0.267) | -0.22(-0.29,-0.14) |
| Paraguay | 8054.570(4920.333-11010.477) | 15823.416(10519.879-21767.303) | 0.965(0.466-1.687) | 2.41(2.29,2.54) | 351.390(217.336-477.290) | 270.271(181.339-371.179) | -0.231(-0.426-0.041) | -0.62(-0.75,-0.49) |
| Peru | 29768.876(17557.127-41050.578) | 34486.587(21556.204-48244.001) | 0.158(-0.143-0.528) | 0.00(-0.44,0.44) | 240.907(149.654-328.780) | 99.916(62.754-140.042) | -0.585(-0.690--0.446) | -3.44(-3.86,-3.01) |
| Philippines | 206033.615(138660.138-271941.176) | 471517.424(339578.647-620989.892) | 1.289(0.896-1.837) | 2.85(2.77,2.94) | 656.436(455.065-868.887) | 551.057(401.196-713.329) | -0.161(-0.302-0.025) | -0.41(-0.50,-0.32) |
| Poland | 88530.469(50643.833-133240.813) | 48288.833(27834.151-73772.738) | -0.455(-0.595--0.296) | -2.26(-2.57,-1.95) | 208.290(118.776-313.540) | 65.793(38.374-100.536) | -0.684(-0.765--0.593) | -4.05(-4.29,-3.81) |
| Portugal | 10038.766(5487.466-15603.861) | 9197.077(5365.261-14339.998) | -0.084(-0.321-0.282) | 0.32(0.06,0.57) | 79.858(44.191-123.626) | 31.598(18.431-49.168) | -0.604(-0.700--0.476) | -2.54(-2.74,-2.34) |
| Puerto Rico | 16677.454(9732.831-22810.553) | 13191.880(9175.762-17366.459) | -0.209(-0.351-0.039) | -1.21(-1.47,-0.95) | 472.563(275.953-644.233) | 194.544(132.738-257.512) | -0.588(-0.662--0.470) | -3.28(-3.57,-2.98) |
| Qatar | 123.595(42.630-245.902) | 102.900(14.176-275.807) | -0.167(-0.817-1.050) | -1.67(-2.29,-1.06) | 116.387(46.961-218.197) | 11.718(2.334-27.640) | -0.899(-0.972--0.793) | -9.11(-9.74,-8.48) |
| Republic of Korea | 12850.223(6130.055-21931.538) | 33637.608(21098.478-52483.461) | 1.618(0.714-3.508) | 4.24(3.77,4.71) | 66.518(38.143-104.247) | 38.878(24.306-59.662) | -0.416(-0.578--0.089) | -0.78(-1.30,-0.27) |
| Republic of Moldova | 8065.281(4152.336-12562.731) | 17671.411(12009.720-24147.158) | 1.191(0.789-2.018) | 1.94(1.34,2.54) | 201.690(102.003-316.427) | 299.663(201.614-410.354) | 0.486(0.212-1.078) | 0.72(0.16,1.29) |
| Romania | 40272.024(22647.575-63925.352) | 5833.399(1014.729-13965.228) | -0.855(-0.960--0.722) | -8.15(-9.28,-7.01) | 161.345(92.622-252.137) | 14.175(2.627-33.687) | -0.912(-0.975--0.837) | -9.56(-10.45,-8.66) |
| Russian Federation | 391561.900(208556.368-590516.547) | 437724.900(243595.056-647073.900) | 0.118(0.000-0.261) | 0.53(0.11,0.96) | 226.769(119.313-341.395) | 190.308(107.200-279.991) | -0.161(-0.244--0.045) | -0.40(-0.85,0.05) |
| Rwanda | 58839.014(27797.216-83624.657) | 34845.528(18108.692-50074.262) | -0.408(-0.577--0.077) | -2.99(-3.66,-2.31) | 1966.515(1006.159-2742.845) | 579.609(314.108-829.413) | -0.705(-0.790--0.549) | -5.37(-5.92,-4.81) |
| Saint Kitts and Nevis | 238.263(147.499-322.775) | 230.827(167.973-304.087) | -0.031(-0.234-0.296) | 0.52(-0.23,1.27) | 671.019(407.583-909.334) | 358.574(268.525-467.979) | -0.466(-0.572--0.273) | -1.43(-2.01,-0.85) |
| Saint Lucia | 665.087(412.218-905.401) | 878.918(638.736-1175.691) | 0.322(0.064-0.817) | 1.15(0.58,1.72) | 797.306(500.128-1085.568) | 373.144(271.179-497.452) | -0.532(-0.624--0.369) | -2.43(-2.93,-1.93) |
| Saint Vincent and the Grenadines | 661.533(432.845-873.808) | 888.586(697.044-1107.448) | 0.343(0.071-0.772) | 0.92(0.27,1.58) | 946.859(617.608-1239.196) | 661.532(521.017-814.801) | -0.301(-0.442--0.094) | -1.30(-1.90,-0.70) |
| Samoa | 1391.694(614.387-2079.989) | 1912.433(931.448-2875.436) | 0.374(0.085-0.826) | 0.98(0.86,1.10) | 1552.573(723.347-2280.606) | 1250.288(619.772-1863.933) | -0.195(-0.364-0.052) | -0.78(-0.92,-0.64) |
| San Marino | 26.512(16.822-38.197) | 29.905(17.837-45.853) | 0.128(-0.217-0.602) | 1.26(0.80,1.72) | 74.591(47.080-108.262) | 33.514(19.662-52.146) | -0.551(-0.688--0.360) | -1.78(-2.27,-1.28) |
| Sao Tome and Principe | 379.636(177.002-549.319) | 538.024(263.676-824.320) | 0.417(0.138-0.858) | 0.93(0.79,1.08) | 580.388(275.789-836.399) | 434.862(224.254-650.823) | -0.251(-0.386--0.042) | -1.12(-1.25,-0.98) |
| Saudi Arabia | 33959.701(19979.678-50588.385) | 116288.494(67661.055-176341.580) | 2.424(1.352-4.030) | 4.25(4.09,4.42) | 569.279(349.966-841.357) | 467.083(285.563-679.975) | -0.180(-0.396-0.165) | -0.50(-0.74,-0.25) |
| Senegal | 20198.239(11704.855-29020.875) | 34755.905(22772.195-49686.423) | 0.721(0.271-1.489) | 2.12(1.66,2.58) | 587.655(345.537-835.501) | 423.346(279.175-599.843) | -0.280(-0.464-0.028) | -0.83(-1.26,-0.39) |
| Serbia | 31146.388(20359.515-44526.652) | 30486.257(19219.341-44054.288) | -0.021(-0.196-0.204) | -0.66(-0.95,-0.36) | 325.662(215.734-464.925) | 185.323(117.406-265.417) | -0.431(-0.536--0.306) | -2.56(-2.89,-2.24) |
| Seychelles | 634.067(462.548-810.192) | 678.474(498.445-872.431) | 0.070(-0.089-0.264) | 0.34(0.23,0.46) | 1123.794(818.856-1432.741) | 593.907(440.038-756.867) | -0.472(-0.550--0.367) | -1.97(-2.08,-1.85) |
| Sierra Leone | 11739.776(6252.054-17279.142) | 20863.514(11124.425-30450.230) | 0.777(0.343-1.446) | 2.06(1.87,2.25) | 544.182(292.406-807.128) | 491.194(269.460-716.975) | -0.097(-0.306-0.226) | -0.18(-0.52,0.16) |
| Singapore | 5015.012(3398.494-6749.493) | 5408.598(3606.129-7410.168) | 0.078(-0.153-0.327) | 0.63(0.38,0.88) | 221.407(150.545-300.530) | 63.608(42.730-86.988) | -0.713(-0.772--0.649) | -3.63(-3.84,-3.43) |
| Slovakia | 18552.551(10644.090-26950.309) | 13565.382(7952.893-19445.838) | -0.269(-0.384--0.124) | -0.96(-1.10,-0.81) | 316.671(181.770-459.884) | 146.271(86.065-207.993) | -0.538(-0.608--0.448) | -2.43(-2.60,-2.27) |
| Slovenia | 4901.310(3310.858-6686.862) | 4778.253(3273.612-6429.560) | -0.025(-0.216-0.271) | -0.02(-0.21,0.17) | 201.156(136.245-275.840) | 95.327(65.780-128.042) | -0.526(-0.613--0.404) | -2.41(-2.53,-2.30) |
| Solomon Islands | 3031.305(1118.037-4739.771) | 7366.326(2960.111-11553.846) | 1.430(0.778-2.665) | 2.91(2.80,3.01) | 1957.047(778.085-3015.351) | 1781.064(737.404-2781.640) | -0.090(-0.318-0.294) | -0.26(-0.37,-0.16) |
| Somalia | 45584.633(21632.104-68396.542) | 77879.764(38702.773-121577.659) | 0.708(0.248-1.311) | 1.69(1.58,1.80) | 1693.241(906.806-2466.217) | 1143.460(594.686-1694.862) | -0.325(-0.495--0.103) | -1.33(-1.42,-1.24) |
| South Africa | 99819.621(72291.255-126840.309) | 201282.972(150440.758-257913.267) | 1.016(0.757-1.301) | 2.12(1.67,2.57) | 441.854(320.291-570.240) | 435.209(324.335-562.583) | -0.015(-0.140-0.123) | -0.15(-0.57,0.26) |
| South Sudan | 23694.998(13393.523-35149.327) | 25140.976(14283.427-39273.075) | 0.061(-0.245-0.514) | -0.05(-0.51,0.40) | 931.645(553.581-1362.933) | 620.624(365.142-943.293) | -0.334(-0.509--0.050) | -1.62(-1.97,-1.27) |
| Spain | 19334.394(9329.349-32770.865) | 49047.372(32525.261-69107.898) | 1.537(0.832-3.006) | 3.54(3.22,3.86) | 38.021(18.690-64.322) | 42.333(28.355-60.305) | 0.113(-0.161-0.666) | 0.75(0.47,1.04) |
| Sri Lanka | 74177.527(46222.433-99884.370) | 65335.403(37901.606-97559.937) | -0.119(-0.435-0.304) | -0.77(-1.00,-0.54) | 667.991(420.056-899.189) | 249.742(146.438-374.735) | -0.626(-0.757--0.447) | -3.40(-3.60,-3.21) |
| Sudan | 84206.581(53170.469-116422.869) | 110742.140(68026.574-163845.683) | 0.315(-0.079-0.836) | 0.61(0.46,0.77) | 878.639(561.447-1205.819) | 524.373(323.527-776.810) | -0.403(-0.566--0.177) | -1.84(-1.94,-1.73) |
| Suriname | 1508.721(1014.180-1958.471) | 2496.742(1709.475-3446.541) | 0.655(0.273-1.158) | 1.99(1.74,2.23) | 579.258(393.857-752.592) | 393.032(271.004-542.640) | -0.321(-0.476--0.123) | -1.08(-1.30,-0.87) |
| Sweden | 23575.654(12123.874-35175.332) | 15553.030(10466.441-21201.943) | -0.340(-0.465--0.017) | -0.95(-1.15,-0.76) | 160.104(84.054-238.661) | 64.338(42.821-88.755) | -0.598(-0.667--0.421) | -2.56(-2.73,-2.40) |
| Switzerland | 15956.521(10184.670-22261.437) | 15911.865(10916.704-21088.627) | -0.003(-0.217-0.333) | 0.23(0.11,0.36) | 152.652(97.067-212.353) | 71.442(50.230-94.328) | -0.532(-0.619--0.402) | -2.22(-2.36,-2.07) |
| Syrian Arab Republic | 24333.473(14763.151-35663.870) | 58296.648(35255.190-87080.069) | 1.396(0.694-2.554) | 2.38(2.17,2.59) | 458.977(284.336-661.510) | 476.786(295.799-697.358) | 0.039(-0.254-0.519) | -0.56(-0.84,-0.28) |
| Taiwan (Province of China) | 29517.186(22559.672-36929.692) | 30088.530(19742.448-42059.910) | 0.019(-0.210-0.259) | 1.00(0.27,1.73) | 206.170(157.568-257.624) | 70.987(46.372-99.143) | -0.656(-0.733--0.580) | -2.57(-3.27,-1.85) |
| Tajikistan | 8268.055(4913.556-12051.148) | 8256.143(4207.205-13896.413) | -0.001(-0.336-0.389) | -1.63(-2.46,-0.78) | 312.742(184.699-465.949) | 166.193(87.342-269.460) | -0.469(-0.635--0.259) | -3.53(-4.51,-2.54) |
| Thailand | 110743.998(44110.071-168204.238) | 130473.081(70171.935-190501.772) | 0.178(-0.103-0.847) | -0.04(-0.26,0.18) | 289.330(121.868-444.241) | 127.609(68.172-187.366) | -0.559(-0.660--0.348) | -3.16(-3.38,-2.93) |
| Timor-Leste | 3289.821(1475.591-4959.905) | 6969.359(3396.328-10665.239) | 1.118(0.563-2.113) | 2.60(2.42,2.77) | 1015.129(508.147-1497.222) | 806.329(401.539-1218.491) | -0.206(-0.411-0.126) | -0.77(-0.94,-0.60) |
| Togo | 11145.679(5566.277-16349.640) | 36996.673(18307.621-56190.513) | 2.319(1.408-3.546) | 4.06(3.81,4.30) | 798.436(415.736-1144.645) | 846.012(439.493-1279.415) | 0.060(-0.209-0.425) | 0.25(0.01,0.48) |
| Tokelau | 16.351(8.255-24.046) | 10.031(5.352-14.708) | -0.386(-0.527--0.205) | -1.83(-1.95,-1.71) | 1265.903(651.325-1850.084) | 695.572(371.928-1017.172) | -0.451(-0.581--0.288) | -2.06(-2.11,-2.02) |
| Tonga | 303.510(140.095-454.967) | 328.798(150.909-495.549) | 0.083(-0.196-0.458) | 0.33(0.23,0.43) | 523.767(243.244-786.598) | 399.049(184.804-601.344) | -0.238(-0.429-0.010) | -0.79(-0.88,-0.71) |
| Trinidad and Tobago | 6227.651(4150.885-8149.984) | 6308.847(4045.631-8809.691) | 0.013(-0.222-0.285) | -0.74(-1.09,-0.39) | 759.919(509.532-988.829) | 338.931(218.734-470.151) | -0.554(-0.659--0.438) | -3.32(-3.67,-2.96) |
| Tunisia | 18965.243(13037.826-26755.448) | 19087.100(8655.238-33958.599) | 0.006(-0.439-0.732) | -0.74(-1.01,-0.46) | 418.480(287.366-588.593) | 160.123(75.688-278.726) | -0.617(-0.781--0.341) | -3.70(-3.93,-3.48) |
| Turkmenistan | 5441.156(3101.634-8206.147) | 1543.283(429.180-3407.460) | -0.716(-0.895--0.499) | -6.53(-8.01,-5.03) | 287.198(162.745-433.820) | 44.014(13.171-91.840) | -0.847(-0.939--0.741) | -8.33(-9.72,-6.92) |
| Tuvalu | 129.717(60.773-186.987) | 121.782(61.608-175.366) | -0.061(-0.244-0.179) | -0.09(-0.23,0.05) | 1846.797(899.278-2610.830) | 1139.075(588.563-1642.971) | -0.383(-0.501--0.227) | -1.42(-1.52,-1.31) |
| T眉rkiye | 8920.837(2060.009-21475.943) | 4047.093(312.718-12781.695) | -0.546(-0.929-0.361) | -0.56(-1.58,0.47) | 31.263(7.504-73.945) | 5.386(0.382-17.544) | -0.828(-0.976--0.457) | -4.09(-4.90,-3.28) |
| Uganda | 54345.999(24109.836-86659.060) | 82217.336(39526.858-123403.480) | 0.513(0.097-1.118) | 0.56(0.25,0.86) | 814.394(382.221-1279.959) | 525.732(266.241-787.855) | -0.354(-0.525--0.099) | -2.11(-2.38,-1.85) |
| Ukraine | 130720.545(69414.577-203267.867) | 98135.242(42403.098-172384.033) | -0.249(-0.503--0.003) | -2.75(-3.54,-1.96) | 190.148(100.907-294.107) | 129.091(55.915-226.141) | -0.321(-0.544--0.093) | -3.07(-3.91,-2.23) |
| United Arab Emirates | 99.892(19.493-262.602) | 8597.291(5405.003-12450.601) | 85.066(39.116-362.972) | 16.92(14.93,18.95) | 33.598(10.634-72.974) | 236.021(154.508-334.471) | 6.025(2.758-18.532) | 9.00(7.17,10.85) |
| United Kingdom | 158670.546(85300.986-232073.371) | 76231.019(49301.911-105969.689) | -0.520(-0.573--0.394) | -2.36(-2.64,-2.08) | 185.378(100.794-269.637) | 61.920(39.783-85.762) | -0.666(-0.703--0.581) | -3.54(-3.77,-3.31) |
| United Republic of Tanzania | 84729.147(51052.026-116488.153) | 125347.698(72076.640-178514.435) | 0.479(0.098-1.024) | 0.71(0.49,0.93) | 796.935(484.517-1076.215) | 500.280(293.390-726.357) | -0.372(-0.530--0.143) | -1.98(-2.17,-1.78) |
| United States of America | 475270.061(292488.243-684105.307) | 802649.896(587133.433-1044005.842) | 0.689(0.436-1.208) | 2.28(2.14,2.42) | 155.845(97.022-222.557) | 154.175(115.289-198.757) | -0.011(-0.159-0.292) | 0.52(0.38,0.65) |
| United States Virgin Islands | 406.191(286.181-532.655) | 349.204(235.581-467.548) | -0.140(-0.365-0.157) | -0.23(-0.43,-0.04) | 483.803(345.400-634.231) | 221.275(150.715-296.605) | -0.543(-0.654--0.395) | -2.24(-2.43,-2.05) |
| Uruguay | 12140.752(6684.443-17349.583) | 8874.307(6335.387-11289.664) | -0.269(-0.412-0.028) | -1.00(-1.30,-0.70) | 324.008(176.636-464.781) | 156.528(110.153-199.783) | -0.517(-0.605--0.326) | -2.31(-2.59,-2.03) |
| Uzbekistan | 17895.229(8863.833-29132.681) | 2547.445(494.829-6207.324) | -0.858(-0.957--0.717) | -9.81(-11.52,-8.08) | 155.093(77.324-253.498) | 15.559(3.148-36.191) | -0.900(-0.969--0.811) | -10.17(-11.62,-8.69) |
| Vanuatu | 760.518(308.847-1198.794) | 1939.275(893.347-2897.166) | 1.550(0.877-2.396) | 2.95(2.88,3.03) | 1013.845(434.549-1565.607) | 937.573(441.505-1395.372) | -0.075(-0.296-0.191) | -0.34(-0.41,-0.28) |
| Venezuela (Bolivarian Republic of) | 50213.056(32497.933-67124.761) | 84451.945(52363.600-119222.044) | 0.682(0.279-1.154) | 1.41(1.00,1.82) | 489.399(324.189-653.593) | 283.163(175.360-396.927) | -0.421(-0.561--0.270) | -2.20(-2.65,-1.75) |
| Viet Nam | 226459.093(115102.869-327233.151) | 171214.071(108070.412-250071.580) | -0.244(-0.482-0.172) | -0.93(-1.71,-0.15) | 563.526(292.588-814.871) | 178.953(115.128-259.971) | -0.682(-0.781--0.520) | -3.74(-4.44,-3.03) |
| Yemen | 65510.953(37896.789-94637.440) | 150073.310(82163.896-224215.854) | 1.291(0.629-2.387) | 2.45(2.26,2.64) | 1327.545(801.848-1878.778) | 1036.570(588.476-1537.805) | -0.219(-0.433-0.162) | -1.10(-1.26,-0.94) |
| Zambia | 35851.505(22481.526-48581.964) | 72955.802(40613.271-108022.212) | 1.035(0.421-1.737) | 1.95(1.79,2.12) | 1279.235(854.785-1730.146) | 1044.087(629.652-1485.471) | -0.184(-0.412-0.087) | -1.05(-1.28,-0.83) |
| Zimbabwe | 29184.671(16601.929-41467.817) | 79303.711(41369.451-118581.172) | 1.717(0.950-2.541) | 3.65(3.09,4.21) | 727.175(432.550-1025.438) | 1052.078(572.316-1567.994) | 0.447(0.086-0.853) | 1.83(1.24,2.41) |

Table 6：Cardiovascular disease mortality attributable to inadequate vegetable intake by region from1990 to 2021

|  | Number | | PC | EAPC | Rate | | PC | EAPC |
| --- | --- | --- | --- | --- | --- | --- | --- | --- |
| location | 1990 | 2021 | 1990-2021 | 1990-2021 | 1990 | 2021 | 1990-2021 | 1990-2021 |
| Global | 557760.841(367140.815-742379.086) | 682398.934(465824.237-900294.889) | 0.223(0.112-0.368) | 0.63(0.44,0.83) | 15.559(10.284-20.732) | 8.215(5.615-10.840) | -0.472(-0.515--0.414) | -2.09(-2.23,-1.96) |
| High SDI | 79300.222(47223.924-115630.869) | 94112.622(66924.540-124518.302) | 0.187(0.011-0.515) | 0.86(0.67,1.06) | 7.279(4.337-10.603) | 3.999(2.828-5.280) | -0.451(-0.523--0.314) | -1.66(-1.81,-1.51) |
| High-middle SDI | 91217.853(60656.855-124235.710) | 78002.510(50402.032-112621.820) | -0.145(-0.258--0.017) | -0.58(-0.71,-0.45) | 10.669(7.090-14.624) | 4.150(2.688-5.958) | -0.611(-0.661--0.555) | -3.06(-3.12,-2.99) |
| Middle SDI | 185946.732(128381.467-238587.549) | 188788.149(127494.684-254728.305) | 0.015(-0.138-0.201) | -0.09(-0.42,0.23) | 22.493(16.224-28.713) | 7.938(5.416-10.788) | -0.647(-0.701--0.579) | -3.48(-3.71,-3.25) |
| Low-middle SDI | 127290.770(76219.839-174490.970) | 201905.970(132037.992-269254.390) | 0.586(0.393-0.892) | 1.51(1.39,1.63) | 23.827(15.263-32.410) | 15.925(10.634-21.220) | -0.332(-0.411--0.205) | -1.32(-1.42,-1.23) |
| Low SDI | 73340.096(44947.778-98675.280) | 118766.603(74849.102-158541.195) | 0.619(0.436-0.887) | 1.44(1.30,1.58) | 8.826(4.500-13.206) | 3.811(2.522-5.155) | -0.568(-0.644--0.379) | -2.52(-2.74,-2.31) |
| African Union | 82461.253(54600.373-108640.172) | 123642.483(81452.295-163572.821) | 0.499(0.315-0.726) | 1.10(0.96,1.24) | 34.503(23.894-45.355) | 23.099(15.990-30.490) | -0.331(-0.415--0.221) | -1.46(-1.55,-1.37) |
| Association of Southeast Asian Nations | 62398.871(33310.138-88167.771) | 85262.352(55400.350-113287.772) | 0.366(0.126-0.790) | 0.92(0.73,1.11) | 15.558(10.284-20.730) | 8.213(5.613-10.837) | -0.472(-0.516--0.415) | -2.09(-2.23,-1.96) |
| Central Europe, Eastern Europe, and Central Asia | 46376.919(25437.076-70384.927) | 45517.608(26665.944-67729.433) | -0.019(-0.109-0.123) | -0.42(-0.66,-0.18) | 10.845(5.922-16.397) | 6.942(4.075-10.326) | -0.360(-0.422--0.265) | -1.83(-2.16,-1.51) |
| Commonwealth | 148435.179(89758.199-206206.422) | 257146.604(167635.010-343606.710) | 0.732(0.511-1.078) | 1.81(1.72,1.91) | 6.846(4.126-9.924) | 4.127(2.904-5.448) | -0.397(-0.475--0.257) | -1.35(-1.49,-1.20) |
| European Union | 44919.305(27278.077-65495.524) | 54151.578(37225.669-72042.114) | 0.206(-0.015-0.554) | 0.93(0.79,1.07) | 7.627(4.634-11.090) | 4.383(3.042-5.848) | -0.425(-0.517--0.277) | -1.53(-1.61,-1.45) |
| Four World Regions | 556313.296(366245.957-740454.394) | 680756.495(464622.007-898283.515) | 0.224(0.111-0.368) | 0.63(0.44,0.83) | 15.551(10.282-20.721) | 8.212(5.611-10.836) | -0.472(-0.516--0.415) | -2.09(-2.22,-1.96) |
| G20 | 348052.730(236449.554-456572.669) | 387804.640(268544.171-520744.648) | 0.114(-0.010-0.267) | 0.48(0.22,0.74) | 12.678(8.760-16.729) | 6.094(4.233-8.180) | -0.519(-0.570--0.457) | -2.25(-2.45,-2.05) |
| Gulf Cooperation Council | 1611.522(1030.579-2343.102) | 4062.890(2524.794-5915.248) | 1.521(0.865-2.481) | 3.15(3.07,3.24) | 26.632(17.293-38.698) | 16.503(10.514-23.676) | -0.380(-0.535--0.160) | -1.46(-1.63,-1.30) |
| Health System Grouping Levels | 557095.673(366727.649-741475.459) | 681575.854(465252.835-899239.641) | 0.223(0.111-0.368) | 0.63(0.44,0.83) | 27.505(15.402-38.806) | 14.841(9.811-19.648) | -0.460(-0.553--0.318) | -2.05(-2.18,-1.92) |
| High-income | 77878.630(47151.013-113098.423) | 104375.844(73967.940-136815.229) | 0.340(0.121-0.702) | 1.36(1.19,1.54) | 6.578(3.987-9.540) | 4.044(2.908-5.297) | -0.385(-0.476--0.225) | -1.19(-1.34,-1.04) |
| Latin America and Caribbean | 37310.975(24875.042-49006.668) | 54510.501(37429.909-71510.633) | 0.461(0.324-0.631) | 1.31(1.12,1.49) | 18.930(13.001-24.825) | 9.057(6.198-11.869) | -0.522(-0.563--0.478) | -2.36(-2.54,-2.17) |
| League of Arab States | 22802.034(15039.188-31045.078) | 34405.100(21924.007-47306.006) | 0.509(0.256-0.797) | 1.17(0.93,1.42) | 27.433(18.444-37.084) | 16.032(10.434-22.245) | -0.416(-0.515--0.306) | -1.86(-2.04,-1.67) |
| Nordic Region | 3438.548(1729.352-5167.173) | 2692.263(1803.128-3626.930) | -0.217(-0.363-0.164) | -0.61(-0.88,-0.35) | 37.825(24.971-50.129) | 27.709(18.367-36.496) | -0.267(-0.355--0.150) | -1.12(-1.23,-1.00) |
| North Africa and Middle East | 32716.691(21513.220-44820.924) | 43401.004(28195.282-59670.158) | 0.327(0.126-0.563) | 0.75(0.54,0.97) | 23.880(16.094-32.815) | 11.489(7.585-16.027) | -0.519(-0.592--0.432) | -2.55(-2.74,-2.36) |
| OECD Countries | 89917.682(54173.312-130618.087) | 120359.674(84945.986-159036.247) | 0.339(0.134-0.668) | 1.29(1.10,1.48) | 18.984(11.914-26.132) | 13.629(9.020-18.147) | -0.282(-0.372--0.143) | -1.09(-1.17,-1.00) |
| Organization of Islamic Cooperation | 124727.112(73840.998-172380.230) | 179196.159(113034.957-243345.198) | 0.437(0.262-0.671) | 0.99(0.87,1.11) | 27.161(16.791-37.506) | 16.573(10.810-22.422) | -0.390(-0.468--0.287) | -1.80(-1.90,-1.69) |
| Sahel Region | 19068.304(12425.838-25551.732) | 27678.092(17358.820-37599.244) | 0.452(0.170-0.735) | 1.03(0.85,1.20) | 34.027(22.538-45.565) | 22.783(14.840-30.749) | -0.330(-0.460--0.204) | -1.48(-1.59,-1.37) |
| South Asia | 102136.546(60671.574-143164.120) | 198595.277(125107.410-267168.597) | 0.944(0.660-1.409) | 2.29(2.18,2.39) | 20.227(12.745-28.036) | 15.213(9.980-20.560) | -0.248(-0.362--0.058) | -0.86(-0.97,-0.75) |
| Southeast Asia, East Asia, and Oceania | 193092.891(133706.678-250558.163) | 128480.955(81902.384-180458.401) | -0.335(-0.467--0.173) | -1.61(-2.04,-1.17) | 22.222(15.698-28.568) | 5.166(3.277-7.342) | -0.768(-0.819--0.703) | -4.90(-5.19,-4.60) |
| Sub-Saharan Africa | 68248.189(44457.676-89895.433) | 107517.745(69283.068-142804.253) | 0.575(0.372-0.820) | 1.24(1.11,1.36) | 37.144(25.561-48.536) | 26.914(18.264-35.397) | -0.275(-0.370--0.161) | -1.25(-1.35,-1.15) |
| WHO region | 555016.914(365270.539-738851.125) | 678921.780(463186.028-896098.205) | 0.223(0.111-0.367) | 0.63(0.44,0.82) | 15.570(10.291-20.751) | 8.232(5.625-10.864) | -0.471(-0.515--0.414) | -2.09(-2.22,-1.95) |
| World Bank Regions | 556988.839(366668.662-741308.295) | 681467.421(465200.039-899097.020) | 0.223(0.111-0.368) | 0.63(0.44,0.83) | 15.562(10.287-20.736) | 8.214(5.614-10.838) | -0.472(-0.516--0.415) | -2.09(-2.23,-1.96) |

Table 7：Cardiovascular disease DALY attributable to inadequate vegetable intake by region from1990 to 2021

|  | Number | | PC | EAPCs | Rate | | PC | EAPCs |
| --- | --- | --- | --- | --- | --- | --- | --- | --- |
| location | 1990 | 2021 | 1990-2021 | 1990-2021 | 1990 | 2021 | 1990-2021 | 1990-2021 |
| Global | 14114700.979(9024860.182-18941602.525) | 16001496.536(10422322.434-21138422.413) | 0.134(0.041-0.255) | 0.34(0.16,0.53) | 353.290(228.593-473.073) | 187.472(122.493-247.598) | -0.469(-0.511--0.418) | -2.12(-2.28,-1.96) |
| High SDI | 1602732.740(971012.658-2295845.570) | 1695160.507(1197747.462-2247609.539) | 0.058(-0.071-0.316) | 0.56(0.36,0.75) | 148.482(90.096-212.265) | 86.430(61.891-113.909) | -0.418(-0.485--0.279) | -1.39(-1.58,-1.21) |
| High-middle SDI | 2076618.080(1364820.212-2827216.414) | 1392169.036(888266.238-2012151.122) | -0.330(-0.412--0.247) | -1.51(-1.64,-1.38) | 217.476(142.724-295.615) | 73.299(46.990-105.476) | -0.663(-0.703--0.622) | -3.66(-3.76,-3.57) |
| Middle SDI | 4759869.871(3186242.536-6194114.259) | 4454519.458(2952886.760-5927545.864) | -0.064(-0.184-0.100) | -0.37(-0.68,-0.06) | 468.487(324.050-602.364) | 169.161(112.897-225.986) | -0.639(-0.687--0.576) | -3.44(-3.71,-3.16) |
| Low-middle SDI | 3593289.996(2035669.558-4934850.790) | 5171329.329(3254156.543-6920685.100) | 0.439(0.280-0.707) | 1.17(1.06,1.28) | 559.070(332.437-765.451) | 353.404(226.297-470.829) | -0.368(-0.437--0.253) | -1.52(-1.60,-1.43) |
| Low SDI | 2065802.671(1192509.575-2789592.229) | 3269665.970(1970522.056-4407207.733) | 0.583(0.416-0.824) | 1.32(1.18,1.45) | 878.684(537.561-1179.611) | 613.842(384.856-820.919) | -0.301(-0.377--0.192) | -1.34(-1.44,-1.23) |
| African Union | 2242533.977(1414638.138-2978076.165) | 3312971.379(2068847.645-4427161.259) | 0.477(0.309-0.686) | 1.03(0.89,1.16) | 771.535(505.002-1014.229) | 491.235(322.370-649.602) | -0.363(-0.438--0.270) | -1.66(-1.75,-1.57) |
| Association of Southeast Asian Nations | 1852703.032(907464.830-2656355.732) | 2299789.059(1464248.938-3057077.438) | 0.241(0.027-0.652) | 0.63(0.44,0.82) | 690.452(358.433-982.571) | 350.791(227.107-464.511) | -0.492(-0.580--0.337) | -2.24(-2.40,-2.07) |
| Central Europe, Eastern Europe, and Central Asia | 1047279.166(589336.831-1568994.203) | 859237.401(509353.154-1275216.838) | -0.180(-0.254--0.087) | -1.16(-1.47,-0.85) | 229.332(128.472-342.960) | 134.833(80.227-199.061) | -0.412(-0.463--0.345) | -2.23(-2.58,-1.87) |
| Commonwealth | 4140851.187(2400775.130-5716806.335) | 6625453.542(4122902.846-8854650.233) | 0.600(0.396-0.909) | 1.53(1.45,1.60) | 456.032(271.775-632.669) | 314.106(198.199-419.452) | -0.311(-0.398--0.179) | -1.24(-1.31,-1.18) |
| European Union | 863861.567(521915.431-1253411.133) | 748826.614(523954.033-1005166.953) | -0.133(-0.264-0.079) | -0.27(-0.40,-0.14) | 149.041(90.237-215.362) | 70.390(47.996-95.006) | -0.528(-0.588--0.432) | -2.29(-2.36,-2.22) |
| Four World Regions | 14080308.510(9003128.874-18896061.547) | 15968087.979(10400138.623-21096189.839) | 0.134(0.041-0.256) | 0.35(0.16,0.53) | 353.149(228.516-472.841) | 187.398(122.444-247.523) | -0.469(-0.511--0.418) | -2.12(-2.28,-1.96) |
| G20 | 8514826.001(5664338.962-11271600.451) | 8548307.528(5773122.262-11456100.622) | 0.004(-0.091-0.137) | 0.11(-0.15,0.37) | 280.631(187.962-370.292) | 135.141(91.000-180.861) | -0.518(-0.562--0.461) | -2.27(-2.50,-2.05) |
| Gulf Cooperation Council | 40348.623(24670.505-59229.238) | 133254.521(79439.506-196117.032) | 2.303(1.383-3.666) | 4.24(4.09,4.39) | 504.516(321.450-735.006) | 341.323(217.921-487.123) | -0.323(-0.485--0.077) | -1.07(-1.29,-0.85) |
| Health System Grouping Levels | 14098313.358(9014690.170-18918979.485) | 15982844.301(10410318.004-21113759.666) | 0.134(0.041-0.255) | 0.34(0.16,0.53) | 353.270(228.589-473.015) | 187.416(122.459-247.524) | -0.469(-0.511--0.418) | -2.12(-2.28,-1.96) |
| High-income | 1528464.205(937836.374-2184226.657) | 1737088.869(1258224.352-2297311.742) | 0.136(-0.020-0.435) | 0.86(0.68,1.05) | 131.338(80.814-187.052) | 82.495(59.256-108.146) | -0.372(-0.453--0.212) | -1.07(-1.24,-0.90) |
| Latin America and Caribbean | 956272.218(605272.322-1276385.922) | 1217406.875(824961.928-1616412.417) | 0.273(0.149-0.440) | 0.77(0.55,0.98) | 417.795(270.859-554.374) | 195.622(132.591-259.775) | -0.532(-0.573--0.483) | -2.50(-2.72,-2.28) |
| League of Arab States | 575547.173(367699.667-787649.035) | 864073.393(535849.334-1184152.646) | 0.501(0.261-0.781) | 1.13(0.90,1.36) | 554.325(362.655-756.472) | 309.363(197.128-426.924) | -0.442(-0.533--0.338) | -2.05(-2.23,-1.88) |
| Nordic Region | 66456.686(35126.648-98406.553) | 38769.398(25510.999-53132.529) | -0.417(-0.514--0.174) | -1.59(-1.85,-1.32) | 184.949(98.800-273.108) | 63.702(41.768-87.323) | -0.656(-0.706--0.528) | -3.26(-3.46,-3.06) |
| North Africa and Middle East | 822090.734(524643.673-1115420.987) | 1069031.135(684456.305-1470182.984) | 0.300(0.109-0.523) | 0.61(0.38,0.83) | 492.458(322.379-673.042) | 230.779(149.856-316.425) | -0.531(-0.601--0.452) | -2.70(-2.89,-2.51) |
| OECD Countries | 1801848.255(1095394.201-2579617.548) | 2046520.916(1423989.558-2713718.092) | 0.136(-0.001-0.409) | 0.76(0.57,0.95) | 137.804(83.886-196.767) | 83.432(58.958-110.380) | -0.395(-0.462--0.258) | -1.31(-1.48,-1.14) |
| Organization of Islamic Cooperation | 3480121.270(1931666.206-4853294.203) | 4797391.585(2897238.342-6508947.934) | 0.379(0.218-0.595) | 0.86(0.75,0.97) | 637.678(367.394-877.510) | 361.842(225.885-488.496) | -0.433(-0.499--0.341) | -2.02(-2.12,-1.93) |
| Sahel Region | 525357.155(331069.338-705484.136) | 788694.526(488129.137-1068451.002) | 0.501(0.219-0.800) | 1.15(0.97,1.32) | 788.000(510.891-1056.943) | 511.145(321.753-691.807) | -0.351(-0.472--0.225) | -1.58(-1.69,-1.47) |
| South Asia | 2976316.452(1653027.973-4165709.143) | 5134319.959(3059858.060-6971118.440) | 0.725(0.479-1.115) | 1.86(1.78,1.94) | 482.615(283.586-674.318) | 341.426(209.103-461.023) | -0.293(-0.396--0.129) | -1.08(-1.15,-1.02) |
| Southeast Asia, East Asia, and Oceania | 4891496.580(3321836.909-6380084.669) | 3032524.059(1963926.455-4109388.922) | -0.380(-0.481--0.259) | -1.81(-2.25,-1.37) | 453.029(317.192-586.578) | 111.914(72.537-153.318) | -0.753(-0.797--0.706) | -4.73(-5.11,-4.34) |
| Sub-Saharan Africa | 1892781.624(1163442.702-2520732.352) | 2951888.238(1822600.107-3968602.049) | 0.560(0.375-0.807) | 1.19(1.07,1.31) | 856.801(551.732-1133.372) | 587.005(375.016-778.561) | -0.315(-0.398--0.211) | -1.45(-1.55,-1.35) |
| WHO region | 14050685.140(8978285.649-18859501.282) | 15937928.571(10373539.710-21058381.239) | 0.134(0.042-0.257) | 0.34(0.16,0.53) | 353.778(228.762-473.783) | 187.925(122.707-248.245) | -0.469(-0.511--0.417) | -2.12(-2.27,-1.96) |
| World Bank Regions | 14096370.359(9013401.416-18915971.795) | 15981095.454(10409406.705-21110996.856) | 0.134(0.041-0.255) | 0.34(0.16,0.53) | 353.386(228.663-473.165) | 187.462(122.491-247.580) | -0.470(-0.512--0.418) | -2.12(-2.28,-1.96) |

Table 8：Cardiovascular disease mortality attributable to inadequate vegetable intake among males by region from1990 to 2021

|  | Number | | PC | EAPC | Rate | | PC | EAPC |
| --- | --- | --- | --- | --- | --- | --- | --- | --- |
| location | 1990 | 2021 | 1990-2021 | 1990-2021 | 1990 | 2021 | 1990-2021 | 1990-2021 |
| Global | 283711.520(185912.625-384053.262) | 336844.631(215656.933-454207.125) | 0.187(0.073-0.340) | 0.50(0.33,0.68) | 17.794(11.958-23.910) | 9.076(5.893-12.298) | -0.490(-0.539--0.426) | -2.22(-2.35,-2.10) |
| High-middle SDI | 46454.662(30960.994-64353.813) | 36611.580(23118.411-53887.969) | -0.212(-0.332--0.062) | -0.91(-1.04,-0.78) | 13.413(9.016-18.605) | 4.846(3.080-7.128) | -0.639(-0.697--0.565) | -3.30(-3.37,-3.23) |
| Middle SDI | 96379.034(65487.632-126757.637) | 99813.527(66393.663-139461.460) | 0.036(-0.131-0.242) | -0.02(-0.32,0.27) | 24.315(17.276-31.556) | 9.208(6.073-13.071) | -0.621(-0.689--0.539) | -3.24(-3.45,-3.03) |
| Low-middle SDI | 65509.606(37874.155-90035.145) | 100550.659(60480.502-136201.942) | 0.535(0.334-0.833) | 1.36(1.28,1.44) | 23.541(14.438-32.420) | 16.404(10.116-22.464) | -0.303(-0.393--0.169) | -1.21(-1.27,-1.15) |
| Low SDI | 35179.529(20055.183-49564.137) | 53356.322(29567.450-74853.808) | 0.517(0.344-0.803) | 1.18(1.05,1.30) | 34.279(20.808-47.705) | 23.948(13.945-33.210) | -0.301(-0.382--0.154) | -1.30(-1.40,-1.19) |
| African Union | 37938.251(22750.188-51752.242) | 55569.582(34197.348-76828.085) | 0.465(0.284-0.654) | 0.97(0.83,1.12) | 31.096(19.933-42.365) | 20.537(13.217-27.998) | -0.340(-0.424--0.259) | -1.56(-1.66,-1.46) |
| Association of Southeast Asian Nations | 32085.854(16772.161-45552.567) | 46660.799(30417.824-63940.094) | 0.454(0.183-0.933) | 1.17(0.97,1.37) | 29.767(16.598-42.534) | 17.194(11.293-23.408) | -0.422(-0.526--0.263) | -1.78(-1.91,-1.65) |
| Central Europe, Eastern Europe, and Central Asia | 22572.543(12393.152-34026.600) | 21090.285(12442.234-31462.912) | -0.066(-0.160-0.052) | -0.59(-0.87,-0.31) | 14.631(7.976-22.194) | 8.899(5.315-13.268) | -0.392(-0.452--0.309) | -1.94(-2.26,-1.63) |
| Commonwealth | 76251.558(42868.993-106944.699) | 125502.570(72258.801-179660.758) | 0.646(0.416-0.989) | 1.59(1.54,1.63) | 19.221(11.318-26.895) | 13.711(7.985-19.569) | -0.287(-0.383--0.138) | -1.14(-1.20,-1.08) |
| European Union | 21374.832(12525.743-31399.017) | 21975.772(14959.134-29590.348) | 0.028(-0.119-0.298) | 0.31(0.13,0.50) | 9.526(5.622-14.012) | 4.986(3.378-6.736) | -0.477(-0.546--0.352) | -1.89(-1.98,-1.81) |
| Four World Regions | 282934.787(185392.030-383025.594) | 336013.344(215078.280-453147.090) | 0.188(0.074-0.341) | 0.51(0.33,0.68) | 17.783(11.951-23.892) | 9.070(5.887-12.292) | -0.490(-0.539--0.426) | -2.22(-2.34,-2.10) |
| G20 | 177477.878(119691.275-238884.819) | 192014.373(123158.870-261325.692) | 0.082(-0.059-0.260) | 0.35(0.10,0.59) | 14.878(10.127-20.015) | 6.923(4.487-9.458) | -0.535(-0.594--0.458) | -2.38(-2.56,-2.20) |
| Gulf Cooperation Council | 918.752(552.467-1365.601) | 2786.819(1637.187-4164.135) | 2.033(1.264-3.071) | 3.75(3.65,3.86) | 27.021(16.433-39.923) | 17.481(10.556-25.890) | -0.353(-0.530--0.131) | -1.42(-1.64,-1.20) |
| Health System Grouping Levels | 283371.061(185697.637-383586.125) | 336439.504(215396.974-453682.842) | 0.187(0.073-0.341) | 0.50(0.33,0.68) | 17.793(11.958-23.906) | 9.073(5.891-12.295) | -0.490(-0.539--0.426) | -2.22(-2.35,-2.10) |
| High SDI | 39848.229(23380.234-58324.686) | 46107.415(31822.301-62144.217) | 0.157(0.002-0.453) | 0.79(0.55,1.02) | 9.346(5.471-13.737) | 4.952(3.450-6.625) | -0.470(-0.535--0.333) | -1.80(-1.97,-1.63) |
| High-income | 38513.021(22612.587-55866.063) | 48644.887(34126.896-65128.605) | 0.263(0.092-0.612) | 1.15(0.94,1.37) | 8.362(4.945-12.201) | 4.925(3.461-6.562) | -0.411(-0.488--0.253) | -1.36(-1.52,-1.20) |
| Latin America and Caribbean | 19243.408(12325.298-25589.793) | 27751.680(18644.346-36798.489) | 0.442(0.298-0.615) | 1.35(1.16,1.54) | 20.070(13.358-26.573) | 10.376(7.016-13.741) | -0.483(-0.534--0.425) | -2.03(-2.21,-1.86) |
| League of Arab States | 11945.733(7875.638-16154.878) | 19239.551(11842.391-27365.707) | 0.611(0.342-0.877) | 1.36(1.12,1.61) | 27.589(18.564-37.360) | 16.675(10.370-23.834) | -0.396(-0.500--0.288) | -1.82(-2.01,-1.63) |
| Nordic Region | 1899.347(982.087-2851.451) | 1169.354(751.911-1640.890) | -0.384(-0.475--0.176) | -1.49(-1.75,-1.23) | 12.367(6.405-18.544) | 4.288(2.763-6.000) | -0.653(-0.703--0.539) | -3.30(-3.45,-3.14) |
| North Africa and Middle East | 18151.494(11940.635-24429.838) | 24399.112(15495.481-34417.216) | 0.344(0.142-0.575) | 0.77(0.54,0.99) | 26.220(17.812-35.378) | 12.650(8.180-17.805) | -0.518(-0.592--0.432) | -2.59(-2.75,-2.43) |
| OECD Countries | 44411.902(26013.221-64594.635) | 56140.008(38491.158-75834.698) | 0.264(0.107-0.583) | 1.09(0.87,1.31) | 8.578(5.027-12.543) | 4.959(3.429-6.677) | -0.422(-0.492--0.280) | -1.50(-1.66,-1.34) |
| Organization of Islamic Cooperation | 65728.162(39184.694-91057.643) | 95677.941(57922.310-131426.063) | 0.456(0.274-0.706) | 1.02(0.90,1.14) | 28.077(17.360-38.590) | 17.486(11.064-23.992) | -0.377(-0.455--0.270) | -1.75(-1.86,-1.63) |
| Sahel Region | 8542.920(5231.953-11999.260) | 13359.101(8146.014-18763.631) | 0.564(0.270-0.894) | 1.28(1.15,1.41) | 29.348(18.776-41.160) | 21.126(13.423-29.725) | -0.280(-0.416--0.129) | -1.24(-1.34,-1.14) |
| South Asia | 54154.502(29642.548-77862.838) | 98208.946(53363.931-144366.542) | 0.813(0.505-1.286) | 1.98(1.94,2.02) | 19.653(11.078-28.255) | 15.184(8.333-22.524) | -0.227(-0.364--0.025) | -0.82(-0.88,-0.76) |
| Southeast Asia, East Asia, and Oceania | 100713.120(70089.186-134474.795) | 70377.054(44029.329-102926.559) | -0.301(-0.455--0.102) | -1.44(-1.87,-1.01) | 25.607(18.570-33.688) | 6.413(3.962-9.773) | -0.750(-0.817--0.661) | -4.63(-4.90,-4.37) |
| Sub-Saharan Africa | 30363.432(17680.961-42371.845) | 46372.666(27732.122-64062.976) | 0.527(0.351-0.754) | 1.08(0.95,1.22) | 32.287(19.832-44.998) | 23.198(14.666-31.853) | -0.282(-0.361--0.179) | -1.32(-1.44,-1.20) |
| WHO region | 282183.201(184813.441-382079.976) | 335028.468(214307.768-451895.866) | 0.187(0.073-0.341) | 0.50(0.33,0.68) | 17.810(11.962-23.933) | 9.090(5.899-12.322) | -0.490(-0.538--0.425) | -2.22(-2.34,-2.10) |
| World Bank Regions | 283316.572(185668.305-383504.210) | 336387.599(215367.991-453613.595) | 0.187(0.073-0.341) | 0.50(0.33,0.68) | 17.798(11.961-23.912) | 9.075(5.892-12.297) | -0.490(-0.539--0.426) | -2.22(-2.35,-2.10) |

Table 9：Cardiovascular disease mortality attributable to inadequate vegetable intake among females by region from1990 to 2021

|  | Number | | PC | EAPC | Rate | | PC | EAPC |
| --- | --- | --- | --- | --- | --- | --- | --- | --- |
| location | 1990 | 2021 | 1990-2021 | 1990-2021 | 1990 | 2021 | 1990-2021 | 1990-2021 |
| Global | 274049.321(183919.940-364364.937) | 345554.303(241358.991-453060.218) | 0.261(0.120-0.443) | 0.76(0.55,0.97) | 13.743(9.184-18.260) | 7.431(5.168-9.740) | -0.459(-0.517--0.385) | -1.99(-2.14,-1.84) |
| High SDI | 39451.993(23791.044-56879.328) | 48005.206(32161.126-64034.073) | 0.217(-0.009-0.573) | 0.94(0.79,1.10) | 5.672(3.436-8.170) | 3.107(2.164-4.096) | -0.452(-0.538--0.306) | -1.66(-1.80,-1.53) |
| High-middle SDI | 44763.191(29455.749-61965.023) | 41390.930(26797.635-59962.746) | -0.075(-0.232-0.103) | -0.26(-0.40,-0.12) | 8.771(5.765-12.269) | 3.558(2.305-5.152) | -0.594(-0.662--0.519) | -2.90(-2.96,-2.83) |
| Middle SDI | 89567.698(60802.551-116401.545) | 88974.623(60770.087-120939.654) | -0.007(-0.182-0.250) | -0.17(-0.54,0.20) | 20.775(14.234-26.758) | 6.872(4.712-9.351) | -0.669(-0.729--0.581) | -3.69(-3.95,-3.44) |
| Low-middle SDI | 61781.164(37836.756-84553.948) | 101355.311(68420.431-133829.655) | 0.641(0.395-1.035) | 1.66(1.50,1.82) | 23.982(15.188-32.376) | 15.375(10.634-20.343) | -0.359(-0.455--0.220) | -1.43(-1.57,-1.30) |
| Low SDI | 38160.567(23620.170-50845.895) | 65410.281(44044.702-85938.734) | 0.714(0.470-1.054) | 1.67(1.52,1.82) | 40.945(26.943-54.205) | 30.799(21.698-39.858) | -0.248(-0.360--0.095) | -1.01(-1.14,-0.88) |
| African Union | 44523.002(30109.646-58514.801) | 68072.901(46909.764-88788.364) | 0.529(0.291-0.841) | 1.21(1.08,1.34) | 37.291(25.805-48.541) | 25.135(17.748-33.000) | -0.326(-0.435--0.183) | -1.39(-1.47,-1.31) |
| Association of Southeast Asian Nations | 30313.017(16277.788-42960.290) | 38601.553(24349.134-52607.661) | 0.273(0.030-0.733) | 0.64(0.46,0.81) | 25.353(14.288-35.978) | 12.667(8.046-17.116) | -0.500(-0.595--0.336) | -2.34(-2.47,-2.21) |
| Central Europe, Eastern Europe, and Central Asia | 23804.376(13038.897-36563.976) | 24427.323(14112.884-36941.238) | 0.026(-0.094-0.190) | -0.26(-0.47,-0.06) | 8.461(4.620-12.916) | 5.523(3.189-8.323) | -0.347(-0.424--0.241) | -1.80(-2.12,-1.48) |
| Commonwealth | 72183.621(45515.829-99198.182) | 131644.034(90557.415-174290.629) | 0.824(0.536-1.279) | 2.04(1.88,2.21) | 18.540(11.890-25.281) | 13.415(9.409-17.700) | -0.276(-0.391--0.108) | -1.02(-1.16,-0.88) |
| European Union | 23544.473(14786.818-33912.857) | 32175.806(21702.643-43920.619) | 0.367(0.071-0.785) | 1.42(1.29,1.54) | 6.122(3.859-8.795) | 3.800(2.552-5.144) | -0.379(-0.501--0.206) | -1.22(-1.32,-1.13) |
| Four World Regions | 273378.509(183482.955-363488.757) | 344743.150(240824.015-451986.674) | 0.261(0.120-0.443) | 0.76(0.55,0.97) | 13.739(9.182-18.255) | 7.430(5.168-9.738) | -0.459(-0.517--0.385) | -1.99(-2.14,-1.84) |
| G20 | 170574.852(116613.904-226374.194) | 195790.267(137715.724-262493.003) | 0.148(-0.008-0.363) | 0.62(0.33,0.90) | 10.964(7.416-14.589) | 5.354(3.740-7.162) | -0.512(-0.574--0.428) | -2.17(-2.39,-1.95) |
| Gulf Cooperation Council | 692.770(407.741-1041.303) | 1276.071(796.295-1872.061) | 0.842(0.242-1.833) | 2.12(2.04,2.19) | 26.070(15.408-39.173) | 15.036(9.530-22.232) | -0.423(-0.612--0.067) | -1.59(-1.70,-1.48) |
| Health System Grouping Levels | 273724.612(183710.801-363933.581) | 345136.350(241094.028-452518.485) | 0.261(0.120-0.443) | 0.76(0.55,0.97) | 13.743(9.184-18.259) | 7.429(5.167-9.738) | -0.459(-0.517--0.385) | -1.99(-2.14,-1.84) |
| High-income | 39365.609(24026.798-56923.718) | 55730.957(37871.010-74319.104) | 0.416(0.124-0.836) | 1.56(1.40,1.71) | 5.177(3.168-7.471) | 3.225(2.248-4.205) | -0.377(-0.487--0.207) | -1.14(-1.28,-0.99) |
| Latin America and Caribbean | 18067.567(12189.115-23603.962) | 26758.820(18585.007-34824.140) | 0.481(0.323-0.649) | 1.26(1.09,1.44) | 17.772(12.210-23.166) | 7.915(5.498-10.287) | -0.555(-0.598--0.511) | -2.66(-2.85,-2.47) |
| League of Arab States | 10856.301(7038.334-15156.865) | 15165.549(9313.730-21421.405) | 0.397(0.118-0.756) | 0.95(0.71,1.19) | 27.226(17.935-37.992) | 15.324(9.683-21.768) | -0.437(-0.555--0.285) | -1.91(-2.09,-1.73) |
| Nordic Region | 1539.201(777.671-2317.381) | 1522.909(1035.581-2026.621) | -0.011(-0.244-0.562) | 0.23(-0.03,0.49) | 6.041(3.089-9.041) | 3.261(2.201-4.333) | -0.460(-0.580--0.174) | -1.75(-2.00,-1.50) |
| North Africa and Middle East | 14565.197(9400.683-20349.724) | 19001.892(12050.100-26963.107) | 0.305(0.051-0.604) | 0.74(0.52,0.95) | 21.568(13.914-30.136) | 10.312(6.575-14.784) | -0.522(-0.617--0.413) | -2.52(-2.73,-2.30) |
| OECD Countries | 45505.779(27489.705-65600.132) | 64219.666(43696.260-85943.757) | 0.411(0.149-0.781) | 1.47(1.31,1.64) | 5.470(3.325-7.876) | 3.353(2.362-4.426) | -0.387(-0.482--0.236) | -1.29(-1.43,-1.15) |
| Organization of Islamic Cooperation | 58998.950(35009.768-80734.998) | 83518.218(53557.852-113929.513) | 0.416(0.201-0.703) | 0.95(0.81,1.08) | 26.128(16.277-35.543) | 15.641(10.189-21.434) | -0.401(-0.495--0.278) | -1.84(-1.94,-1.74) |
| Sahel Region | 10525.384(6780.194-14398.033) | 14318.991(9097.058-19173.553) | 0.360(0.045-0.716) | 0.80(0.58,1.02) | 38.231(25.347-51.950) | 24.481(16.056-32.591) | -0.360(-0.508--0.196) | -1.62(-1.75,-1.50) |
| South Asia | 47982.044(28083.461-68450.299) | 100386.330(66974.492-135287.852) | 1.092(0.689-1.817) | 2.61(2.42,2.81) | 20.753(12.432-29.008) | 15.105(10.292-20.250) | -0.272(-0.415--0.023) | -0.94(-1.12,-0.75) |
| Southeast Asia, East Asia, and Oceania | 92379.771(60174.174-122583.783) | 58103.901(36005.691-82086.516) | -0.371(-0.528--0.130) | -1.80(-2.25,-1.36) | 19.740(13.029-26.125) | 4.227(2.572-6.067) | -0.786(-0.843--0.699) | -5.17(-5.47,-4.86) |
| Sub-Saharan Africa | 37884.757(25472.483-49723.820) | 61145.078(42002.612-79742.027) | 0.614(0.361-0.957) | 1.36(1.24,1.48) | 40.841(27.913-53.707) | 29.430(20.334-38.392) | -0.279(-0.397--0.126) | -1.23(-1.31,-1.14) |
| WHO region | 272833.713(183078.473-362848.372) | 343893.312(240286.724-450792.550) | 0.260(0.119-0.442) | 0.76(0.55,0.97) | 13.754(9.193-18.280) | 7.450(5.183-9.763) | -0.458(-0.516--0.383) | -1.99(-2.14,-1.84) |
| World Bank Regions | 273672.266(183681.903-363859.662) | 345079.822(241071.430-452413.307) | 0.261(0.120-0.443) | 0.76(0.55,0.97) | 13.747(9.187-18.264) | 7.431(5.168-9.739) | -0.459(-0.517--0.385) | -1.99(-2.14,-1.84) |

Table 10：Cardiovascular disease DALY attributable to inadequate vegetable intake among males by region from1990 to 2021

|  | Number | | PC | EAPC | Rate | | PC | EAPC |
| --- | --- | --- | --- | --- | --- | --- | --- | --- |
| location | 1990 | 2021 | 1990-2021 | 1990-2021 | 1990 | 2021 | 1990-2021 | 1990-2021 |
| Global | 7710107.198(4833450.921-10371839.805) | 8666980.608(5364680.406-11630086.518) | 0.124(0.026-0.247) | 0.30(0.15,0.46) | 410.203(264.758-554.028) | 214.858(133.942-287.792) | -0.476(-0.521--0.420) | -2.17(-2.31,-2.03) |
| High SDI | 938982.885(560758.979-1345608.569) | 987403.645(694950.551-1313998.416) | 0.052(-0.077-0.311) | 0.55(0.34,0.75) | 203.165(121.358-292.593) | 115.093(82.217-152.860) | -0.434(-0.505--0.288) | -1.49(-1.69,-1.30) |
| High-middle SDI | 1181984.443(771474.199-1634042.184) | 771878.963(476482.471-1131773.530) | -0.347(-0.442--0.251) | -1.63(-1.76,-1.51) | 281.980(187.203-389.200) | 92.475(57.427-135.553) | -0.672(-0.719--0.621) | -3.75(-3.85,-3.65) |
| Middle SDI | 2620960.096(1711021.914-3438624.138) | 2540788.525(1652739.104-3503870.802) | -0.031(-0.163-0.144) | -0.24(-0.50,0.03) | 520.741(357.141-680.409) | 201.840(132.226-278.166) | -0.612(-0.668--0.542) | -3.19(-3.43,-2.95) |
| Low-middle SDI | 1929490.334(1070872.618-2684407.961) | 2762327.866(1615970.732-3725001.220) | 0.432(0.245-0.697) | 1.12(1.05,1.20) | 577.524(333.546-797.066) | 382.791(228.081-517.165) | -0.337(-0.422--0.217) | -1.39(-1.44,-1.33) |
| Low SDI | 1029602.835(559841.056-1455677.530) | 1594493.447(855617.007-2229865.246) | 0.549(0.374-0.801) | 1.21(1.08,1.34) | 839.230(479.605-1179.158) | 579.010(320.753-811.005) | -0.310(-0.386--0.187) | -1.40(-1.50,-1.30) |
| African Union | 1089885.536(631271.096-1491980.091) | 1616033.913(955554.103-2216832.778) | 0.483(0.309-0.682) | 1.00(0.86,1.13) | 734.285(441.637-1002.491) | 473.696(291.479-647.093) | -0.355(-0.428--0.273) | -1.67(-1.77,-1.56) |
| Association of Southeast Asian Nations | 994184.585(484845.525-1413581.509) | 1350556.456(848719.232-1853371.654) | 0.358(0.092-0.866) | 0.98(0.78,1.17) | 770.307(395.257-1087.793) | 426.184(275.006-582.584) | -0.447(-0.550--0.263) | -1.92(-2.09,-1.76) |
| Central Europe, Eastern Europe, and Central Asia | 602086.596(334881.949-899705.583) | 478031.766(276542.726-713863.493) | -0.206(-0.283--0.112) | -1.26(-1.61,-0.92) | 329.791(183.508-494.024) | 187.960(109.857-280.521) | -0.430(-0.486--0.362) | -2.27(-2.62,-1.91) |
| Commonwealth | 2255091.355(1218504.542-3175183.350) | 3509667.421(1951213.391-4908218.396) | 0.556(0.344-0.857) | 1.39(1.35,1.43) | 480.285(267.454-675.548) | 335.617(190.579-471.866) | -0.301(-0.394--0.168) | -1.23(-1.28,-1.17) |
| European Union | 488633.502(283532.030-713622.707) | 365605.202(242132.182-501381.144) | -0.252(-0.340--0.089) | -0.84(-0.98,-0.70) | 203.148(118.735-295.896) | 88.926(58.595-122.627) | -0.562(-0.609--0.474) | -2.59(-2.67,-2.50) |
| Four World Regions | 7690206.766(4821273.071-10345589.064) | 8648237.719(5352395.069-11606180.733) | 0.125(0.027-0.248) | 0.31(0.15,0.46) | 409.968(264.700-553.738) | 214.733(133.849-287.661) | -0.476(-0.521--0.420) | -2.17(-2.31,-2.03) |
| G20 | 4706550.961(3087363.972-6313358.897) | 4708410.366(2997924.398-6413164.934) | 0.000(-0.116-0.146) | 0.08(-0.14,0.30) | 333.977(222.861-448.769) | 159.614(102.056-216.360) | -0.522(-0.578--0.451) | -2.31(-2.51,-2.11) |
| Gulf Cooperation Council | 24927.076(15333.974-36967.395) | 95141.292(53501.152-143973.161) | 2.817(1.779-4.219) | 4.76(4.58,4.95) | 518.358(314.207-767.894) | 368.090(227.242-539.535) | -0.290(-0.470--0.061) | -0.98(-1.24,-0.72) |
| Health System Grouping Levels | 7701020.593(4827913.376-10359673.466) | 8656892.445(5358323.688-11616712.374) | 0.124(0.026-0.248) | 0.30(0.15,0.46) | 410.163(264.766-553.969) | 214.790(133.897-287.694) | -0.476(-0.521--0.420) | -2.17(-2.31,-2.04) |
| High-income | 885224.531(527778.011-1265250.592) | 968175.526(694472.982-1286507.163) | 0.094(-0.042-0.395) | 0.73(0.55,0.92) | 179.318(107.267-256.782) | 109.156(79.447-143.922) | -0.391(-0.466--0.227) | -1.19(-1.36,-1.02) |
| Latin America and Caribbean | 524114.401(318654.646-710263.295) | 672361.187(440333.523-902893.502) | 0.283(0.150-0.450) | 0.88(0.65,1.11) | 468.410(294.926-628.894) | 234.418(154.346-314.089) | -0.500(-0.550--0.443) | -2.21(-2.43,-1.99) |
| League of Arab States | 313781.938(201765.958-435938.027) | 501429.575(304751.558-711985.919) | 0.598(0.353-0.869) | 1.34(1.11,1.57) | 578.307(379.858-789.628) | 332.860(205.274-470.694) | -0.424(-0.514--0.330) | -1.99(-2.17,-1.81) |
| Nordic Region | 41739.838(22343.776-61626.019) | 20320.219(12933.385-28213.605) | -0.513(-0.577--0.367) | -2.22(-2.46,-1.97) | 273.042(146.656-401.219) | 80.261(51.014-112.220) | -0.706(-0.741--0.621) | -3.80(-3.97,-3.64) |
| North Africa and Middle East | 470410.408(302643.760-641650.064) | 623140.095(390471.210-884879.403) | 0.325(0.134-0.553) | 0.67(0.43,0.91) | 551.620(363.624-740.404) | 259.926(164.235-365.161) | -0.529(-0.597--0.449) | -2.70(-2.89,-2.52) |
| OECD Countries | 1038255.374(613937.952-1495755.265) | 1136901.621(792497.285-1534761.346) | 0.095(-0.021-0.367) | 0.64(0.46,0.83) | 185.309(109.922-266.620) | 109.058(77.057-146.348) | -0.411(-0.474--0.267) | -1.40(-1.58,-1.23) |
| Organization of Islamic Cooperation | 1906691.746(1048175.458-2656731.088) | 2689345.955(1564527.573-3686119.734) | 0.410(0.225-0.652) | 0.93(0.83,1.04) | 680.256(395.722-941.975) | 398.232(240.108-544.482) | -0.415(-0.488--0.317) | -1.93(-2.03,-1.83) |
| Sahel Region | 247870.071(145169.455-351271.591) | 397396.908(238015.285-553435.982) | 0.603(0.305-0.940) | 1.37(1.23,1.51) | 711.367(434.919-998.488) | 499.459(307.352-700.661) | -0.298(-0.427--0.154) | -1.33(-1.43,-1.22) |
| South Asia | 1650816.303(866387.400-2355397.167) | 2737517.622(1453986.451-3970387.332) | 0.658(0.392-1.059) | 1.68(1.64,1.71) | 494.310(270.412-709.424) | 360.849(195.670-524.154) | -0.270(-0.390--0.094) | -1.02(-1.06,-0.98) |
| Southeast Asia, East Asia, and Oceania | 2679596.773(1803219.658-3566040.252) | 1780537.045(1137893.385-2517913.262) | -0.336(-0.459--0.189) | -1.56(-1.99,-1.13) | 518.048(363.907-688.110) | 138.845(89.471-199.712) | -0.732(-0.786--0.666) | -4.45(-4.81,-4.08) |
| Sub-Saharan Africa | 897858.186(499303.889-1247391.389) | 1407217.367(799051.453-1945599.342) | 0.567(0.383-0.798) | 1.16(1.03,1.29) | 795.607(460.860-1107.603) | 559.889(334.839-773.022) | -0.296(-0.373--0.197) | -1.41(-1.53,-1.29) |
| WHO region | 7671617.231(4805586.738-10322696.263) | 8629820.748(5337052.996-11584226.802) | 0.125(0.027-0.248) | 0.30(0.15,0.46) | 410.756(265.001-554.905) | 215.262(134.057-288.431) | -0.476(-0.520--0.420) | -2.17(-2.31,-2.04) |
| World Bank Regions | 7699927.079(4826972.379-10358156.294) | 8655957.337(5357814.228-11615651.452) | 0.124(0.026-0.248) | 0.30(0.15,0.46) | 410.298(264.836-554.119) | 214.843(133.932-287.771) | -0.476(-0.521--0.420) | -2.17(-2.31,-2.04) |

Table 11：Cardiovascular disease DALY attributable to inadequate vegetable intake among females by region from1990 to 2021

|  | Number | | PC | EAPC | Rate | | PC | EAPC |
| --- | --- | --- | --- | --- | --- | --- | --- | --- |
| location | 1990 | 2021 | 1990-2021 | 1990-2021 | 1990 | 2021 | 1990-2021 | 1990-2021 |
| Global | 6404593.781(4140166.215-8578107.628) | 7334515.928(4903347.891-9610800.620) | 0.145(0.023-0.302) | 0.39(0.17,0.61) | 302.235(196.648-404.657) | 161.244(106.979-211.460) | -0.466(-0.522--0.395) | -2.09(-2.27,-1.91) |
| High SDI | 663749.855(410501.860-953266.121) | 707756.862(506488.511-931304.879) | 0.066(-0.099-0.333) | 0.57(0.38,0.75) | 101.620(63.313-145.344) | 58.562(41.824-77.409) | -0.424(-0.506--0.293) | -1.43(-1.61,-1.24) |
| High-middle SDI | 894633.637(582437.304-1235203.589) | 620290.073(398480.988-899670.867) | -0.307(-0.417--0.190) | -1.36(-1.51,-1.20) | 165.581(108.605-227.604) | 55.700(35.731-80.468) | -0.664(-0.713--0.611) | -3.65(-3.75,-3.55) |
| Middle SDI | 2138909.775(1429965.851-2796514.152) | 1913730.934(1294536.357-2566069.858) | -0.105(-0.248-0.107) | -0.54(-0.91,-0.17) | 417.170(283.904-544.601) | 138.957(94.319-186.697) | -0.667(-0.719--0.587) | -3.71(-4.02,-3.40) |
| Low-middle SDI | 1663799.662(970826.396-2307403.533) | 2409001.463(1529687.709-3189430.225) | 0.448(0.242-0.773) | 1.22(1.06,1.38) | 538.098(324.305-737.736) | 323.757(210.999-427.160) | -0.398(-0.483--0.263) | -1.66(-1.79,-1.53) |
| Low SDI | 1036199.836(619466.292-1386128.703) | 1675172.524(1066647.599-2214363.340) | 0.617(0.403-0.926) | 1.41(1.27,1.56) | 914.330(565.593-1211.914) | 641.692(430.615-843.225) | -0.298(-0.394--0.165) | -1.29(-1.41,-1.18) |
| African Union | 1152648.441(749841.019-1513649.058) | 1696937.466(1125310.489-2224523.782) | 0.472(0.251-0.759) | 1.06(0.93,1.19) | 802.354(539.269-1054.108) | 503.476(344.836-656.293) | -0.373(-0.466--0.249) | -1.66(-1.74,-1.58) |
| Association of Southeast Asian Nations | 858518.447(427351.587-1243579.722) | 949232.603(595128.287-1295832.246) | 0.106(-0.102-0.540) | 0.18(-0.01,0.36) | 616.011(321.402-880.845) | 280.224(177.338-380.056) | -0.545(-0.629--0.379) | -2.64(-2.80,-2.49) |
| Central Europe, Eastern Europe, and Central Asia | 445192.570(249226.534-674058.175) | 381205.635(219805.128-573780.814) | -0.144(-0.239--0.030) | -1.01(-1.28,-0.74) | 155.253(87.330-233.999) | 92.626(53.682-138.903) | -0.403(-0.468--0.327) | -2.23(-2.57,-1.89) |
| Commonwealth | 1885759.832(1121129.300-2603449.238) | 3115786.121(2028251.161-4160650.366) | 0.652(0.394-1.054) | 1.68(1.53,1.84) | 427.703(261.609-587.149) | 291.269(192.799-388.132) | -0.319(-0.423--0.159) | -1.24(-1.37,-1.11) |
| European Union | 375228.065(234340.056-539728.892) | 383221.412(256839.158-517341.292) | 0.021(-0.174-0.297) | 0.38(0.26,0.50) | 102.640(64.142-146.689) | 52.942(35.839-71.134) | -0.484(-0.570--0.366) | -1.93(-2.00,-1.86) |
| Four World Regions | 6390101.744(4131509.680-8558305.802) | 7319850.260(4893213.693-9591810.344) | 0.145(0.023-0.303) | 0.39(0.17,0.62) | 302.178(196.661-404.555) | 161.214(106.962-211.423) | -0.466(-0.522--0.395) | -2.09(-2.27,-1.91) |
| G20 | 3808275.040(2561065.739-5064262.640) | 3839897.162(2614522.191-5058127.206) | 0.008(-0.123-0.183) | 0.14(-0.16,0.45) | 233.778(157.053-310.183) | 111.754(76.230-147.270) | -0.522(-0.581--0.445) | -2.28(-2.55,-2.02) |
| Gulf Cooperation Council | 15421.547(8878.674-23213.968) | 38113.229(23974.156-56558.327) | 1.471(0.685-2.803) | 3.18(3.08,3.27) | 482.144(281.351-726.691) | 296.240(188.462-439.219) | -0.386(-0.581--0.049) | -1.32(-1.47,-1.16) |
| Health System Grouping Levels | 6397292.765(4135821.084-8568037.692) | 7325951.855(4897993.508-9599814.928) | 0.145(0.023-0.302) | 0.39(0.17,0.61) | 302.232(196.664-404.637) | 161.200(106.960-211.407) | -0.467(-0.522--0.395) | -2.09(-2.28,-1.91) |
| High-income | 643239.673(403290.150-914243.229) | 768913.344(548274.883-1003037.357) | 0.195(-0.008-0.509) | 1.04(0.86,1.22) | 90.317(56.794-128.012) | 57.232(42.241-74.742) | -0.366(-0.460--0.216) | -1.03(-1.21,-0.85) |
| Latin America and Caribbean | 432157.817(279634.602-567906.325) | 545045.687(380101.587-709303.009) | 0.261(0.129-0.433) | 0.63(0.42,0.84) | 369.328(242.716-486.147) | 161.309(112.520-210.066) | -0.563(-0.605--0.519) | -2.81(-3.04,-2.59) |
| League of Arab States | 261765.235(168527.350-364025.647) | 362643.819(220240.204-506472.813) | 0.385(0.107-0.733) | 0.86(0.64,1.08) | 528.415(344.569-731.086) | 283.028(174.305-399.383) | -0.464(-0.569--0.331) | -2.15(-2.32,-1.98) |
| Nordic Region | 24716.847(12736.238-36695.782) | 18449.179(12712.626-24688.528) | -0.254(-0.412-0.128) | -0.73(-1.01,-0.45) | 108.833(57.071-160.136) | 46.706(32.017-62.435) | -0.571(-0.655--0.372) | -2.53(-2.77,-2.29) |
| North Africa and Middle East | 351680.326(221644.935-484641.877) | 445891.039(278678.475-628458.444) | 0.268(0.034-0.537) | 0.52(0.31,0.72) | 431.819(279.893-599.774) | 200.294(126.702-284.625) | -0.536(-0.624--0.436) | -2.71(-2.90,-2.52) |
| OECD Countries | 763592.880(473382.458-1085433.236) | 909619.295(654295.581-1203660.069) | 0.191(0.015-0.468) | 0.91(0.73,1.09) | 96.970(60.579-137.163) | 59.283(42.695-78.516) | -0.389(-0.468--0.261) | -1.29(-1.46,-1.12) |
| Organization of Islamic Cooperation | 1573429.524(883355.844-2164112.193) | 2108045.630(1301013.275-2874828.017) | 0.340(0.149-0.625) | 0.77(0.63,0.90) | 592.244(346.469-812.933) | 325.021(207.185-444.306) | -0.451(-0.531--0.341) | -2.12(-2.22,-2.03) |
| Sahel Region | 277487.084(176447.938-375297.799) | 391297.618(243589.571-526077.516) | 0.410(0.090-0.782) | 0.93(0.71,1.15) | 862.877(553.775-1162.824) | 524.782(335.691-702.146) | -0.392(-0.528--0.231) | -1.78(-1.91,-1.66) |
| South Asia | 1325500.149(733425.917-1877458.145) | 2396802.337(1537082.522-3272982.916) | 0.808(0.483-1.365) | 2.08(1.90,2.26) | 468.171(270.432-663.834) | 320.077(207.689-434.776) | -0.316(-0.445--0.100) | -1.16(-1.32,-0.99) |
| Southeast Asia, East Asia, and Oceania | 2211899.807(1421455.514-2937648.573) | 1251987.014(780586.853-1719519.190) | -0.434(-0.551--0.270) | -2.14(-2.59,-1.69) | 397.416(258.973-525.715) | 87.937(55.027-121.557) | -0.779(-0.826--0.713) | -5.10(-5.49,-4.71) |
| Sub-Saharan Africa | 994923.438(638455.885-1307616.935) | 1544670.871(1017034.056-2035306.763) | 0.553(0.313-0.876) | 1.22(1.10,1.34) | 905.947(602.769-1186.967) | 602.241(408.832-789.701) | -0.335(-0.435--0.197) | -1.50(-1.59,-1.42) |
| WHO region | 6379067.909(4121890.617-8543759.379) | 7308107.823(4883494.772-9575118.581) | 0.146(0.023-0.303) | 0.39(0.17,0.61) | 302.708(196.871-405.279) | 161.736(107.280-212.078) | -0.466(-0.522--0.394) | -2.09(-2.27,-1.90) |
| World Bank Regions | 6396443.281(4135218.134-8566504.522) | 7325138.117(4897121.969-9598575.816) | 0.145(0.023-0.302) | 0.39(0.17,0.61) | 302.333(196.724-404.753) | 161.239(106.978-211.455) | -0.467(-0.523--0.395) | -2.09(-2.28,-1.91) |

Table 12：Stroke mortality attributable to a diet low in vegetables from 1990 to 2021

|  | Number | | PC | EAPC | Rate | | PC | EAPC |
| --- | --- | --- | --- | --- | --- | --- | --- | --- |
| location | 1990 | 2021 | 1990-2021 | 1990-2021 | 1990 | 2021 | 1990-2021 | 1990-2021 |
| Global | 93336.872(20439.099-163691.897) | 82976.928(16762.176-147317.308) | -0.111(-0.276-0.051) | -0.54(-0.71,-0.36) | 2.364(0.445-4.269) | 0.963(0.189-1.731) | -0.592(-0.636--0.536) | -3.03(-3.17,-2.89) |
| High SDI | 4886.453(-1453.814-10688.828) | 2888.700(-1503.826-6908.758) | -0.409(-0.836-0.130) | -1.65(-1.88,-1.42) | 0.437(-0.144-0.971) | 0.126(-0.035-0.273) | -0.712(-0.790--0.650) | -3.94(-4.15,-3.74) |
| High-middle SDI | 8753.512(2186.759-15834.470) | 4173.902(-346.478-8512.171) | -0.523(-1.065--0.376) | -2.70(-2.94,-2.45) | 0.934(0.099-1.834) | 0.212(-0.026-0.441) | -0.773(-0.969--0.715) | -5.02(-5.22,-4.82) |
| Middle SDI | 28051.773(6486.527-49614.302) | 17663.945(4535.707-31616.211) | -0.370(-0.615--0.086) | -1.63(-1.96,-1.30) | 2.842(0.502-5.330) | 0.678(0.160-1.261) | -0.761(-0.859--0.668) | -4.68(-4.93,-4.43) |
| Low-middle SDI | 31662.191(4505.796-56166.885) | 31645.070(6709.867-56832.290) | -0.001(-0.280-0.332) | -0.18(-0.30,-0.06) | 5.251(0.879-9.383) | 2.282(0.408-4.262) | -0.565(-0.702--0.429) | -2.87(-2.98,-2.76) |
| Low SDI | 19869.771(2205.554-35912.209) | 26498.558(4056.097-47246.520) | 0.334(0.116-0.625) | 0.70(0.59,0.81) | 8.835(1.308-16.331) | 5.219(0.896-9.644) | -0.409(-0.506--0.278) | -1.93(-2.02,-1.83) |
| African Union | 19238.855(2607.585-34638.354) | 25034.398(4060.012-45045.639) | 0.301(0.085-0.585) | 0.58(0.46,0.70) | 6.812(1.107-12.589) | 3.880(0.617-7.196) | -0.430(-0.535--0.303) | -2.03(-2.11,-1.95) |
| Association of Southeast Asian Nations | 22559.611(2430.917-40379.395) | 15221.700(3288.331-27082.014) | -0.325(-0.595-0.081) | -1.60(-1.91,-1.29) | 9.168(1.199-16.898) | 2.498(0.454-4.644) | -0.728(-0.882--0.569) | -4.38(-4.63,-4.14) |
| Central Europe, Eastern Europe, and Central Asia | 4645.240(551.154-8757.748) | 3080.410(-229.467-6298.851) | -0.337(-0.783--0.211) | -1.97(-2.23,-1.70) | 1.028(-0.056-2.089) | 0.467(-0.025-0.940) | -0.546(-0.617--0.459) | -3.19(-3.47,-2.91) |
| Commonwealth | 32401.604(5423.625-56839.397) | 36373.145(7863.881-63920.890) | 0.123(-0.140-0.460) | 0.29(0.22,0.35) | 3.805(0.695-6.822) | 1.799(0.345-3.328) | -0.527(-0.636--0.399) | -2.52(-2.61,-2.44) |
| European Union | 3174.152(-1166.996-7061.651) | 1339.151(-1081.398-3480.939) | -0.578(-1.295-0.081) | -3.06(-3.25,-2.87) | 0.525(-0.201-1.178) | 0.119(-0.060-0.282) | -0.773(-0.870--0.658) | -5.04(-5.21,-4.86) |
| Four World Regions | 93124.717(20404.768-163309.500) | 82808.896(16747.837-147006.077) | -0.111(-0.276-0.051) | -0.53(-0.71,-0.36) | 2.363(0.445-4.267) | 0.963(0.189-1.731) | -0.592(-0.636--0.536) | -3.03(-3.17,-2.89) |
| G20 | 42778.377(10488.446-73719.035) | 30922.091(8304.586-55659.312) | -0.277(-0.506--0.139) | -1.01(-1.21,-0.80) | 1.426(0.310-2.582) | 0.475(0.126-0.858) | -0.667(-0.722--0.619) | -3.48(-3.64,-3.31) |
| Gulf Cooperation Council | 49.387(15.857-88.310) | 144.633(75.268-225.627) | 1.929(1.001-5.105) | 3.73(3.47,4.00) | 0.706(-0.038-1.486) | 0.460(0.067-0.864) | -0.347(-0.699-0.191) | -1.17(-1.54,-0.79) |
| Health System Grouping Levels | 93223.699(20418.564-163493.737) | 82870.177(16741.241-147122.913) | -0.111(-0.276-0.051) | -0.54(-0.71,-0.36) | 2.364(0.445-4.268) | 0.963(0.189-1.731) | -0.593(-0.636--0.536) | -3.03(-3.17,-2.89) |
| High-income | 4614.773(-1745.126-10406.895) | 2888.441(-1883.220-7205.506) | -0.374(-0.980-0.238) | -1.33(-1.58,-1.08) | 0.380(-0.152-0.867) | 0.116(-0.039-0.260) | -0.695(-0.756--0.627) | -3.61(-3.86,-3.36) |
| Latin America and Caribbean | 7441.164(1651.589-12893.063) | 5354.192(1052.010-9704.802) | -0.280(-0.551--0.053) | -1.38(-1.85,-0.91) | 3.314(0.620-5.946) | 0.868(0.174-1.612) | -0.738(-0.815--0.680) | -4.59(-5.03,-4.15) |
| League of Arab States | 1954.597(543.926-3375.545) | 2855.947(870.347-4982.012) | 0.461(0.181-0.787) | 0.90(0.67,1.14) | 1.914(0.462-3.533) | 1.035(0.219-1.967) | -0.459(-0.594--0.338) | -2.27(-2.44,-2.10) |
| Nordic Region | 325.536(-82.566-705.761) | 99.414(-88.995-261.578) | -0.695(-1.280-0.184) | -4.04(-4.18,-3.90) | 0.815(-0.148-1.722) | 0.144(-0.101-0.357) | -0.823(-1.109--0.414) | -5.73(-5.82,-5.63) |
| North Africa and Middle East | 2920.691(913.299-4948.782) | 3389.523(1083.722-5815.144) | 0.161(-0.072-0.466) | -0.02(-0.24,0.19) | 1.786(0.448-3.204) | 0.729(0.195-1.336) | -0.592(-0.685--0.495) | -3.35(-3.55,-3.15) |
| OECD Countries | 5684.978(-1596.184-12310.983) | 3673.378(-1768.329-8629.226) | -0.354(-0.790-0.122) | -1.41(-1.64,-1.19) | 0.423(-0.134-0.927) | 0.133(-0.033-0.287) | -0.685(-0.793--0.610) | -3.73(-3.94,-3.51) |
| Organization of Islamic Cooperation | 33616.724(4753.778-59816.654) | 36765.506(7526.841-65840.167) | 0.094(-0.156-0.431) | 0.13(0.01,0.25) | 6.487(1.066-11.685) | 2.997(0.479-5.576) | -0.538(-0.680--0.382) | -2.64(-2.74,-2.54) |
| Sahel Region | 4366.069(766.393-7869.064) | 5521.123(1103.628-9839.573) | 0.265(0.042-0.571) | 0.70(0.49,0.91) | 6.839(1.347-12.823) | 3.929(0.710-7.317) | -0.426(-0.546--0.278) | -1.81(-1.93,-1.70) |
| South Asia | 23036.367(3627.525-40798.491) | 26459.831(6283.512-46423.740) | 0.149(-0.153-0.535) | 0.45(0.37,0.52) | 4.137(0.734-7.490) | 1.861(0.358-3.480) | -0.550(-0.684--0.411) | -2.63(-2.71,-2.55) |
| Southeast Asia, East Asia, and Oceania | 32173.735(6925.344-56535.437) | 17351.093(3662.663-30999.854) | -0.461(-0.633--0.267) | -2.23(-2.61,-1.86) | 2.994(0.519-5.592) | 0.627(0.122-1.156) | -0.790(-0.852--0.722) | -5.17(-5.45,-4.88) |
| Sub-Saharan Africa | 18504.902(2176.744-33217.468) | 24453.439(3726.052-44208.879) | 0.321(0.098-0.634) | 0.63(0.52,0.75) | 8.707(1.322-16.208) | 5.180(0.814-9.645) | -0.405(-0.518--0.258) | -1.89(-1.97,-1.81) |
| WHO region | 93037.418(20370.239-163160.275) | 82782.493(16754.427-146952.440) | -0.110(-0.276-0.053) | -0.53(-0.71,-0.36) | 2.371(0.447-4.280) | 0.968(0.190-1.739) | -0.592(-0.636--0.535) | -3.03(-3.16,-2.89) |
| World Bank Regions | 93216.880(20418.190-163479.750) | 82864.182(16742.821-147108.434) | -0.111(-0.276-0.051) | -0.54(-0.71,-0.36) | 2.365(0.445-4.270) | 0.963(0.189-1.731) | -0.593(-0.636--0.536) | -3.03(-3.17,-2.89) |

Table 13：Stroke DALY attributable to a diet low in vegetables from 1990 to 2021

|  | Number | | PC | EAPC | Rate | | PC | EAPC |
| --- | --- | --- | --- | --- | --- | --- | --- | --- |
| location | 1990 | 2021 | 1990-2021 | 1990-2021 | 1990 | 2021 | 1990-2021 | 1990-2021 |
| Global | 2906480.899(587831.246-4902160.427) | 2540438.902(644870.323-4266752.273) | -0.126(-0.217-0.056) | -0.59(-0.78,-0.41) | 68.639(14.582-117.603) | 29.328(7.429-49.351) | -0.573(-0.610--0.509) | -2.89(-3.06,-2.73) |
| High SDI | 116327.140(29181.787-203262.924) | 80455.742(16587.760-143442.070) | -0.308(-0.400--0.243) | -0.98(-1.20,-0.75) | 10.601(2.840-18.427) | 4.355(1.791-7.246) | -0.589(-0.641--0.337) | -2.63(-2.86,-2.41) |
| High-middle SDI | 243452.420(110457.335-379014.283) | 107955.792(41774.246-181353.834) | -0.557(-0.702--0.453) | -2.92(-3.23,-2.61) | 24.127(10.160-39.218) | 5.582(2.185-9.377) | -0.769(-0.820--0.722) | -4.94(-5.22,-4.66) |
| Middle SDI | 895875.888(195337.408-1510957.549) | 533474.863(174882.704-885969.604) | -0.405(-0.510--0.101) | -1.84(-2.16,-1.51) | 77.920(18.437-134.304) | 19.309(6.215-32.619) | -0.752(-0.791--0.650) | -4.60(-4.89,-4.30) |
| Low-middle SDI | 1013780.497(137489.816-1756410.310) | 945809.540(220407.712-1607528.831) | -0.067(-0.212-0.234) | -0.41(-0.53,-0.29) | 147.015(22.050-259.359) | 61.301(14.855-105.942) | -0.583(-0.655--0.453) | -2.99(-3.09,-2.89) |
| Low SDI | 633585.729(69928.519-1109050.028) | 869415.247(133198.214-1497931.576) | 0.372(0.158-0.658) | 0.79(0.67,0.90) | 246.716(31.684-440.070) | 146.586(24.955-255.507) | -0.406(-0.496--0.286) | -1.93(-2.02,-1.83) |
| African Union | 615171.560(77421.124-1071444.328) | 818592.707(132811.804-1408656.787) | 0.331(0.130-0.623) | 0.65(0.53,0.77) | 191.437(28.635-337.732) | 107.566(19.834-188.497) | -0.438(-0.528--0.316) | -2.09(-2.18,-2.01) |
| Association of Southeast Asian Nations | 750313.905(78357.822-1317181.887) | 475981.582(123270.283-802338.980) | -0.366(-0.503-0.047) | -1.79(-2.10,-1.47) | 265.453(32.284-472.578) | 70.070(18.733-120.117) | -0.736(-0.801--0.569) | -4.50(-4.78,-4.22) |
| Central Europe, Eastern Europe, and Central Asia | 116713.248(51082.936-190627.365) | 77050.695(29375.748-128650.358) | -0.340(-0.460--0.264) | -1.98(-2.23,-1.73) | 24.675(9.389-41.428) | 12.116(4.964-19.956) | -0.509(-0.558--0.438) | -2.88(-3.12,-2.64) |
| Commonwealth | 1017666.840(165595.369-1759428.655) | 1097904.635(263245.526-1867945.008) | 0.079(-0.095-0.383) | 0.15(0.09,0.21) | 106.866(18.459-185.655) | 50.012(12.356-85.863) | -0.532(-0.604--0.409) | -2.56(-2.63,-2.48) |
| European Union | 70217.706(13443.717-126919.404) | 31010.398(-198.866-61006.454) | -0.558(-0.943--0.489) | -2.89(-3.06,-2.72) | 11.942(2.650-21.161) | 3.462(0.828-6.059) | -0.710(-0.737--0.654) | -4.23(-4.41,-4.05) |
| Four World Regions | 2900192.549(586529.644-4891233.564) | 2535617.957(643918.272-4258731.145) | -0.126(-0.217-0.056) | -0.59(-0.78,-0.41) | 68.627(14.579-117.585) | 29.318(7.430-49.336) | -0.573(-0.610--0.509) | -2.89(-3.06,-2.73) |
| G20 | 1311624.589(374642.825-2150393.583) | 901553.211(316167.380-1460092.940) | -0.313(-0.416--0.142) | -1.17(-1.40,-0.94) | 40.994(11.951-68.346) | 14.162(4.955-22.960) | -0.655(-0.693--0.587) | -3.36(-3.57,-3.16) |
| Gulf Cooperation Council | 1569.086(849.067-2439.403) | 6133.403(3595.769-9125.287) | 2.909(1.843-4.669) | 4.93(4.65,5.20) | 16.933(6.380-29.250) | 12.858(6.341-20.997) | -0.241(-0.432-0.107) | -0.61(-1.01,-0.20) |
| Health System Grouping Levels | 2903021.674(587173.305-4896276.916) | 2537111.185(644234.136-4261427.408) | -0.126(-0.217-0.056) | -0.59(-0.78,-0.41) | 68.631(14.581-117.589) | 29.314(7.428-49.331) | -0.573(-0.610--0.509) | -2.89(-3.06,-2.73) |
| High-income | 107416.540(21455.712-193063.341) | 77046.898(10019.689-141761.115) | -0.283(-0.426--0.220) | -0.73(-0.98,-0.48) | 9.092(2.073-16.129) | 4.000(1.507-6.736) | -0.560(-0.617--0.271) | -2.27(-2.53,-2.00) |
| Latin America and Caribbean | 237777.294(49079.558-405062.777) | 153489.571(43886.155-253706.818) | -0.354(-0.473--0.138) | -1.81(-2.34,-1.28) | 94.299(21.659-161.836) | 24.232(6.725-40.189) | -0.743(-0.781--0.676) | -4.72(-5.23,-4.20) |
| League of Arab States | 62396.266(19513.432-103630.223) | 94519.514(31541.345-156447.589) | 0.515(0.228-0.880) | 1.04(0.83,1.26) | 52.374(15.537-88.486) | 28.429(9.081-48.636) | -0.457(-0.553--0.331) | -2.27(-2.43,-2.10) |
| Nordic Region | 7408.061(1632.612-13034.524) | 2297.260(-204.565-4637.000) | -0.690(-1.065--0.617) | -3.99(-4.22,-3.76) | 20.450(6.581-34.482) | 4.272(0.795-7.717) | -0.791(-0.882--0.749) | -5.22(-5.41,-5.03) |
| North Africa and Middle East | 89109.152(31392.314-143536.790) | 115432.801(43584.330-182465.438) | 0.295(0.079-0.637) | 0.37(0.17,0.58) | 47.743(15.952-79.002) | 21.422(7.974-35.260) | -0.551(-0.628--0.441) | -3.06(-3.26,-2.86) |
| OECD Countries | 136254.042(37049.813-238115.570) | 98828.229(21065.816-177101.696) | -0.275(-0.397--0.217) | -0.93(-1.14,-0.71) | 10.296(2.967-17.914) | 4.410(1.777-7.402) | -0.572(-0.624--0.373) | -2.61(-2.84,-2.39) |
| Organization of Islamic Cooperation | 1095616.464(145691.978-1902461.467) | 1159821.721(250823.913-1979823.544) | 0.059(-0.087-0.355) | 0.03(-0.09,0.15) | 185.974(27.833-327.926) | 80.999(18.663-141.400) | -0.564(-0.641--0.436) | -2.81(-2.90,-2.72) |
| Sahel Region | 138956.309(23134.572-242108.876) | 183506.275(37319.756-313914.119) | 0.321(0.105-0.649) | 0.83(0.61,1.06) | 192.121(35.073-342.891) | 107.992(24.565-187.991) | -0.438(-0.530--0.289) | -1.91(-2.01,-1.80) |
| South Asia | 731582.347(110980.803-1252181.606) | 782721.918(186286.265-1343793.144) | 0.070(-0.118-0.415) | 0.21(0.15,0.28) | 112.938(18.976-196.218) | 49.675(12.382-86.522) | -0.560(-0.640--0.423) | -2.68(-2.76,-2.60) |
| Southeast Asia, East Asia, and Oceania | 1030841.104(212717.601-1748005.020) | 533939.765(143480.242-887151.023) | -0.482(-0.573--0.309) | -2.37(-2.75,-2.00) | 82.812(18.303-142.750) | 18.806(5.135-31.350) | -0.773(-0.810--0.702) | -4.96(-5.31,-4.60) |
| Sub-Saharan Africa | 593041.214(64998.762-1044178.020) | 800757.255(122476.723-1378739.860) | 0.350(0.137-0.657) | 0.70(0.58,0.81) | 245.413(33.086-437.013) | 142.678(25.151-251.806) | -0.419(-0.513--0.286) | -1.98(-2.07,-1.90) |
| WHO region | 2897391.786(584959.249-4887101.967) | 2534654.588(643286.065-4257184.029) | -0.125(-0.216-0.058) | -0.59(-0.77,-0.41) | 68.844(14.600-117.980) | 29.439(7.458-49.544) | -0.572(-0.610--0.508) | -2.89(-3.05,-2.72) |
| World Bank Regions | 2902869.297(587132.153-4896034.909) | 2536992.079(644186.585-4261304.589) | -0.126(-0.217-0.056) | -0.59(-0.78,-0.41) | 68.660(14.587-117.640) | 29.324(7.430-49.348) | -0.573(-0.610--0.509) | -2.89(-3.06,-2.73) |

Table 14：Ischemic heart disease mortality attributable to a diet low in vegetables from 1990 to 2021

|  | Number | | PC | EAPC | Rate | | PC | EAPC |
| --- | --- | --- | --- | --- | --- | --- | --- | --- |
| location | 1990 | 2021 | 1990-2021 | 1990-2021 | 1990 | 2021 | 1990-2021 | 1990-2021 |
| Global | 188671.503(90058.741-293076.600) | 239771.403(112004.696-379248.018) | 0.271(0.199-0.339) | 0.65(0.53,0.76) | 5.227(2.433-8.191) | 2.850(1.325-4.513) | -0.455(-0.484--0.425) | -2.11(-2.20,-2.03) |
| High SDI | 48686.461(21479.427-78260.955) | 32426.619(13979.302-53380.994) | -0.334(-0.377--0.304) | -1.43(-1.54,-1.33) | 4.463(1.972-7.163) | 1.434(0.633-2.319) | -0.679(-0.693--0.666) | -3.78(-3.87,-3.69) |
| High-middle SDI | 39538.508(17727.701-63095.528) | 34413.342(14725.663-58048.825) | -0.130(-0.208--0.051) | -0.82(-1.00,-0.65) | 4.587(2.013-7.391) | 1.793(0.766-3.022) | -0.609(-0.643--0.572) | -3.39(-3.60,-3.19) |
| Middle SDI | 43208.719(20932.017-65742.048) | 68967.120(31971.863-110866.818) | 0.596(0.459-0.744) | 1.38(1.23,1.52) | 4.737(2.217-7.367) | 2.752(1.250-4.472) | -0.419(-0.469--0.362) | -1.90(-1.98,-1.81) |
| Low-middle SDI | 40038.993(19900.128-59653.577) | 72419.276(35026.138-109750.630) | 0.809(0.632-1.001) | 2.04(1.91,2.17) | 6.837(3.311-10.434) | 5.304(2.493-8.084) | -0.224(-0.297--0.144) | -0.75(-0.85,-0.65) |
| Low SDI | 16914.779(8091.983-25438.086) | 31274.386(15163.479-46660.992) | 0.849(0.667-1.054) | 1.87(1.77,1.98) | 8.050(3.788-12.357) | 6.636(3.130-10.058) | -0.176(-0.250--0.087) | -0.74(-0.83,-0.65) |
| African Union | 16263.700(7711.107-24811.080) | 27379.351(13086.414-42019.395) | 0.683(0.525-0.862) | 1.42(1.28,1.55) | 6.405(2.944-9.946) | 4.788(2.212-7.442) | -0.252(-0.318--0.181) | -1.17(-1.27,-1.07) |
| Association of Southeast Asian Nations | 14025.306(6733.683-21398.665) | 25766.654(12363.162-39268.918) | 0.837(0.558-1.119) | 2.05(1.93,2.17) | 5.998(2.821-9.226) | 4.295(2.011-6.561) | -0.284(-0.386--0.173) | -1.02(-1.10,-0.94) |
| Central Europe, Eastern Europe, and Central Asia | 31601.928(14003.449-50636.014) | 26437.582(11463.271-43732.554) | -0.163(-0.234--0.093) | -1.11(-1.38,-0.85) | 7.402(3.250-11.966) | 4.037(1.760-6.667) | -0.455(-0.499--0.410) | -2.54(-2.88,-2.20) |
| Commonwealth | 55805.366(27674.144-83737.734) | 102597.560(49958.078-156529.575) | 0.838(0.661-1.018) | 2.08(1.96,2.20) | 6.771(3.263-10.340) | 5.155(2.454-7.915) | -0.239(-0.307--0.168) | -0.83(-0.93,-0.73) |
| European Union | 25949.173(11385.601-41865.124) | 15503.365(6492.194-25615.667) | -0.403(-0.456--0.367) | -1.84(-1.93,-1.74) | 4.397(1.939-7.071) | 1.385(0.593-2.261) | -0.685(-0.706--0.669) | -3.92(-4.01,-3.84) |
| Four World Regions | 187966.779(89723.940-291977.445) | 239226.950(111757.669-378367.128) | 0.273(0.201-0.341) | 0.65(0.54,0.76) | 5.218(2.429-8.177) | 2.849(1.324-4.510) | -0.454(-0.484--0.425) | -2.11(-2.19,-2.02) |
| G20 | 126434.505(59599.425-198405.255) | 150235.297(70112.337-237935.856) | 0.188(0.120-0.268) | 0.59(0.45,0.72) | 4.587(2.112-7.272) | 2.356(1.102-3.727) | -0.486(-0.514--0.452) | -2.15(-2.26,-2.05) |
| Gulf Cooperation Council | 460.340(211.920-771.446) | 1515.309(699.438-2465.380) | 2.292(1.453-3.574) | 4.19(3.97,4.42) | 6.196(2.710-10.256) | 4.432(1.912-7.170) | -0.285(-0.439--0.057) | -0.89(-1.20,-0.59) |
| Health System Grouping Levels | 188387.460(89926.029-292638.916) | 239500.743(111882.341-378817.451) | 0.271(0.200-0.340) | 0.65(0.54,0.76) | 5.225(2.432-8.188) | 2.850(1.325-4.511) | -0.455(-0.484--0.425) | -2.11(-2.20,-2.03) |
| High-income | 46737.209(20505.832-75266.295) | 32163.650(13957.348-52816.050) | -0.312(-0.358--0.280) | -1.28(-1.36,-1.19) | 3.943(1.736-6.340) | 1.328(0.591-2.154) | -0.663(-0.677--0.650) | -3.56(-3.64,-3.48) |
| Latin America and Caribbean | 12108.552(5929.663-18660.984) | 20140.769(9280.299-31544.053) | 0.663(0.531-0.790) | 1.64(1.43,1.86) | 5.956(2.843-9.268) | 3.293(1.508-5.164) | -0.447(-0.491--0.407) | -1.98(-2.21,-1.74) |
| League of Arab States | 6993.747(3201.676-11186.505) | 11283.682(5123.505-18473.802) | 0.613(0.414-0.862) | 1.22(1.03,1.41) | 7.508(3.318-12.154) | 4.686(2.047-7.828) | -0.376(-0.453--0.288) | -1.83(-1.97,-1.70) |
| Nordic Region | 2601.351(1159.661-4126.636) | 1062.441(455.444-1740.545) | -0.592(-0.629--0.565) | -3.03(-3.08,-2.98) | 6.742(3.051-10.643) | 1.608(0.708-2.600) | -0.761(-0.780--0.747) | -4.68(-4.73,-4.64) |
| North Africa and Middle East | 10844.194(5087.481-17330.395) | 14563.295(6714.664-23760.753) | 0.343(0.183-0.527) | 0.57(0.35,0.78) | 7.060(3.211-11.327) | 3.481(1.554-5.727) | -0.507(-0.563--0.445) | -2.69(-2.88,-2.50) |
| OECD Countries | 53841.572(23723.669-86676.451) | 40873.516(17770.015-66911.013) | -0.241(-0.282--0.208) | -0.99(-1.10,-0.88) | 4.088(1.804-6.574) | 1.488(0.662-2.398) | -0.636(-0.650--0.623) | -3.38(-3.49,-3.27) |
| Organization of Islamic Cooperation | 36664.652(17870.206-55749.782) | 57405.648(27313.979-87994.194) | 0.566(0.420-0.737) | 1.23(1.08,1.38) | 7.541(3.591-11.681) | 4.934(2.266-7.619) | -0.346(-0.406--0.278) | -1.62(-1.74,-1.50) |
| Sahel Region | 3905.344(1807.375-6004.150) | 7040.303(3262.583-10753.118) | 0.803(0.562-1.097) | 1.85(1.76,1.95) | 6.711(3.045-10.495) | 5.613(2.559-8.721) | -0.164(-0.266--0.036) | -0.63(-0.73,-0.54) |
| South Asia | 41164.242(20507.782-60820.960) | 87350.197(42542.416-132290.322) | 1.122(0.874-1.397) | 2.62(2.50,2.74) | 7.220(3.483-10.878) | 6.170(2.932-9.404) | -0.145(-0.243--0.040) | -0.39(-0.51,-0.28) |
| Southeast Asia, East Asia, and Oceania | 34578.737(16627.057-53416.378) | 37101.731(16529.672-61927.856) | 0.073(-0.102-0.264) | 0.08(-0.13,0.29) | 3.606(1.671-5.668) | 1.451(0.632-2.462) | -0.598(-0.667--0.519) | -3.04(-3.13,-2.94) |
| Sub-Saharan Africa | 11636.641(5443.206-17666.725) | 22014.179(10728.719-33119.733) | 0.892(0.671-1.147) | 1.82(1.69,1.94) | 6.016(2.739-9.284) | 5.135(2.411-7.834) | -0.146(-0.238--0.043) | -0.73(-0.87,-0.60) |
| WHO region | 187674.945(89588.817-291520.832) | 238931.819(111639.814-377905.861) | 0.273(0.202-0.342) | 0.65(0.54,0.76) | 5.229(2.434-8.194) | 2.860(1.329-4.528) | -0.453(-0.483--0.424) | -2.10(-2.19,-2.02) |
| World Bank Regions | 188354.293(89914.163-292596.097) | 239471.431(111873.172-378769.631) | 0.271(0.200-0.340) | 0.65(0.54,0.76) | 5.227(2.433-8.191) | 2.850(1.325-4.512) | -0.455(-0.484--0.425) | -2.11(-2.20,-2.03) |

Table 15：Ischemic heart disease DALY attributable to a diet low in vegetables from 1990 to 2021

|  | Number | | PC | EAPC | Rate | | PC | EAPC |
| --- | --- | --- | --- | --- | --- | --- | --- | --- |
| location | 1990 | 2021 | 1990-2021 | 1990-2021 | 1990 | 2021 | 1990-2021 | 1990-2021 |
| Global | 4939716.209(2500408.008-7431816.647) | 6119247.904(3027217.113-9487533.986) | 0.239(0.163-0.312) | 0.56(0.45,0.67) | 122.121(60.718-185.566) | 71.255(35.198-110.537) | -0.417(-0.450--0.382) | -1.91(-2.01,-1.80) |
| High SDI | 998522.529(463988.893-1555333.033) | 614832.938(279901.338-971790.674) | -0.384(-0.414--0.359) | -1.63(-1.74,-1.52) | 92.617(43.315-143.768) | 31.927(14.965-50.629) | -0.655(-0.672--0.640) | -3.50(-3.61,-3.38) |
| High-middle SDI | 936475.316(441731.371-1451340.762) | 698957.715(315316.874-1152314.984) | -0.254(-0.317--0.193) | -1.39(-1.58,-1.19) | 96.980(45.316-151.076) | 36.507(16.556-59.959) | -0.624(-0.653--0.593) | -3.57(-3.77,-3.36) |
| Middle SDI | 1263114.180(632517.173-1877656.287) | 1822801.093(895058.238-2847218.033) | 0.443(0.325-0.564) | 1.03(0.89,1.18) | 113.448(55.895-170.772) | 66.923(32.528-105.025) | -0.410(-0.455--0.360) | -1.89(-2.01,-1.76) |
| Low-middle SDI | 1231278.295(632041.352-1786727.984) | 2053719.800(1036600.717-3103239.939) | 0.668(0.492-0.852) | 1.76(1.65,1.87) | 179.231(90.081-263.712) | 133.167(66.362-201.872) | -0.257(-0.333--0.176) | -0.90(-0.99,-0.81) |
| Low SDI | 503352.169(247438.400-744174.027) | 922395.599(461764.171-1361014.695) | 0.833(0.633-1.043) | 1.80(1.69,1.91) | 202.735(97.101-302.699) | 162.017(79.011-241.190) | -0.201(-0.280--0.113) | -0.90(-1.00,-0.81) |
| African Union | 461870.706(229327.203-696426.514) | 764314.908(376694.427-1151480.952) | 0.655(0.485-0.847) | 1.34(1.20,1.48) | 152.360(73.432-231.344) | 108.171(51.911-166.116) | -0.290(-0.358--0.215) | -1.37(-1.48,-1.26) |
| Association of Southeast Asian Nations | 431933.764(216186.674-647777.797) | 738814.071(371497.187-1111958.220) | 0.710(0.459-0.970) | 1.85(1.73,1.97) | 154.666(75.486-233.272) | 108.859(53.793-164.690) | -0.296(-0.399--0.192) | -1.05(-1.16,-0.95) |
| Central Europe, Eastern Europe, and Central Asia | 716847.305(334026.629-1126021.995) | 520367.979(233340.314-849595.398) | -0.274(-0.336--0.214) | -1.68(-2.01,-1.35) | 157.156(72.992-246.918) | 82.047(36.999-133.133) | -0.478(-0.520--0.435) | -2.74(-3.11,-2.38) |
| Commonwealth | 1659503.222(847484.503-2413391.380) | 2904771.299(1449053.885-4354999.312) | 0.750(0.564-0.939) | 1.91(1.81,2.00) | 175.343(88.297-259.196) | 132.731(65.885-200.069) | -0.243(-0.317--0.165) | -0.86(-0.94,-0.79) |
| European Union | 530846.748(244124.682-831703.723) | 256617.938(112692.224-412701.924) | -0.517(-0.553--0.489) | -2.55(-2.64,-2.46) | 92.291(42.938-143.982) | 27.179(12.320-43.382) | -0.706(-0.722--0.690) | -4.16(-4.26,-4.07) |
| Four World Regions | 4923408.711(2492220.613-7407141.952) | 6107604.611(3021592.630-9469365.485) | 0.241(0.165-0.314) | 0.57(0.45,0.68) | 121.953(60.634-185.305) | 71.234(35.188-110.508) | -0.416(-0.449--0.382) | -1.90(-2.00,-1.80) |
| G20 | 3230131.390(1613397.863-4872204.432) | 3731307.238(1845169.331-5777385.871) | 0.155(0.087-0.238) | 0.50(0.37,0.64) | 105.255(51.899-160.659) | 59.359(29.508-91.770) | -0.436(-0.469--0.395) | -1.85(-1.98,-1.72) |
| Gulf Cooperation Council | 13876.037(6302.875-23097.587) | 55037.432(26031.908-89669.529) | 2.966(1.900-4.581) | 5.01(4.73,5.29) | 145.437(66.802-244.779) | 111.574(50.078-181.787) | -0.233(-0.412-0.039) | -0.54(-0.91,-0.17) |
| Health System Grouping Levels | 4932742.489(2496966.902-7420951.019) | 6112707.145(3024046.258-9477712.800) | 0.239(0.163-0.313) | 0.56(0.45,0.67) | 122.081(60.699-185.503) | 71.240(35.191-110.515) | -0.416(-0.450--0.382) | -1.90(-2.01,-1.80) |
| High-income | 939365.054(434160.554-1466031.666) | 585797.255(267531.223-933065.127) | -0.376(-0.409--0.351) | -1.53(-1.61,-1.45) | 80.835(37.693-125.537) | 28.863(13.625-45.408) | -0.643(-0.655--0.630) | -3.31(-3.40,-3.22) |
| Latin America and Caribbean | 324092.024(162859.903-485686.567) | 500171.966(244604.082-774846.304) | 0.543(0.420-0.664) | 1.36(1.16,1.57) | 138.460(68.867-209.746) | 79.253(38.557-122.868) | -0.428(-0.473--0.385) | -1.90(-2.13,-1.67) |
| League of Arab States | 198355.286(93713.874-312788.932) | 314118.530(148794.381-510643.691) | 0.584(0.372-0.841) | 1.17(1.00,1.34) | 174.811(81.171-278.250) | 102.293(46.839-167.249) | -0.415(-0.486--0.324) | -2.06(-2.20,-1.93) |
| Nordic Region | 50492.433(23646.678-79340.328) | 17119.875(7768.455-27259.837) | -0.661(-0.686--0.639) | -3.57(-3.65,-3.49) | 142.063(67.918-221.705) | 30.348(14.301-47.142) | -0.786(-0.800--0.773) | -4.99(-5.04,-4.93) |
| North Africa and Middle East | 307173.731(149602.327-482713.979) | 406899.167(191817.343-643334.767) | 0.325(0.163-0.511) | 0.51(0.29,0.72) | 168.848(80.225-268.201) | 80.965(37.592-130.068) | -0.520(-0.577--0.456) | -2.80(-3.00,-2.61) |
| OECD Countries | 1108129.158(514982.787-1726970.154) | 766799.701(352217.555-1210331.447) | -0.308(-0.337--0.282) | -1.26(-1.39,-1.14) | 84.827(39.666-131.782) | 32.623(15.442-51.236) | -0.615(-0.629--0.601) | -3.17(-3.30,-3.03) |
| Organization of Islamic Cooperation | 1078021.148(538732.356-1605889.299) | 1641454.955(812176.291-2460929.467) | 0.523(0.371-0.702) | 1.16(1.02,1.30) | 189.367(93.073-284.273) | 117.090(56.674-178.080) | -0.382(-0.440--0.314) | -1.79(-1.90,-1.67) |
| Sahel Region | 109471.246(52541.504-169529.861) | 200938.576(97047.283-304769.525) | 0.836(0.578-1.157) | 1.90(1.81,2.00) | 160.418(75.622-246.081) | 127.761(59.775-194.410) | -0.204(-0.307--0.070) | -0.81(-0.91,-0.71) |
| South Asia | 1316968.134(673265.448-1910612.592) | 2521324.758(1254317.055-3769976.223) | 0.914(0.681-1.165) | 2.25(2.15,2.34) | 196.483(98.762-287.562) | 158.886(78.699-238.842) | -0.191(-0.286--0.085) | -0.61(-0.69,-0.53) |
| Southeast Asia, East Asia, and Oceania | 1003143.453(497274.790-1528993.435) | 956835.981(454328.531-1514828.994) | -0.046(-0.178-0.100) | -0.30(-0.55,-0.06) | 84.628(41.192-129.934) | 34.914(16.382-55.297) | -0.587(-0.644--0.522) | -3.00(-3.21,-2.80) |
| Sub-Saharan Africa | 332126.507(160734.233-494103.704) | 627850.799(314293.081-925858.828) | 0.890(0.661-1.159) | 1.80(1.68,1.92) | 145.708(68.669-220.062) | 119.180(58.161-178.840) | -0.182(-0.278--0.074) | -0.90(-1.03,-0.76) |
| WHO region | 4916076.538(2488629.315-7395947.480) | 6101690.053(3019199.006-9460860.176) | 0.241(0.165-0.315) | 0.57(0.46,0.68) | 122.256(60.791-185.765) | 71.495(35.320-110.916) | -0.415(-0.448--0.381) | -1.90(-2.00,-1.79) |
| World Bank Regions | 4932039.668(2496719.416-7419631.852) | 6112180.602(3023892.788-9476951.815) | 0.239(0.163-0.313) | 0.56(0.45,0.67) | 122.121(60.722-185.563) | 71.260(35.202-110.546) | -0.416(-0.450--0.382) | -1.90(-2.01,-1.80) |

Table 16：Lower extremity peripheral arterial disease mortality attributable to a diet low in vegetables from 1990 to 2021

|  | Number | | PC | EAPC | Rate | | PC | EAPC |
| --- | --- | --- | --- | --- | --- | --- | --- | --- |
| location | 1990 | 2021 | 1990-2021 | 1990-2021 | 1990 | 2021 | 1990-2021 | 1990-2021 |
| Global | 116.373(-23.089-300.982) | 141.867(-27.519-372.710) | 0.219(0.130-0.322) | 0.42(0.31,0.53) | 0.004(-0.001-0.010) | 0.002(-0.000-0.005) | -0.560(-0.593--0.524) | -2.86(-2.99,-2.74) |
| High SDI | 61.087(-12.511-152.373) | 65.619(-12.465-169.342) | 0.074(-0.041-0.176) | 0.04(-0.19,0.27) | 0.006(-0.001-0.014) | 0.003(-0.000-0.007) | -0.552(-0.593--0.512) | -2.79(-3.03,-2.55) |
| High-middle SDI | 39.019(-7.880-101.539) | 35.956(-7.393-93.719) | -0.079(-0.204-0.080) | -0.54(-0.76,-0.31) | 0.005(-0.001-0.014) | 0.002(-0.000-0.005) | -0.636(-0.683--0.576) | -3.52(-3.70,-3.35) |
| Middle SDI | 8.566(-1.776-21.837) | 19.179(-4.151-49.560) | 1.239(0.932-1.564) | 2.35(2.19,2.51) | 0.001(-0.000-0.003) | 0.001(-0.000-0.002) | -0.319(-0.414--0.226) | -1.54(-1.67,-1.41) |
| Low-middle SDI | 4.214(-0.683-10.853) | 12.635(-2.470-33.490) | 1.999(1.329-2.858) | 3.65(3.55,3.76) | 0.001(-0.000-0.003) | 0.001(-0.000-0.003) | 0.135(-0.103-0.440) | 0.41(0.30,0.51) |
| Low SDI | 3.270(-0.430-10.386) | 8.238(-1.267-26.027) | 1.519(0.916-2.495) | 3.04(2.80,3.28) | 0.002(-0.000-0.007) | 0.002(-0.000-0.007) | 0.124(-0.126-0.542) | 0.38(0.16,0.60) |
| African Union | 5.319(-0.764-16.408) | 13.336(-2.409-38.896) | 1.507(0.965-2.344) | 2.89(2.72,3.06) | 0.003(-0.000-0.008) | 0.003(-0.001-0.009) | 0.087(-0.134-0.434) | 0.17(0.04,0.29) |
| Association of Southeast Asian Nations | 0.623(-0.121-1.619) | 1.549(-0.373-4.018) | 1.485(0.758-2.488) | 2.79(2.62,2.96) | 0.000(-0.000-0.001) | 0.000(-0.000-0.001) | -0.086(-0.335-0.263) | -0.49(-0.61,-0.36) |
| Central Europe, Eastern Europe, and Central Asia | 35.345(-7.232-92.233) | 30.464(-6.594-77.112) | -0.138(-0.270-0.016) | -0.86(-1.10,-0.62) | 0.009(-0.002-0.023) | 0.005(-0.001-0.012) | -0.472(-0.552--0.378) | -2.52(-2.73,-2.31) |
| Commonwealth | 17.642(-3.498-45.453) | 25.767(-4.934-68.234) | 0.461(0.263-0.691) | 1.08(0.92,1.24) | 0.003(-0.001-0.008) | 0.002(-0.000-0.004) | -0.483(-0.549--0.402) | -2.32(-2.50,-2.14) |
| European Union | 34.048(-7.056-85.333) | 36.823(-6.974-95.791) | 0.081(-0.057-0.216) | 0.58(0.26,0.89) | 0.006(-0.001-0.015) | 0.003(-0.001-0.008) | -0.502(-0.557--0.445) | -1.95(-2.31,-1.60) |
| Four World Regions | 115.968(-23.006-300.017) | 141.051(-27.357-370.430) | 0.216(0.126-0.320) | 0.41(0.30,0.52) | 0.004(-0.001-0.010) | 0.002(-0.000-0.005) | -0.561(-0.594--0.525) | -2.87(-3.00,-2.74) |
| G20 | 99.061(-20.104-250.738) | 113.862(-22.390-297.543) | 0.149(0.059-0.243) | 0.27(0.15,0.40) | 0.004(-0.001-0.011) | 0.002(-0.000-0.005) | -0.593(-0.623--0.560) | -3.06(-3.20,-2.92) |
| Gulf Cooperation Council | 0.004(-0.001-0.012) | 0.073(-0.016-0.190) | 15.234(8.681-26.983) | 11.18(10.46,11.91) | 0.000(-0.000-0.000) | 0.000(-0.000-0.001) | 3.017(1.219-6.419) | 6.34(5.61,7.06) |
| Health System Grouping Levels | 116.156(-23.044-300.431) | 141.627(-27.471-372.089) | 0.219(0.130-0.322) | 0.42(0.31,0.53) | 0.004(-0.001-0.010) | 0.002(-0.000-0.005) | -0.560(-0.593--0.524) | -2.87(-2.99,-2.74) |
| High-income | 63.787(-13.149-160.356) | 69.794(-13.284-179.646) | 0.094(-0.025-0.199) | 0.14(-0.06,0.35) | 0.005(-0.001-0.014) | 0.003(-0.000-0.006) | -0.540(-0.578--0.499) | -2.64(-2.84,-2.45) |
| Latin America and Caribbean | 6.985(-1.499-17.653) | 17.243(-3.751-44.646) | 1.469(1.122-1.814) | 2.66(2.47,2.85) | 0.004(-0.001-0.010) | 0.003(-0.001-0.008) | -0.293(-0.392--0.195) | -1.50(-1.72,-1.28) |
| League of Arab States | 0.108(-0.017-0.305) | 0.369(-0.066-1.067) | 2.429(1.390-4.007) | 4.33(4.06,4.60) | 0.000(-0.000-0.000) | 0.000(-0.000-0.001) | 0.279(-0.111-0.854) | 1.00(0.79,1.21) |
| Nordic Region | 5.090(-1.046-12.981) | 2.761(-0.547-7.207) | -0.457(-0.545--0.371) | -1.82(-2.13,-1.51) | 0.012(-0.003-0.032) | 0.004(-0.001-0.009) | -0.703(-0.747--0.658) | -3.70(-4.00,-3.39) |
| North Africa and Middle East | 0.088(-0.015-0.268) | 0.242(-0.051-0.637) | 1.748(0.601-4.382) | 4.77(4.00,5.55) | 0.000(-0.000-0.000) | 0.000(-0.000-0.000) | -0.131(-0.505-0.712) | 0.70(0.10,1.31) |
| OECD Countries | 71.827(-14.841-180.008) | 77.966(-14.902-199.435) | 0.085(-0.021-0.184) | 0.11(-0.06,0.29) | 0.006(-0.001-0.014) | 0.003(-0.000-0.006) | -0.553(-0.590--0.514) | -2.77(-2.95,-2.59) |
| Organization of Islamic Cooperation | 3.189(-0.448-9.555) | 7.601(-1.304-21.877) | 1.384(0.817-2.214) | 2.70(2.59,2.82) | 0.001(-0.000-0.003) | 0.001(-0.000-0.002) | -0.015(-0.244-0.317) | -0.23(-0.32,-0.15) |
| Sahel Region | 1.071(-0.139-3.482) | 2.359(-0.314-7.536) | 1.203(0.669-2.011) | 2.52(2.32,2.72) | 0.002(-0.000-0.008) | 0.003(-0.000-0.008) | 0.042(-0.206-0.416) | 0.06(-0.09,0.21) |
| South Asia | 2.358(-0.377-6.738) | 8.217(-1.574-23.132) | 2.485(1.384-4.220) | 4.47(4.30,4.65) | 0.001(-0.000-0.002) | 0.001(-0.000-0.002) | 0.267(-0.126-0.941) | 1.07(0.90,1.24) |
| Southeast Asia, East Asia, and Oceania | 2.510(-0.449-6.487) | 2.671(-0.583-7.040) | 0.064(-0.326-0.631) | -0.36(-0.75,0.02) | 0.000(-0.000-0.001) | 0.000(-0.000-0.000) | -0.636(-0.773--0.437) | -3.75(-3.98,-3.52) |
| Sub-Saharan Africa | 5.300(-0.760-16.368) | 13.237(-2.389-38.695) | 1.497(0.957-2.326) | 2.88(2.72,3.05) | 0.004(-0.001-0.011) | 0.004(-0.001-0.012) | 0.128(-0.104-0.486) | 0.28(0.18,0.38) |
| WHO region | 115.957(-23.004-299.992) | 141.022(-27.351-370.358) | 0.216(0.126-0.320) | 0.41(0.30,0.52) | 0.004(-0.001-0.010) | 0.002(-0.000-0.005) | -0.560(-0.592--0.523) | -2.86(-2.99,-2.73) |
| World Bank Regions | 116.150(-23.043-300.413) | 141.622(-27.470-372.079) | 0.219(0.130-0.322) | 0.42(0.31,0.53) | 0.004(-0.001-0.010) | 0.002(-0.000-0.005) | -0.560(-0.593--0.524) | -2.87(-2.99,-2.74) |

Table 17：Lower extremity peripheral arterial disease DALY attributable to a diet low in vegetables from 1990 to 2021

|  | Number | | PC | EAPC | Rate | | PC | EAPC |
| --- | --- | --- | --- | --- | --- | --- | --- | --- |
| location | 1990 | 2021 | 1990-2021 | 1990-2021 | 1990 | 2021 | 1990-2021 | 1990-2021 |
| Global | 2712.531(-533.456-7054.140) | 3111.499(-633.253-7986.704) | 0.147(0.072-0.225) | 0.23(0.13,0.33) | 0.080(-0.016-0.210) | 0.037(-0.008-0.096) | -0.537(-0.566--0.507) | -2.70(-2.78,-2.61) |
| High SDI | 1228.826(-256.107-3165.642) | 1203.996(-232.207-2988.153) | -0.020(-0.099-0.064) | -0.23(-0.37,-0.10) | 0.111(-0.023-0.286) | 0.052(-0.010-0.131) | -0.528(-0.563--0.489) | -2.60(-2.75,-2.45) |
| High-middle SDI | 817.110(-165.365-2089.146) | 696.184(-149.725-1792.668) | -0.148(-0.253--0.029) | -0.83(-1.05,-0.61) | 0.094(-0.019-0.240) | 0.035(-0.008-0.091) | -0.624(-0.668--0.575) | -3.43(-3.60,-3.26) |
| Middle SDI | 368.351(-72.151-988.389) | 565.480(-118.339-1486.220) | 0.535(0.294-0.797) | 1.08(0.86,1.29) | 0.042(-0.008-0.115) | 0.022(-0.005-0.059) | -0.470(-0.551--0.379) | -2.37(-2.52,-2.22) |
| Low-middle SDI | 188.362(-32.964-509.565) | 410.294(-76.916-1109.409) | 1.178(0.840-1.602) | 2.60(2.54,2.65) | 0.037(-0.007-0.101) | 0.032(-0.006-0.087) | -0.139(-0.270-0.039) | -0.47(-0.51,-0.43) |
| Low SDI | 105.438(-14.323-306.026) | 231.311(-35.455-673.520) | 1.194(0.801-1.707) | 2.53(2.35,2.72) | 0.056(-0.008-0.161) | 0.054(-0.008-0.157) | -0.035(-0.210-0.169) | -0.16(-0.28,-0.04) |
| African Union | 149.340(-21.876-416.999) | 344.113(-60.875-972.879) | 1.304(0.892-1.923) | 2.58(2.42,2.75) | 0.061(-0.009-0.174) | 0.060(-0.011-0.174) | -0.019(-0.189-0.225) | -0.19(-0.28,-0.09) |
| Association of Southeast Asian Nations | 73.797(-14.586-211.300) | 123.655(-25.823-339.657) | 0.676(0.456-1.016) | 1.52(1.37,1.67) | 0.034(-0.007-0.099) | 0.021(-0.004-0.057) | -0.402(-0.474--0.285) | -1.76(-1.85,-1.68) |
| Central Europe, Eastern Europe, and Central Asia | 684.839(-141.077-1761.418) | 571.889(-126.829-1477.128) | -0.165(-0.285--0.042) | -1.01(-1.22,-0.80) | 0.153(-0.031-0.393) | 0.085(-0.019-0.220) | -0.442(-0.520--0.362) | -2.33(-2.51,-2.14) |
| Commonwealth | 447.321(-83.182-1180.832) | 686.008(-130.498-1810.850) | 0.534(0.362-0.754) | 1.35(1.26,1.44) | 0.066(-0.012-0.172) | 0.038(-0.007-0.100) | -0.429(-0.491--0.352) | -1.91(-2.00,-1.82) |
| European Union | 656.138(-138.916-1685.895) | 606.344(-115.898-1506.583) | -0.076(-0.163-0.024) | -0.05(-0.30,0.20) | 0.109(-0.023-0.280) | 0.055(-0.011-0.137) | -0.497(-0.543--0.447) | -2.07(-2.33,-1.80) |
| Four World Regions | 2704.179(-531.750-7032.702) | 3097.629(-630.621-7951.824) | 0.145(0.071-0.224) | 0.23(0.13,0.32) | 0.080(-0.016-0.210) | 0.037(-0.008-0.095) | -0.537(-0.567--0.508) | -2.70(-2.78,-2.62) |
| G20 | 2259.412(-456.536-5854.118) | 2407.885(-489.786-6172.330) | 0.066(-0.008-0.138) | 0.03(-0.05,0.12) | 0.086(-0.017-0.224) | 0.037(-0.008-0.095) | -0.570(-0.597--0.540) | -2.89(-2.97,-2.81) |
| Gulf Cooperation Council | 0.515(-0.102-1.533) | 3.402(-0.654-9.007) | 5.600(3.474-9.178) | 6.97(6.72,7.23) | 0.009(-0.002-0.025) | 0.013(-0.003-0.036) | 0.525(0.054-1.331) | 1.98(1.74,2.23) |
| Health System Grouping Levels | 2708.086(-532.498-7042.783) | 3107.265(-632.308-7975.833) | 0.147(0.073-0.226) | 0.23(0.13,0.33) | 0.080(-0.016-0.210) | 0.037(-0.008-0.095) | -0.537(-0.566--0.507) | -2.70(-2.78,-2.61) |
| High-income | 1262.157(-265.048-3261.160) | 1276.604(-244.858-3171.834) | 0.011(-0.069-0.095) | -0.07(-0.18,0.04) | 0.104(-0.022-0.269) | 0.052(-0.010-0.131) | -0.498(-0.532--0.458) | -2.34(-2.45,-2.22) |
| Latin America and Caribbean | 169.411(-35.197-423.725) | 380.372(-81.959-972.166) | 1.245(0.979-1.512) | 2.35(2.18,2.51) | 0.086(-0.018-0.215) | 0.062(-0.013-0.159) | -0.279(-0.362--0.192) | -1.41(-1.59,-1.22) |
| League of Arab States | 10.520(-1.902-30.848) | 20.049(-3.499-54.528) | 0.906(0.582-1.428) | 1.92(1.60,2.24) | 0.012(-0.002-0.036) | 0.008(-0.001-0.022) | -0.318(-0.429--0.132) | -1.43(-1.68,-1.19) |
| Nordic Region | 88.622(-18.171-233.793) | 47.461(-9.055-119.781) | -0.464(-0.542--0.382) | -1.97(-2.16,-1.79) | 0.219(-0.045-0.572) | 0.071(-0.014-0.181) | -0.674(-0.721--0.624) | -3.53(-3.72,-3.34) |
| North Africa and Middle East | 12.895(-2.388-39.174) | 18.432(-3.398-54.134) | 0.429(0.212-0.799) | 0.97(0.57,1.37) | 0.009(-0.002-0.028) | 0.005(-0.001-0.013) | -0.506(-0.582--0.378) | -2.48(-2.81,-2.15) |
| OECD Countries | 1415.356(-299.152-3644.561) | 1411.442(-272.612-3539.491) | -0.003(-0.079-0.077) | -0.14(-0.25,-0.04) | 0.106(-0.022-0.273) | 0.051(-0.010-0.128) | -0.522(-0.554--0.487) | -2.54(-2.65,-2.43) |
| Organization of Islamic Cooperation | 143.917(-23.454-398.595) | 274.243(-46.819-768.696) | 0.906(0.635-1.353) | 1.97(1.87,2.07) | 0.033(-0.005-0.090) | 0.024(-0.004-0.069) | -0.254(-0.357--0.089) | -1.09(-1.14,-1.03) |
| Sahel Region | 29.587(-3.997-91.501) | 61.209(-8.465-194.072) | 1.069(0.646-1.644) | 2.25(2.05,2.46) | 0.055(-0.007-0.172) | 0.052(-0.007-0.163) | -0.057(-0.244-0.199) | -0.27(-0.38,-0.16) |
| South Asia | 146.856(-26.409-407.390) | 333.487(-62.827-893.289) | 1.271(0.851-1.866) | 2.92(2.81,3.02) | 0.031(-0.006-0.084) | 0.025(-0.005-0.068) | -0.180(-0.336-0.049) | -0.47(-0.56,-0.38) |
| Southeast Asia, East Asia, and Oceania | 293.058(-58.887-833.579) | 194.566(-37.244-561.375) | -0.336(-0.459--0.144) | -1.98(-2.42,-1.53) | 0.030(-0.006-0.087) | 0.007(-0.001-0.020) | -0.763(-0.810--0.690) | -5.19(-5.51,-4.86) |
| Sub-Saharan Africa | 143.317(-20.913-402.974) | 336.150(-59.478-953.428) | 1.346(0.911-1.967) | 2.65(2.50,2.80) | 0.078(-0.011-0.223) | 0.081(-0.014-0.235) | 0.033(-0.154-0.296) | -0.02(-0.10,0.06) |
| WHO region | 2699.545(-530.992-7019.221) | 3092.964(-629.601-7938.569) | 0.146(0.071-0.224) | 0.23(0.13,0.33) | 0.080(-0.016-0.210) | 0.037(-0.008-0.096) | -0.537(-0.566--0.507) | -2.70(-2.78,-2.61) |
| World Bank Regions | 2707.944(-532.470-7042.493) | 3107.154(-632.281-7975.623) | 0.147(0.073-0.226) | 0.23(0.13,0.33) | 0.080(-0.016-0.210) | 0.037(-0.008-0.096) | -0.537(-0.566--0.507) | -2.70(-2.78,-2.62) |

Table 18：Hypertensive heart disease mortality attributable to a diet low in vegetables from 1990 to 2021

|  | Number | | PC | EAPC | Rate | | PC | EAPC |
| --- | --- | --- | --- | --- | --- | --- | --- | --- |
| location | 1990 | 2021 | 1990-2021 | 1990-2021 | 1990 | 2021 | 1990-2021 | 1990-2021 |
| Global | 272519.903(209941.359-338613.099) | 355094.188(271237.945-438713.512) | 0.303(0.123-0.550) | 0.95(0.68,1.22) | 7.874(6.084-9.799) | 4.347(3.313-5.387) | -0.448(-0.519--0.350) | -1.83(-2.02,-1.65) |
| High SDI | 23756.099(18343.492-29706.668) | 57173.706(42111.314-72553.460) | 1.407(1.153-1.658) | 3.77(3.50,4.04) | 2.205(1.703-2.762) | 2.371(1.803-2.968) | 0.075(-0.018-0.179) | 1.06(0.83,1.30) |
| High-middle SDI | 42423.968(32371.476-54553.970) | 38620.073(26721.969-52729.528) | -0.090(-0.267-0.134) | -0.04(-0.38,0.30) | 5.092(3.892-6.538) | 2.104(1.464-2.866) | -0.587(-0.663--0.489) | -2.49(-2.69,-2.30) |
| Middle SDI | 114287.276(80221.373-142483.097) | 101111.175(74199.096-131158.456) | -0.115(-0.281-0.131) | -0.57(-0.98,-0.16) | 14.868(10.550-18.396) | 4.466(3.239-5.822) | -0.700(-0.755--0.615) | -4.01(-4.30,-3.72) |
| Low-middle SDI | 55367.084(38456.318-71890.801) | 97084.008(73481.309-121947.480) | 0.753(0.450-1.277) | 1.83(1.72,1.94) | 11.696(8.347-15.014) | 8.279(6.274-10.339) | -0.292(-0.413--0.097) | -1.14(-1.24,-1.04) |
| Low SDI | 36422.374(23578.468-48153.051) | 60664.865(42379.304-78040.340) | 0.666(0.342-1.215) | 1.58(1.41,1.75) | 20.868(14.139-27.150) | 15.779(11.508-20.011) | -0.244(-0.384--0.019) | -0.97(-1.13,-0.81) |
| African Union | 46745.752(33510.440-60212.146) | 70771.255(49144.237-90015.323) | 0.514(0.240-0.863) | 1.18(1.03,1.33) | 21.195(15.709-26.761) | 14.349(10.147-18.217) | -0.323(-0.453--0.173) | -1.39(-1.49,-1.29) |
| Association of Southeast Asian Nations | 25709.071(17215.660-33927.738) | 43939.785(31480.368-55872.238) | 0.709(0.431-1.177) | 1.61(1.49,1.73) | 12.285(8.296-16.130) | 7.983(5.710-10.167) | -0.350(-0.453--0.175) | -1.49(-1.57,-1.41) |
| Central Europe, Eastern Europe, and Central Asia | 9760.176(7105.586-12832.638) | 15442.924(10825.422-20882.335) | 0.582(0.412-0.755) | 1.64(1.31,1.97) | 2.333(1.705-3.064) | 2.353(1.643-3.181) | 0.009(-0.099-0.126) | 0.14(-0.29,0.58) |
| Commonwealth | 59294.119(42134.446-78450.625) | 116866.838(88995.442-149014.592) | 0.971(0.573-1.670) | 2.22(2.10,2.33) | 8.269(5.936-10.848) | 6.603(5.029-8.398) | -0.202(-0.361-0.058) | -0.76(-0.87,-0.65) |
| European Union | 15023.192(11229.147-19326.697) | 36568.882(26092.368-47727.075) | 1.434(1.062-1.758) | 3.79(3.54,4.04) | 2.579(1.938-3.314) | 2.810(2.019-3.672) | 0.090(-0.056-0.223) | 1.06(0.79,1.33) |
| Four World Regions | 271999.061(209494.813-337992.049) | 354174.658(270479.987-437518.957) | 0.302(0.122-0.549) | 0.95(0.68,1.21) | 7.876(6.085-9.803) | 4.345(3.310-5.384) | -0.448(-0.520--0.350) | -1.84(-2.02,-1.65) |
| G20 | 176193.969(133139.584-218843.648) | 203318.602(154909.262-258913.057) | 0.154(-0.041-0.418) | 0.69(0.31,1.07) | 6.566(4.991-8.152) | 3.212(2.452-4.091) | -0.511(-0.590--0.409) | -2.09(-2.38,-1.81) |
| Gulf Cooperation Council | 1101.522(670.155-1610.663) | 2399.987(1295.215-3763.805) | 1.179(0.435-2.167) | 2.58(2.52,2.63) | 19.727(12.275-28.696) | 11.601(6.648-17.541) | -0.412(-0.604--0.160) | -1.68(-1.79,-1.57) |
| Health System Grouping Levels | 272256.801(209735.413-338277.085) | 354653.826(270895.715-438154.748) | 0.303(0.122-0.550) | 0.95(0.68,1.22) | 7.875(6.085-9.801) | 4.346(3.311-5.385) | -0.448(-0.520--0.350) | -1.84(-2.02,-1.65) |
| High-income | 24492.539(18903.785-30934.270) | 67570.729(49295.678-85725.009) | 1.759(1.448-2.092) | 4.26(4.00,4.51) | 2.091(1.613-2.633) | 2.530(1.898-3.175) | 0.210(0.102-0.341) | 1.48(1.24,1.72) |
| Latin America and Caribbean | 17505.667(14819.864-20291.269) | 28327.163(22626.335-34783.072) | 0.618(0.446-0.775) | 1.76(1.65,1.87) | 9.537(8.065-11.097) | 4.782(3.825-5.868) | -0.499(-0.549--0.451) | -2.10(-2.20,-2.00) |
| League of Arab States | 13845.936(9383.842-18861.522) | 20237.723(12652.518-27888.714) | 0.462(0.130-0.825) | 1.19(0.90,1.48) | 18.003(12.499-24.809) | 10.300(6.564-14.336) | -0.428(-0.565--0.287) | -1.82(-2.05,-1.60) |
| Nordic Region | 360.247(283.676-438.568) | 1429.801(1020.948-1833.102) | 2.969(2.280-3.752) | 5.79(5.31,6.27) | 0.894(0.706-1.087) | 1.905(1.385-2.427) | 1.131(0.787-1.516) | 3.69(3.24,4.15) |
| North Africa and Middle East | 18943.948(12690.695-26059.831) | 25420.900(16282.954-35545.304) | 0.342(0.064-0.674) | 0.98(0.72,1.23) | 15.028(10.267-20.775) | 7.273(4.701-10.113) | -0.516(-0.616--0.396) | -2.39(-2.61,-2.16) |
| OECD Countries | 28284.257(21749.520-35980.956) | 73915.834(54135.672-93604.600) | 1.613(1.320-1.915) | 4.01(3.76,4.26) | 2.181(1.677-2.767) | 2.439(1.817-3.079) | 0.118(0.018-0.241) | 1.14(0.93,1.36) |
| Organization of Islamic Cooperation | 54257.260(38397.315-70341.615) | 84495.321(60022.330-107088.594) | 0.557(0.263-0.911) | 1.25(1.14,1.36) | 13.089(9.439-16.885) | 8.591(6.280-10.958) | -0.344(-0.470--0.195) | -1.56(-1.67,-1.45) |
| Sahel Region | 10754.462(6945.365-14299.822) | 15025.110(9413.753-20044.848) | 0.397(0.009-0.799) | 0.80(0.60,1.01) | 20.398(13.717-26.933) | 13.163(8.570-17.509) | -0.355(-0.529--0.178) | -1.70(-1.86,-1.54) |
| South Asia | 37769.945(24267.340-52737.956) | 84093.688(60442.271-114486.964) | 1.226(0.664-2.301) | 2.72(2.59,2.86) | 8.836(5.809-12.308) | 7.130(5.161-9.644) | -0.193(-0.395-0.188) | -0.65(-0.80,-0.49) |
| Southeast Asia, East Asia, and Oceania | 126150.819(85617.804-161938.210) | 73635.206(49402.961-101591.145) | -0.416(-0.554--0.225) | -2.12(-2.66,-1.58) | 15.601(10.512-19.780) | 3.072(2.015-4.353) | -0.803(-0.852--0.733) | -5.49(-5.86,-5.11) |
| Sub-Saharan Africa | 37896.810(26522.488-48584.370) | 60603.577(42575.683-76985.765) | 0.599(0.315-0.995) | 1.31(1.17,1.44) | 22.300(16.153-28.172) | 16.487(11.657-20.807) | -0.261(-0.402--0.088) | -1.18(-1.28,-1.08) |
| WHO region | 271088.664(208665.186-336876.814) | 352678.929(269029.288-435572.429) | 0.301(0.121-0.549) | 0.94(0.68,1.21) | 7.877(6.084-9.805) | 4.350(3.313-5.390) | -0.448(-0.519--0.349) | -1.84(-2.02,-1.65) |
| World Bank Regions | 272190.329(209695.219-338191.132) | 354581.230(270853.257-438036.273) | 0.303(0.122-0.550) | 0.95(0.68,1.22) | 7.877(6.087-9.802) | 4.346(3.312-5.385) | -0.448(-0.520--0.350) | -1.84(-2.02,-1.65) |

Table 19：Hypertensive heart disease DALY attributable to a diet low in vegetables from 1990 to 2021

|  | Number | | PC | EAPC | Rate | | PC | EAPC |
| --- | --- | --- | --- | --- | --- | --- | --- | --- |
| location | 1990 | 2021 | 1990-2021 | 1990-2021 | 1990 | 2021 | 1990-2021 | 1990-2021 |
| Global | 6200805.437(4721338.371-7686825.769) | 7247823.693(5557189.280-8968280.534) | 0.169(0.015-0.403) | 0.53(0.28,0.79) | 160.749(123.308-199.044) | 85.787(65.592-106.107) | -0.466(-0.534--0.368) | -2.00(-2.22,-1.79) |
| High SDI | 451197.347(350694.546-564119.488) | 972785.241(758394.423-1205535.322) | 1.156(0.969-1.355) | 3.48(3.19,3.76) | 42.002(32.790-52.463) | 48.842(38.388-60.589) | 0.163(0.064-0.274) | 1.41(1.15,1.68) |
| High-middle SDI | 885107.310(681347.092-1137787.486) | 568591.332(398261.023-764940.988) | -0.358(-0.476--0.212) | -1.39(-1.72,-1.06) | 95.187(73.311-122.398) | 30.356(21.223-40.913) | -0.681(-0.736--0.614) | -3.53(-3.76,-3.31) |
| Middle SDI | 2590575.806(1831981.717-3236092.146) | 2074517.757(1560483.694-2626962.976) | -0.199(-0.335-0.013) | -0.91(-1.31,-0.51) | 276.123(195.799-342.750) | 82.037(61.717-104.734) | -0.703(-0.752--0.622) | -4.08(-4.42,-3.74) |
| Low-middle SDI | 1342614.012(917894.815-1752382.727) | 2153827.767(1622471.721-2689606.738) | 0.604(0.336-1.109) | 1.50(1.40,1.60) | 231.896(162.234-300.619) | 157.687(119.668-196.331) | -0.320(-0.436--0.121) | -1.31(-1.39,-1.22) |
| Low SDI | 925458.672(585938.561-1229281.687) | 1469422.604(1009176.148-1909931.676) | 0.588(0.274-1.128) | 1.36(1.20,1.53) | 427.719(280.535-561.750) | 303.624(213.787-390.648) | -0.290(-0.424--0.071) | -1.24(-1.38,-1.11) |
| African Union | 1160212.415(805443.665-1503868.428) | 1718349.240(1195117.931-2182877.581) | 0.481(0.221-0.827) | 1.08(0.94,1.22) | 425.857(305.344-547.615) | 273.759(191.611-346.829) | -0.357(-0.470--0.214) | -1.59(-1.69,-1.49) |
| Association of Southeast Asian Nations | 667980.646(444935.363-882891.101) | 1077841.794(753602.643-1364102.270) | 0.614(0.342-1.105) | 1.44(1.34,1.54) | 269.273(181.342-355.110) | 170.653(121.762-216.518) | -0.366(-0.468--0.187) | -1.58(-1.66,-1.49) |
| Central Europe, Eastern Europe, and Central Asia | 204994.472(148767.845-269795.569) | 249711.667(176795.992-336739.035) | 0.218(0.108-0.342) | 0.49(0.06,0.91) | 45.652(33.133-59.984) | 38.767(27.469-52.281) | -0.151(-0.229--0.065) | -0.67(-1.16,-0.19) |
| Commonwealth | 1444909.859(1008769.550-1911744.231) | 2594050.547(1970879.243-3302103.876) | 0.795(0.443-1.438) | 1.86(1.76,1.95) | 171.389(121.876-225.878) | 129.939(98.728-164.985) | -0.242(-0.387-0.022) | -0.98(-1.07,-0.89) |
| European Union | 247980.856(186222.554-319340.445) | 448579.001(328141.616-587260.404) | 0.809(0.580-1.012) | 2.73(2.50,2.96) | 42.339(31.836-54.523) | 38.410(28.216-50.496) | -0.093(-0.185--0.008) | 0.37(0.16,0.59) |
| Four World Regions | 6189211.677(4711260.789-7674249.498) | 7231073.163(5544072.056-8948657.833) | 0.168(0.014-0.403) | 0.53(0.28,0.79) | 160.790(123.316-199.120) | 85.744(65.546-106.070) | -0.467(-0.535--0.368) | -2.01(-2.22,-1.80) |
| G20 | 3919092.570(2940516.932-4909711.518) | 3849439.947(2927838.817-4870782.094) | -0.018(-0.167-0.233) | 0.10(-0.28,0.48) | 132.534(100.138-165.395) | 60.594(46.239-76.557) | -0.543(-0.610--0.433) | -2.37(-2.69,-2.04) |
| Gulf Cooperation Council | 24894.697(15081.388-37412.463) | 71981.892(38313.566-116308.434) | 1.891(0.843-3.308) | 3.68(3.59,3.76) | 342.057(208.035-500.727) | 216.654(123.442-333.010) | -0.367(-0.573--0.096) | -1.35(-1.49,-1.21) |
| Health System Grouping Levels | 6194953.148(4716453.546-7680065.036) | 7239144.702(5550566.620-8957660.143) | 0.169(0.014-0.403) | 0.53(0.28,0.79) | 160.778(123.328-199.077) | 85.761(65.570-106.078) | -0.467(-0.535--0.368) | -2.01(-2.22,-1.79) |
| High-income | 444045.826(343202.775-551738.299) | 1044973.558(810568.538-1301262.311) | 1.353(1.142-1.594) | 3.77(3.50,4.04) | 38.324(29.617-47.676) | 48.265(38.420-59.733) | 0.259(0.151-0.389) | 1.68(1.42,1.93) |
| Latin America and Caribbean | 387934.410(328563.270-446554.864) | 548095.614(446070.270-672146.501) | 0.413(0.276-0.554) | 1.22(1.11,1.33) | 182.220(154.724-210.812) | 89.632(72.981-109.942) | -0.508(-0.555--0.461) | -2.24(-2.35,-2.12) |
| League of Arab States | 314572.774(205448.409-437260.667) | 454661.208(287610.689-624895.279) | 0.445(0.113-0.831) | 1.12(0.84,1.41) | 326.942(221.821-445.717) | 178.388(113.757-245.192) | -0.454(-0.574--0.317) | -2.01(-2.24,-1.79) |
| Nordic Region | 5704.381(4510.363-6889.222) | 17764.764(13495.974-22411.191) | 2.114(1.658-2.607) | 4.98(4.51,5.45) | 14.891(11.875-17.858) | 26.400(20.426-33.056) | 0.773(0.554-1.013) | 3.10(2.66,3.55) |
| North Africa and Middle East | 425579.226(278772.001-590406.351) | 545946.860(346303.426-760565.088) | 0.283(0.007-0.612) | 0.73(0.47,0.99) | 275.740(185.315-378.958) | 128.241(82.797-177.925) | -0.535(-0.631--0.421) | -2.57(-2.79,-2.35) |
| OECD Countries | 518116.913(399483.083-649170.949) | 1148719.024(890429.272-1437858.049) | 1.217(1.021-1.451) | 3.48(3.23,3.74) | 39.789(30.654-49.798) | 45.108(35.647-56.315) | 0.134(0.037-0.251) | 1.23(1.00,1.46) |
| Organization of Islamic Cooperation | 1301941.183(901011.182-1696436.376) | 1983526.712(1379705.007-2519774.929) | 0.524(0.242-0.880) | 1.17(1.07,1.27) | 261.438(184.372-339.062) | 162.748(115.904-206.045) | -0.377(-0.492--0.237) | -1.74(-1.85,-1.64) |
| Sahel Region | 275915.520(175311.257-369780.184) | 401930.944(247901.065-533791.528) | 0.457(0.054-0.905) | 0.95(0.75,1.16) | 433.847(282.260-576.168) | 273.778(172.948-363.579) | -0.369(-0.536--0.192) | -1.77(-1.92,-1.61) |
| South Asia | 923422.171(589024.891-1299664.885) | 1814049.064(1296393.008-2469538.694) | 0.964(0.470-1.925) | 2.26(2.15,2.37) | 172.440(112.206-240.526) | 131.765(94.586-178.846) | -0.236(-0.428-0.126) | -0.87(-0.98,-0.76) |
| Southeast Asia, East Asia, and Oceania | 2852403.261(1937457.642-3674703.501) | 1533194.710(1034268.133-2022504.050) | -0.462(-0.565--0.309) | -2.36(-2.90,-1.81) | 285.128(194.123-362.523) | 57.879(39.041-77.567) | -0.797(-0.836--0.739) | -5.42(-5.88,-4.95) |
| Sub-Saharan Africa | 962426.069(659750.824-1251020.730) | 1511852.220(1059393.549-1926932.295) | 0.571(0.285-0.958) | 1.23(1.10,1.36) | 463.210(324.907-594.384) | 322.824(229.096-407.551) | -0.303(-0.425--0.135) | -1.39(-1.49,-1.28) |
| WHO region | 6169915.459(4694522.543-7652685.956) | 7208156.646(5524665.126-8923760.055) | 0.168(0.014-0.403) | 0.53(0.27,0.78) | 160.896(123.355-199.259) | 85.889(65.691-106.281) | -0.466(-0.534--0.367) | -2.01(-2.22,-1.80) |
| World Bank Regions | 6193872.498(4715492.241-7678774.313) | 7238051.434(5549908.899-8956234.031) | 0.169(0.014-0.403) | 0.53(0.28,0.79) | 160.824(123.362-199.129) | 85.777(65.584-106.094) | -0.467(-0.535--0.368) | -2.01(-2.22,-1.79) |

Table 20：Aortic aneurysm mortality attributable to a diet low in vegetables from 1990 to 2021

|  | Number | | PC | EAPC | Rate | | PC | EAPC |
| --- | --- | --- | --- | --- | --- | --- | --- | --- |
| location | 1990 | 2021 | 1990-2021 | 1990-2021 | 1990 | 2021 | 1990-2021 | 1990-2021 |
| Global | 3116.189(2083.812-4402.195) | 4414.547(2966.388-6305.973) | 0.417(0.317-0.503) | 0.80(0.64,0.96) | 0.090(0.060-0.127) | 0.053(0.036-0.076) | -0.410(-0.452--0.375) | -2.04(-2.18,-1.91) |
| High SDI | 1910.122(1265.825-2750.159) | 1557.978(1021.727-2273.790) | -0.184(-0.268--0.111) | -1.13(-1.30,-0.97) | 0.168(0.111-0.242) | 0.066(0.044-0.097) | -0.605(-0.638--0.575) | -3.46(-3.63,-3.29) |
| High-middle SDI | 462.846(294.914-674.672) | 759.237(489.850-1113.791) | 0.640(0.496-0.775) | 1.43(1.25,1.62) | 0.051(0.032-0.074) | 0.039(0.025-0.057) | -0.237(-0.300--0.178) | -1.07(-1.23,-0.91) |
| Middle SDI | 390.397(264.145-541.263) | 1026.730(697.401-1466.058) | 1.630(1.318-1.948) | 2.78(2.65,2.91) | 0.045(0.031-0.063) | 0.042(0.028-0.059) | -0.083(-0.188-0.026) | -0.66(-0.81,-0.51) |
| Low-middle SDI | 218.290(133.580-345.888) | 744.981(479.604-1142.133) | 2.413(1.768-3.066) | 4.04(3.96,4.12) | 0.042(0.026-0.066) | 0.058(0.037-0.088) | 0.382(0.131-0.635) | 1.01(0.94,1.08) |
| Low SDI | 129.902(70.672-240.395) | 320.556(165.126-549.280) | 1.468(0.985-2.060) | 2.86(2.65,3.08) | 0.069(0.037-0.125) | 0.073(0.038-0.125) | 0.068(-0.136-0.304) | 0.12(-0.05,0.29) |
| African Union | 207.627(114.326-354.924) | 444.141(219.726-775.225) | 1.139(0.746-1.543) | 2.12(1.93,2.32) | 0.089(0.049-0.151) | 0.080(0.040-0.138) | -0.100(-0.252-0.052) | -0.68(-0.84,-0.52) |
| Association of Southeast Asian Nations | 104.260(65.782-153.416) | 332.664(220.461-478.962) | 2.191(1.490-3.058) | 3.60(3.52,3.68) | 0.054(0.034-0.080) | 0.064(0.043-0.093) | 0.203(-0.050-0.517) | 0.41(0.35,0.47) |
| Central Europe, Eastern Europe, and Central Asia | 334.230(213.682-484.824) | 526.228(336.274-775.717) | 0.574(0.433-0.710) | 1.21(0.89,1.53) | 0.073(0.047-0.105) | 0.080(0.051-0.119) | 0.102(0.001-0.193) | 0.02(-0.26,0.30) |
| Commonwealth | 916.447(615.481-1271.968) | 1283.295(839.396-1915.840) | 0.400(0.232-0.589) | 0.68(0.43,0.93) | 0.136(0.092-0.190) | 0.071(0.046-0.104) | -0.481(-0.542--0.410) | -2.57(-2.80,-2.34) |
| European Union | 738.739(478.665-1070.689) | 703.358(461.783-1013.698) | -0.048(-0.129-0.023) | -0.51(-0.65,-0.37) | 0.120(0.078-0.174) | 0.066(0.043-0.095) | -0.453(-0.493--0.417) | -2.35(-2.51,-2.18) |
| Four World Regions | 3106.770(2077.509-4389.139) | 4404.940(2959.398-6292.844) | 0.418(0.318-0.504) | 0.80(0.65,0.96) | 0.090(0.060-0.127) | 0.053(0.036-0.076) | -0.410(-0.451--0.374) | -2.04(-2.18,-1.90) |
| G20 | 2546.819(1679.848-3655.411) | 3214.788(2137.127-4653.679) | 0.262(0.174-0.343) | 0.46(0.31,0.61) | 0.095(0.063-0.136) | 0.050(0.033-0.072) | -0.474(-0.509--0.441) | -2.38(-2.51,-2.24) |
| Gulf Cooperation Council | 0.269(0.148-0.430) | 2.888(1.697-4.515) | 9.746(6.385-13.978) | 9.66(8.99,10.33) | 0.004(0.002-0.006) | 0.010(0.006-0.015) | 1.707(0.918-2.758) | 4.74(4.14,5.34) |
| Health System Grouping Levels | 3111.557(2080.765-4395.604) | 4409.482(2962.915-6298.798) | 0.417(0.318-0.504) | 0.80(0.64,0.96) | 0.090(0.060-0.127) | 0.053(0.036-0.076) | -0.410(-0.452--0.375) | -2.04(-2.18,-1.91) |
| High-income | 1970.323(1301.567-2846.964) | 1683.229(1105.756-2454.099) | -0.146(-0.228--0.075) | -0.93(-1.09,-0.78) | 0.159(0.105-0.229) | 0.068(0.045-0.099) | -0.571(-0.605--0.541) | -3.14(-3.31,-2.98) |
| Latin America and Caribbean | 248.607(170.367-341.567) | 671.134(458.105-925.747) | 1.700(1.481-1.904) | 2.85(2.68,3.03) | 0.120(0.082-0.165) | 0.111(0.076-0.153) | -0.077(-0.148--0.011) | -0.70(-0.87,-0.53) |
| League of Arab States | 7.646(4.519-11.908) | 27.379(16.227-40.825) | 2.581(1.787-3.562) | 4.29(4.12,4.46) | 0.008(0.005-0.012) | 0.011(0.007-0.016) | 0.370(0.076-0.715) | 1.12(0.99,1.25) |
| Nordic Region | 146.325(98.891-205.000) | 97.847(64.352-142.207) | -0.331(-0.403--0.254) | -1.86(-2.06,-1.65) | 0.363(0.246-0.506) | 0.149(0.098-0.218) | -0.588(-0.628--0.542) | -3.35(-3.59,-3.11) |
| North Africa and Middle East | 7.770(4.096-13.045) | 27.044(16.383-41.486) | 2.481(1.595-3.539) | 4.52(4.24,4.81) | 0.005(0.003-0.009) | 0.006(0.004-0.010) | 0.265(-0.053-0.647) | 1.14(0.89,1.39) |
| OECD Countries | 2035.047(1341.429-2946.880) | 1818.981(1197.726-2651.273) | -0.106(-0.188--0.037) | -0.81(-0.97,-0.66) | 0.148(0.098-0.214) | 0.065(0.043-0.094) | -0.564(-0.596--0.535) | -3.14(-3.30,-2.97) |
| Organization of Islamic Cooperation | 185.288(112.700-287.974) | 522.082(317.381-802.301) | 1.818(1.251-2.406) | 3.16(3.03,3.30) | 0.042(0.026-0.066) | 0.049(0.030-0.076) | 0.161(-0.072-0.388) | 0.22(0.11,0.33) |
| Sahel Region | 41.358(20.715-83.846) | 89.198(38.389-173.673) | 1.157(0.550-1.785) | 2.30(2.08,2.52) | 0.077(0.038-0.155) | 0.077(0.033-0.149) | 0.000(-0.281-0.283) | -0.18(-0.33,-0.03) |
| South Asia | 163.634(85.770-294.882) | 683.344(412.443-1105.816) | 3.176(2.101-4.754) | 4.87(4.76,4.97) | 0.033(0.017-0.059) | 0.052(0.031-0.083) | 0.547(0.144-1.143) | 1.51(1.40,1.62) |
| Southeast Asia, East Asia, and Oceania | 187.090(115.907-270.131) | 390.254(253.061-573.309) | 1.086(0.610-1.640) | 2.12(1.93,2.31) | 0.021(0.013-0.030) | 0.015(0.010-0.023) | -0.266(-0.428--0.083) | -1.26(-1.35,-1.17) |
| Sub-Saharan Africa | 204.535(112.344-351.646) | 433.313(212.151-761.615) | 1.119(0.721-1.522) | 2.08(1.88,2.27) | 0.117(0.065-0.200) | 0.107(0.053-0.187) | -0.081(-0.238-0.076) | -0.64(-0.80,-0.47) |
| WHO region | 3099.929(2073.031-4379.090) | 4387.517(2949.296-6267.476) | 0.415(0.315-0.502) | 0.80(0.64,0.96) | 0.090(0.060-0.127) | 0.053(0.036-0.076) | -0.410(-0.452--0.374) | -2.04(-2.18,-1.90) |
| World Bank Regions | 3111.187(2080.568-4395.025) | 4408.956(2962.626-6297.705) | 0.417(0.318-0.504) | 0.80(0.64,0.96) | 0.090(0.060-0.127) | 0.053(0.036-0.076) | -0.410(-0.452--0.375) | -2.04(-2.18,-1.91) |

Table 21：Aortic aneurysm DALY attributable to a diet low in vegetables from 1990 to 2021

|  | Number | | PC | EAPC | Rate | | PC | EAPC |
| --- | --- | --- | --- | --- | --- | --- | --- | --- |
| location | 1990 | 2021 | 1990-2021 | 1990-2021 | 1990 | 2021 | 1990-2021 | 1990-2021 |
| Global | 64985.903(43351.278-91246.309) | 90874.537(60917.926-129167.044) | 0.398(0.285-0.502) | 0.77(0.61,0.92) | 1.700(1.137-2.391) | 1.064(0.713-1.512) | -0.374(-0.425--0.329) | -1.85(-1.99,-1.71) |
| High SDI | 35456.899(23441.691-50944.842) | 25882.590(16940.053-37742.646) | -0.270(-0.327--0.220) | -1.46(-1.62,-1.30) | 3.152(2.084-4.525) | 1.253(0.823-1.819) | -0.602(-0.628--0.578) | -3.40(-3.56,-3.24) |
| High-middle SDI | 10765.922(6855.002-15657.981) | 15968.013(10249.560-23707.955) | 0.483(0.348-0.616) | 1.07(0.87,1.27) | 1.088(0.694-1.581) | 0.819(0.526-1.215) | -0.247(-0.315--0.184) | -1.13(-1.30,-0.96) |
| Middle SDI | 9935.646(6686.374-13691.337) | 23160.265(15661.321-32728.417) | 1.331(1.039-1.636) | 2.34(2.20,2.47) | 0.953(0.646-1.325) | 0.869(0.589-1.231) | -0.088(-0.200-0.025) | -0.73(-0.88,-0.58) |
| Low-middle SDI | 5428.830(3319.551-8663.647) | 17561.927(11391.826-27243.095) | 2.235(1.603-2.899) | 3.84(3.77,3.91) | 0.890(0.545-1.412) | 1.216(0.789-1.868) | 0.366(0.106-0.634) | 0.95(0.89,1.01) |
| Low SDI | 3300.663(1791.822-6145.267) | 8201.209(4225.559-14073.513) | 1.485(0.976-2.140) | 2.85(2.63,3.06) | 1.459(0.793-2.698) | 1.562(0.804-2.676) | 0.071(-0.140-0.330) | 0.08(-0.08,0.24) |
| African Union | 5129.956(2817.126-8886.166) | 11370.411(5495.915-20323.742) | 1.216(0.781-1.681) | 2.25(2.07,2.43) | 1.819(1.003-3.124) | 1.680(0.826-2.946) | -0.077(-0.245-0.100) | -0.59(-0.74,-0.44) |
| Association of Southeast Asian Nations | 2400.921(1509.662-3480.449) | 7027.957(4627.944-10185.334) | 1.927(1.235-2.775) | 3.30(3.22,3.39) | 1.025(0.645-1.506) | 1.189(0.781-1.713) | 0.159(-0.102-0.489) | 0.29(0.23,0.36) |
| Central Europe, Eastern Europe, and Central Asia | 8039.302(5138.784-11680.983) | 11535.171(7271.730-17083.638) | 0.435(0.296-0.562) | 0.85(0.56,1.14) | 1.696(1.087-2.458) | 1.818(1.152-2.696) | 0.072(-0.028-0.166) | -0.08(-0.33,0.18) |
| Commonwealth | 18323.945(12164.966-25641.457) | 28041.054(18099.557-42621.210) | 0.530(0.329-0.747) | 1.03(0.80,1.27) | 2.368(1.583-3.279) | 1.386(0.900-2.095) | -0.415(-0.490--0.332) | -2.15(-2.37,-1.92) |
| European Union | 14160.120(9171.587-20488.044) | 12012.933(7855.961-17327.134) | -0.152(-0.214--0.095) | -0.91(-1.07,-0.75) | 2.360(1.532-3.414) | 1.284(0.836-1.854) | -0.456(-0.492--0.419) | -2.36(-2.53,-2.19) |
| Four World Regions | 64791.394(43215.665-90975.382) | 90694.620(60797.668-128910.604) | 0.400(0.286-0.503) | 0.77(0.61,0.93) | 1.699(1.136-2.389) | 1.064(0.712-1.512) | -0.374(-0.425--0.329) | -1.85(-1.99,-1.71) |
| G20 | 51718.039(34107.187-73481.899) | 63599.247(42082.951-91457.932) | 0.230(0.151-0.303) | 0.40(0.26,0.55) | 1.763(1.166-2.512) | 0.988(0.654-1.421) | -0.439(-0.474--0.406) | -2.15(-2.28,-2.01) |
| Gulf Cooperation Council | 8.287(4.450-13.620) | 98.392(57.075-155.279) | 10.872(7.039-15.884) | 10.25(9.49,11.02) | 0.082(0.044-0.131) | 0.224(0.131-0.352) | 1.747(0.889-2.898) | 4.97(4.30,5.65) |
| Health System Grouping Levels | 64887.960(43285.956-91106.452) | 90774.005(60851.788-129022.378) | 0.399(0.285-0.503) | 0.77(0.61,0.93) | 1.700(1.137-2.390) | 1.064(0.712-1.512) | -0.374(-0.425--0.329) | -1.85(-1.99,-1.71) |
| High-income | 36374.627(23949.311-52393.628) | 27994.555(18355.256-40827.983) | -0.230(-0.289--0.181) | -1.24(-1.38,-1.09) | 2.982(1.963-4.289) | 1.313(0.860-1.910) | -0.560(-0.586--0.534) | -3.01(-3.16,-2.86) |
| Latin America and Caribbean | 6299.079(4308.940-8603.449) | 15269.352(10445.463-21020.310) | 1.424(1.248-1.605) | 2.45(2.28,2.62) | 2.729(1.870-3.733) | 2.443(1.670-3.365) | -0.105(-0.169--0.040) | -0.84(-1.02,-0.67) |
| League of Arab States | 212.325(125.189-332.112) | 754.093(445.829-1125.375) | 2.552(1.710-3.581) | 4.27(4.12,4.42) | 0.186(0.110-0.289) | 0.244(0.145-0.364) | 0.313(0.018-0.674) | 0.95(0.84,1.06) |
| Nordic Region | 2763.189(1874.084-3849.523) | 1540.038(1016.874-2213.788) | -0.443(-0.494--0.383) | -2.43(-2.63,-2.23) | 7.326(4.977-10.177) | 2.611(1.726-3.734) | -0.644(-0.673--0.610) | -3.83(-4.07,-3.58) |
| North Africa and Middle East | 215.731(113.702-365.178) | 733.874(443.831-1119.274) | 2.402(1.487-3.476) | 4.40(4.13,4.67) | 0.118(0.062-0.198) | 0.148(0.089-0.225) | 0.248(-0.077-0.627) | 1.04(0.80,1.28) |
| OECD Countries | 37932.786(24926.714-54722.227) | 30762.520(20131.512-44758.935) | -0.189(-0.244--0.139) | -1.11(-1.26,-0.96) | 2.787(1.831-4.017) | 1.240(0.812-1.794) | -0.555(-0.580--0.529) | -3.04(-3.19,-2.88) |
| Organization of Islamic Cooperation | 4398.558(2680.833-6898.205) | 12313.954(7321.302-18968.486) | 1.800(1.227-2.413) | 3.14(3.01,3.27) | 0.866(0.527-1.350) | 0.980(0.592-1.497) | 0.132(-0.097-0.369) | 0.15(0.04,0.25) |
| Sahel Region | 984.493(495.645-1993.971) | 2257.522(972.764-4394.822) | 1.293(0.640-2.004) | 2.51(2.26,2.75) | 1.560(0.783-3.170) | 1.563(0.672-3.046) | 0.002(-0.284-0.291) | -0.19(-0.34,-0.04) |
| South Asia | 4196.943(2195.298-7574.121) | 15890.732(9535.181-26381.222) | 2.786(1.799-4.250) | 4.47(4.39,4.55) | 0.723(0.380-1.308) | 1.075(0.647-1.772) | 0.488(0.104-1.055) | 1.32(1.25,1.40) |
| Southeast Asia, East Asia, and Oceania | 4815.704(2955.744-6866.808) | 8359.038(5432.061-12428.210) | 0.736(0.309-1.244) | 1.48(1.26,1.70) | 0.431(0.266-0.619) | 0.308(0.200-0.458) | -0.285(-0.456--0.081) | -1.38(-1.54,-1.22) |
| Sub-Saharan Africa | 5044.517(2760.945-8788.689) | 11091.814(5300.527-19963.279) | 1.199(0.756-1.659) | 2.21(2.03,2.40) | 2.391(1.314-4.125) | 2.242(1.092-3.960) | -0.062(-0.237-0.115) | -0.55(-0.70,-0.41) |
| WHO region | 64601.813(43091.403-90697.408) | 90334.321(60580.194-128354.105) | 0.398(0.285-0.501) | 0.77(0.61,0.93) | 1.701(1.137-2.392) | 1.065(0.713-1.513) | -0.374(-0.425--0.329) | -1.84(-1.99,-1.70) |
| World Bank Regions | 64880.952(43282.210-91095.032) | 90764.184(60846.747-129003.900) | 0.399(0.285-0.502) | 0.77(0.61,0.93) | 1.700(1.137-2.391) | 1.064(0.713-1.512) | -0.374(-0.425--0.329) | -1.85(-1.99,-1.71) |

Fig 1：Global cardiovascular disease attributable to a diet low in vegetables across 204 countries from 1990 to 2021.（A）Global cardiovascular disease death number attributable to a diet low in vegetables from 1990 to 2021.（B）Global cardiovascular disease death rate attributable to a diet low in vegetables from 1990 to 2021.（C）Global cardiovascular disease DALY number attributable to a diet low in vegetables from 1990 to 2021.（D）Global cardiovascular disease DALY rate attributable to a diet low in vegetables from 1990 to 2021.


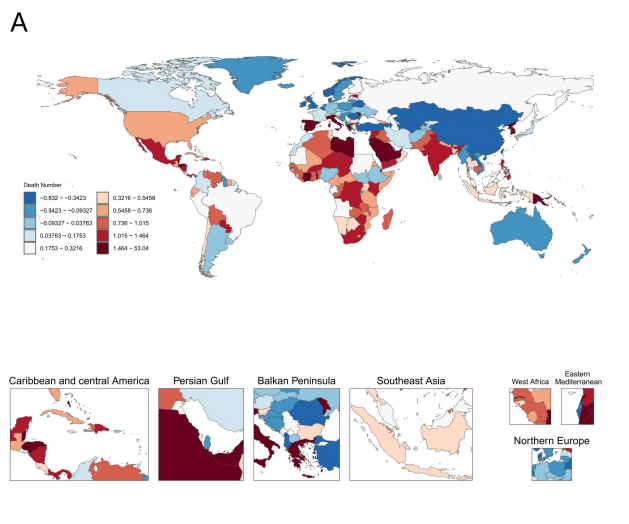

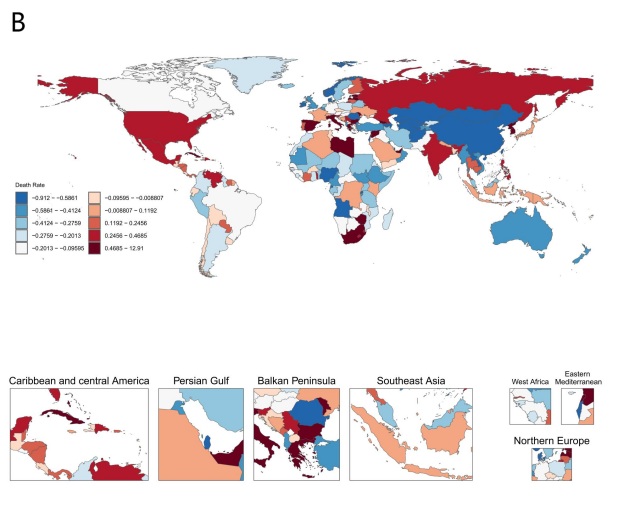

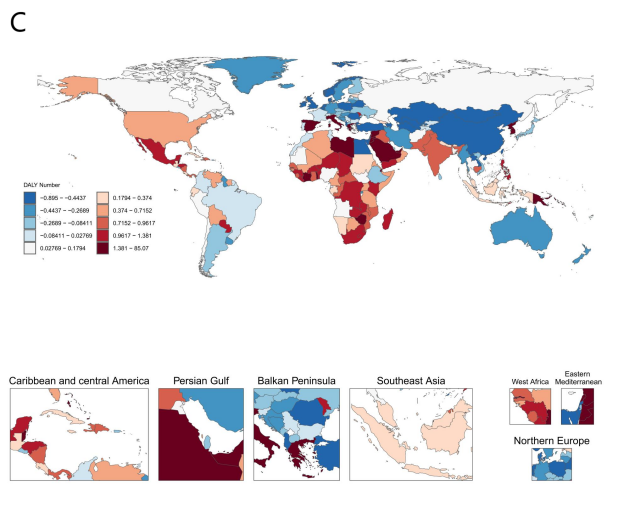

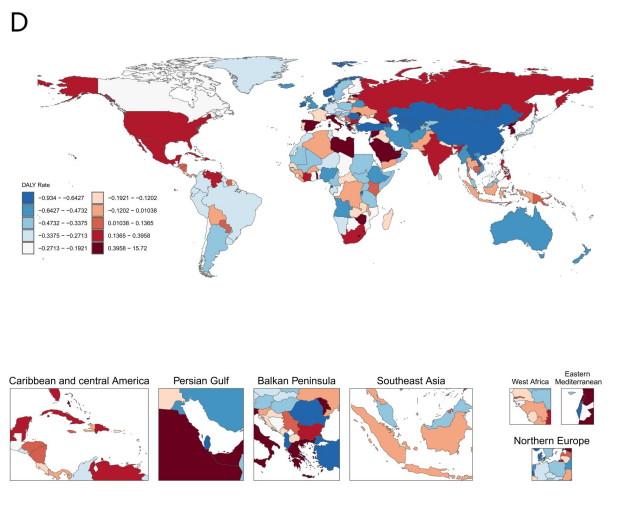


Fig 2：Cardiovascular disease attributable to a diet low in vegetables in age groups 20-54 and ≥55 years from 1990 to 2021.（A）Cardiovascular disease DALY attributable to a diet low in vegetables in age groups 20-54 and ≥55 years from 1990 to 2021.（B）Cardiovascular disease YLL attributable to a diet low in vegetables in age groups 20-54 and ≥55 years from 1990 to 2021.


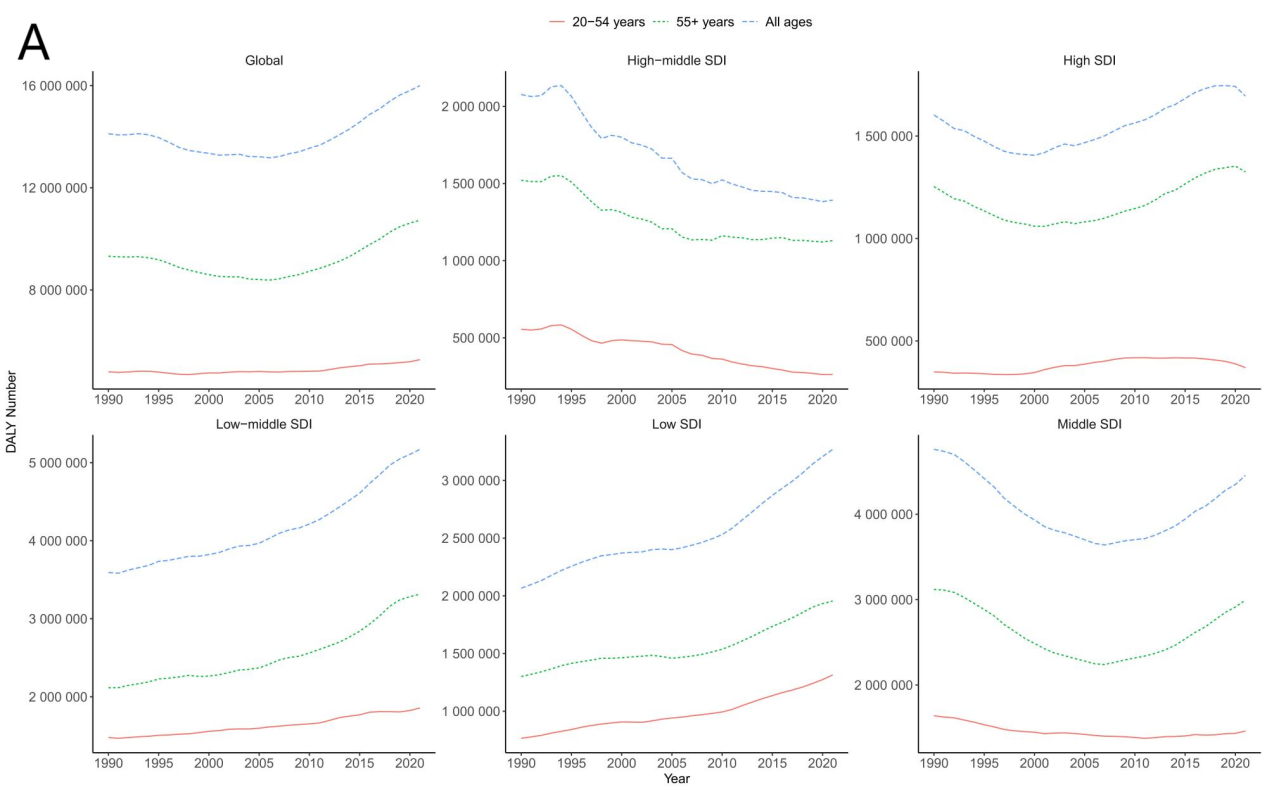

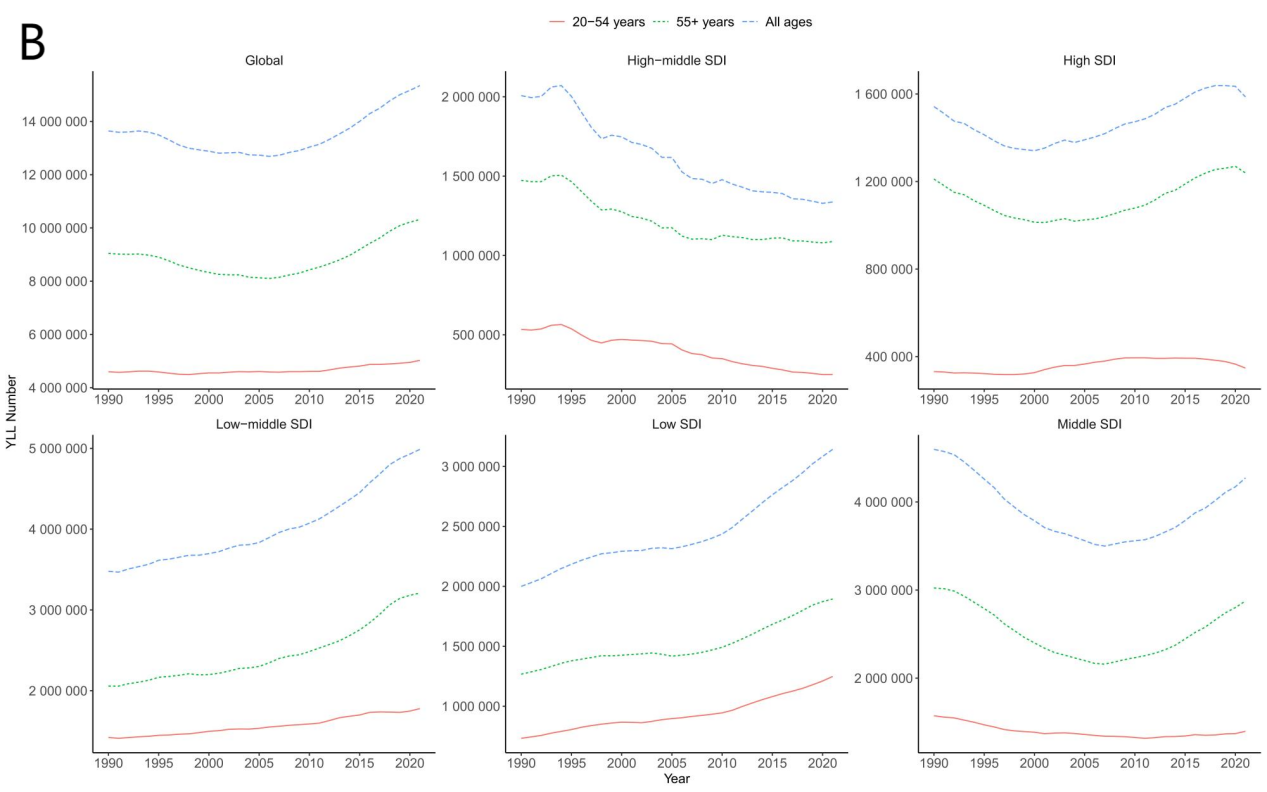


Fig 3：Cardiovascular disease attributable to a diet low in vegetables by SDI region from 1990 to 2021.（A）Cardiovascular disease DALY attributable to a diet low in vegetables by SDI region from 1990 to 2021.（B）Cardiovascular disease YLL attributable to a diet low in vegetables by SDI region from 1990 to 2021.


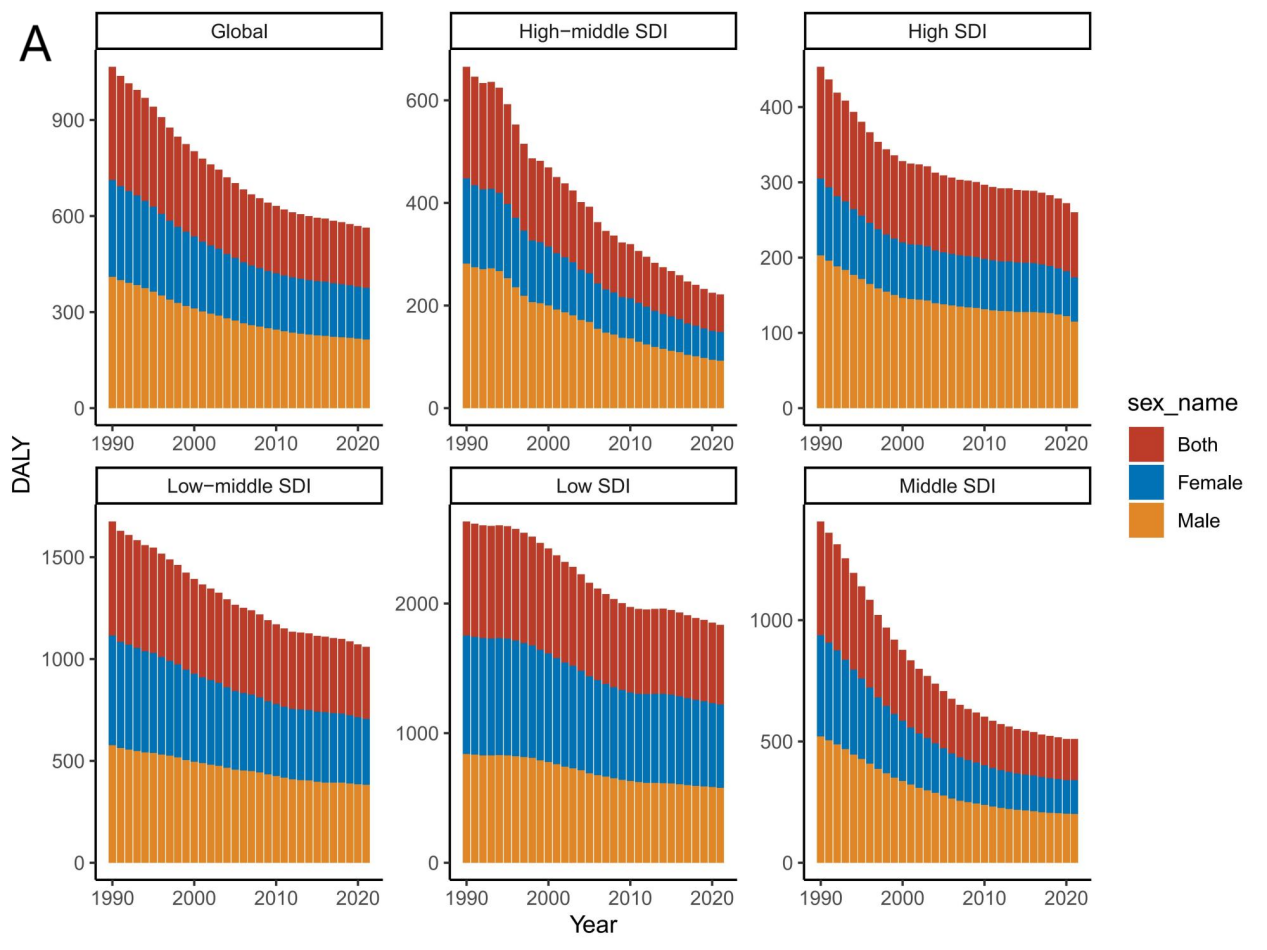

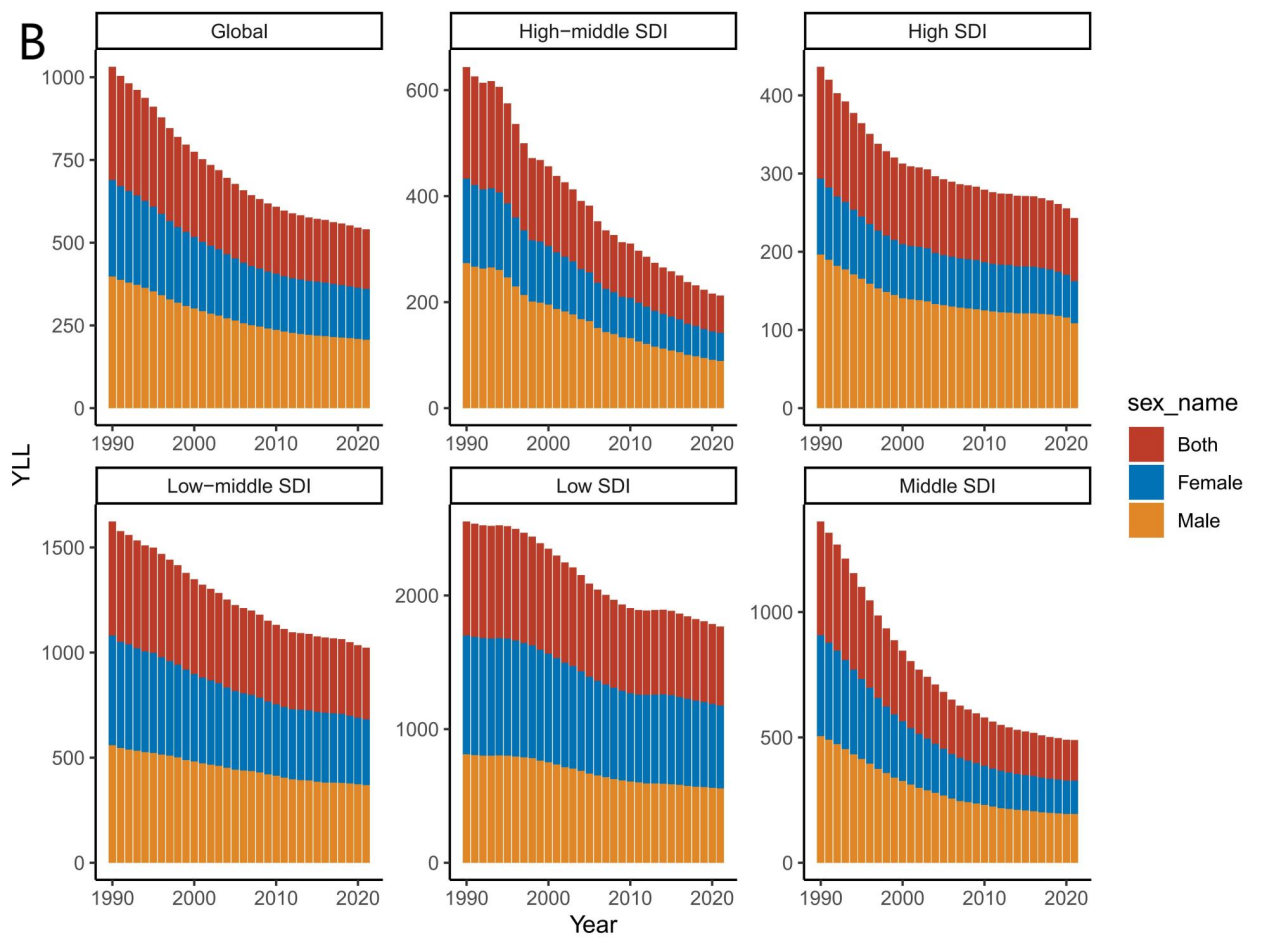


Fig 4：Sex- and age-specific cardiovascular disease attributable to a diet low in vegetables globally in 1990 and 2021.（A）Sex- and age-specific cardiovascular disease mortality attributable to a diet low in vegetables globally in 1990.（B）Sex- and age-specific cardiovascular disease mortality attributable to a diet low in vegetables globally in 2021.（C）Sex- and age-specific cardiovascular disease DALY attributable to a diet low in vegetables globally in 1990.（D）Sex- and age-specific cardiovascular disease DALY attributable to a diet low in vegetables globally in 2021.


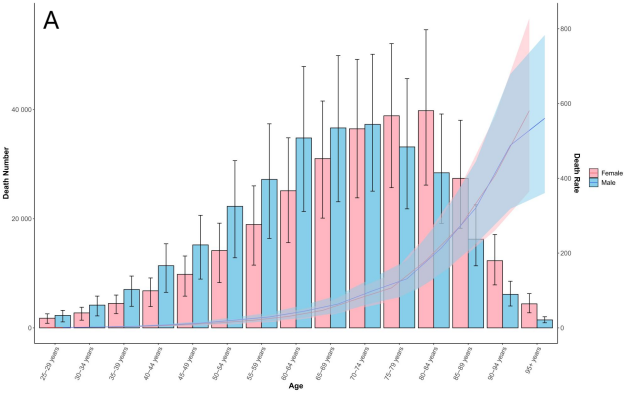

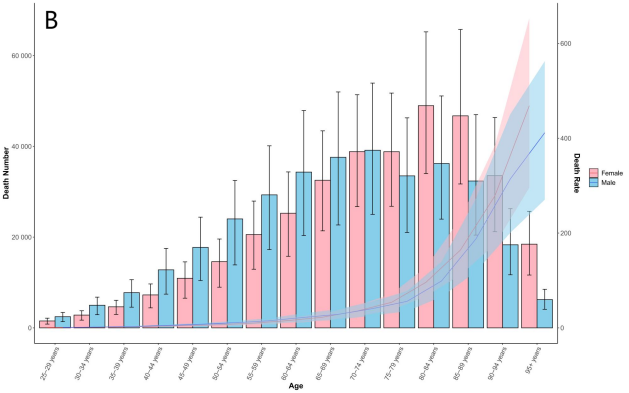

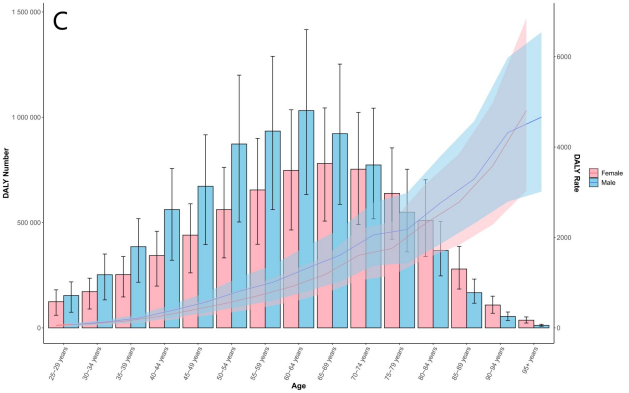

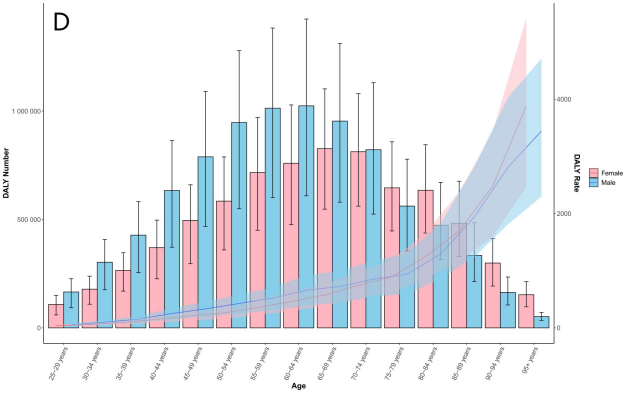


Fig 5：Disease-specific death attributable to a diet low in vegetables by age and sex globally in 1990 and 2021.（A）Disease-specific death number attributable to a diet low in vegetables by age and sex globally in 1990.（B）Disease-specific death number attributable to a diet low in vegetables by age and sex globally in 2021.（C）Disease-specific death rate attributable to a diet low in vegetables by age and sex globally in 1990.（D）Disease-specific death rate attributable to a diet low in vegetables by age and sex globally in 2021.


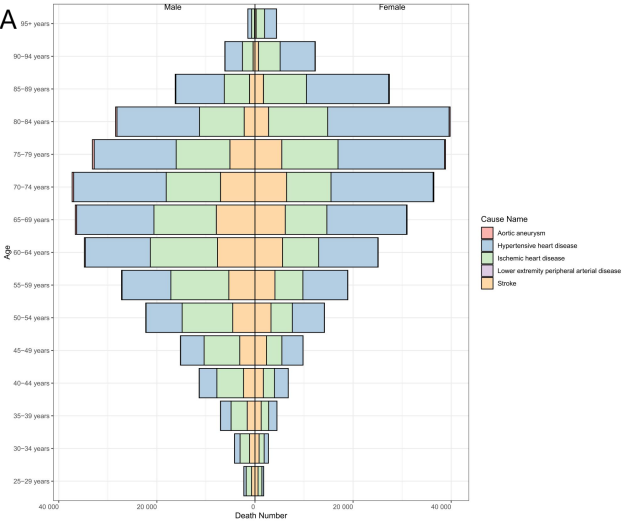

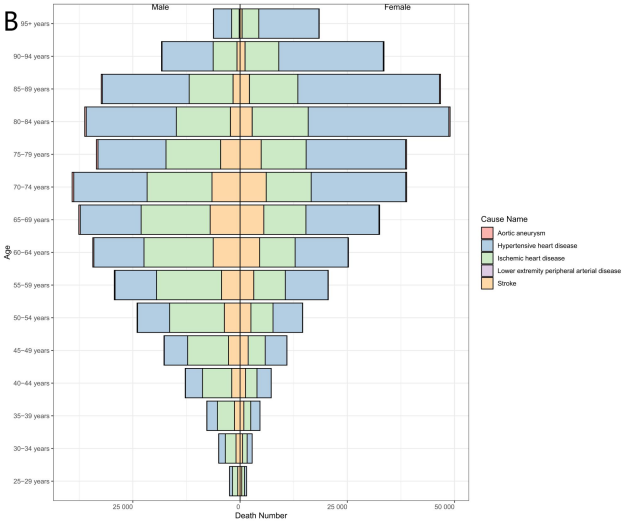


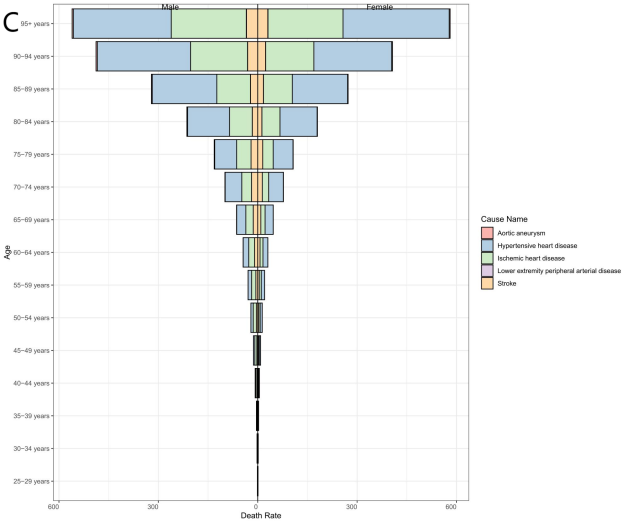

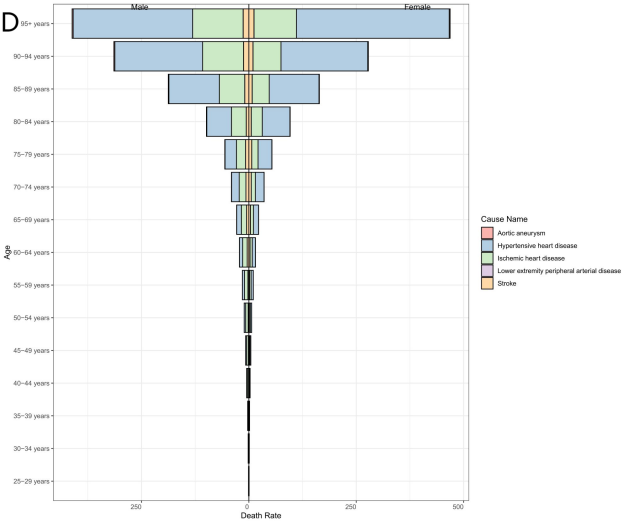


Fig 6：Disease-specific DALY attributable to a diet low in vegetables by age and sex globally in 1990 and 2021.（A）Disease-specific DALY number attributable to a diet low in vegetables by age and sex globally in 1990.（B）Disease-specific DALY number attributable to a diet low in vegetables by age and sex globally in 2021.（C）Disease-specific DALY rate attributable to a diet low in vegetables by age and sex globally in 1990.（B）Disease-specific DALY rate attributable to a diet low in vegetables by age and sex globally in 2021.


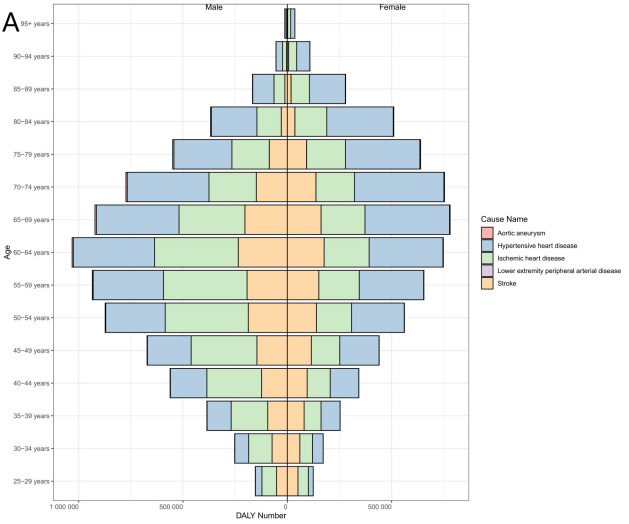

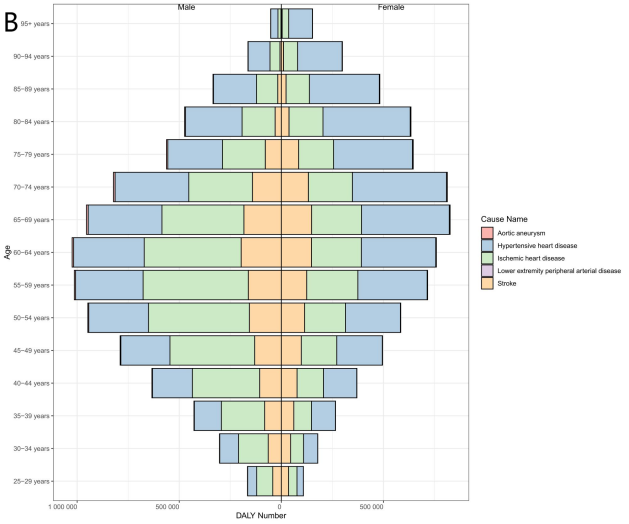


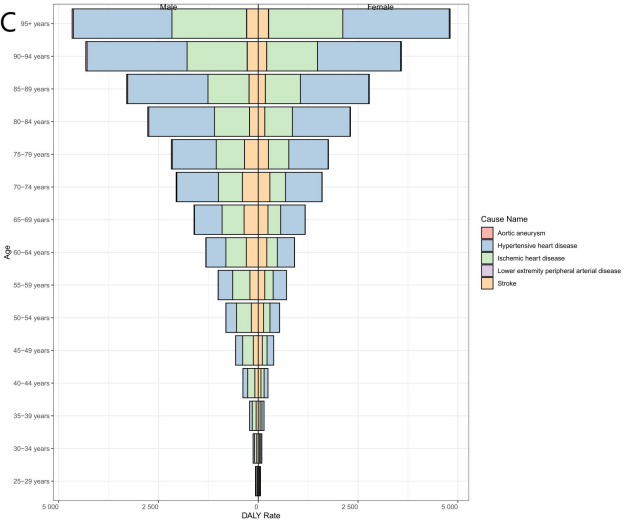

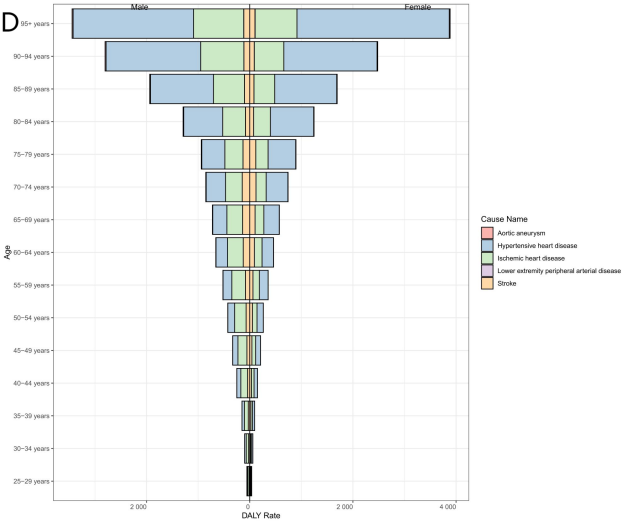


Fig 7：Proportion of disease-specific death attributable to a diet low in vegetables by age group in 1990 and 2021.（A）Proportion of disease-specific death number attributable to a diet low in vegetables by age group in 1990.（B）Proportion of disease-specific death number attributable to a diet low in vegetables by age group in 2021.（C）Proportion of disease-specific death rate attributable to a diet low in vegetables by age group in 1990.（D）Proportion of disease-specific death rate attributable to a diet low in vegetables by age group in 2021.


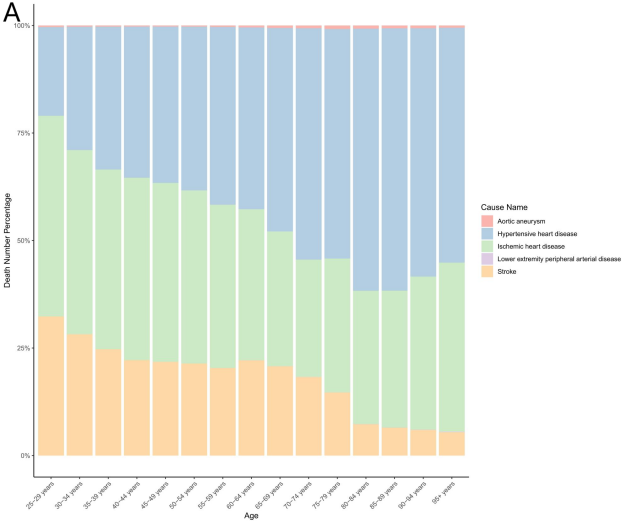

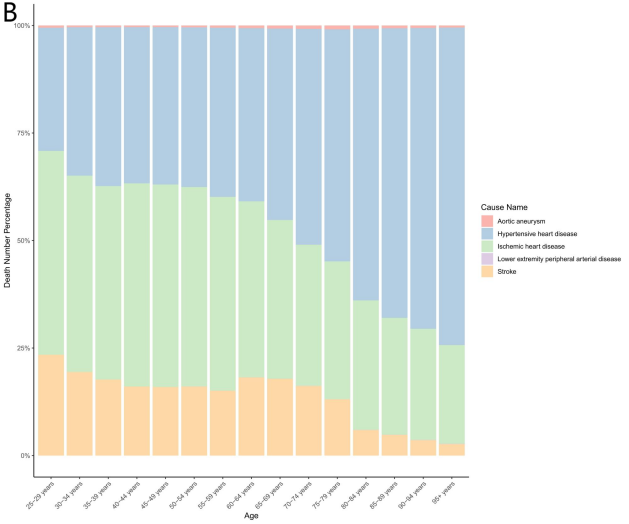


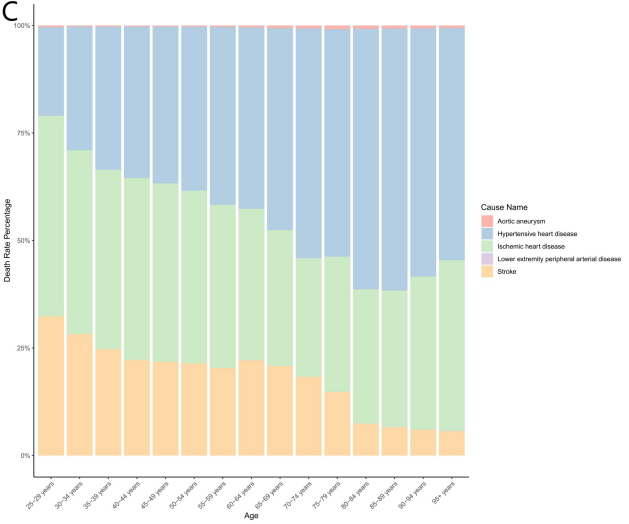

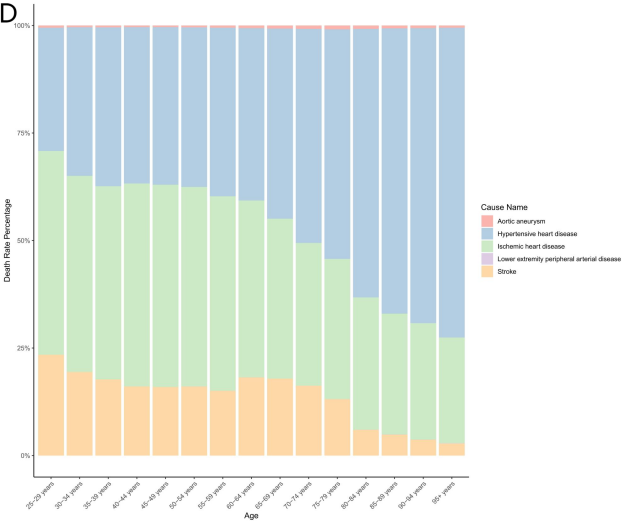


Fig 8：Proportion of disease-specific DALY attributable to a diet low in vegetables by age group in 1990 and 2021.（A）Proportion of disease-specific DALY number attributable to a diet low in vegetables by age group in 1990.（B）Proportion of disease-specific DALY number attributable to a diet low in vegetables by age group in 2021.（C）Proportion of disease-specific DALY rate attributable to a diet low in vegetables by age group in 1990.（D）Proportion of disease-specific DALY rate attributable to a diet low in vegetables by age group in 2021.


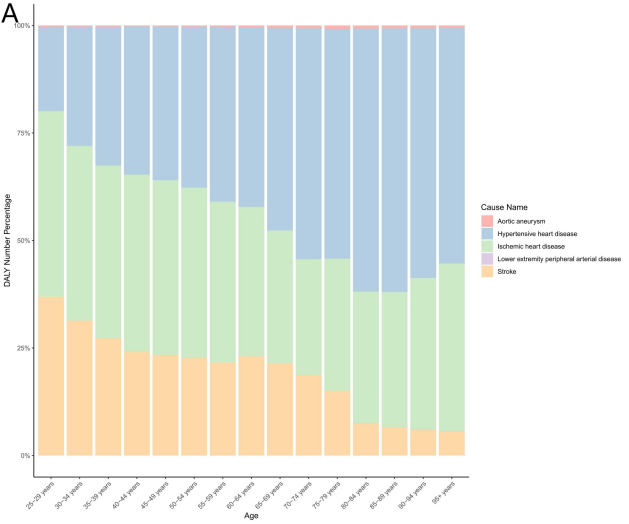

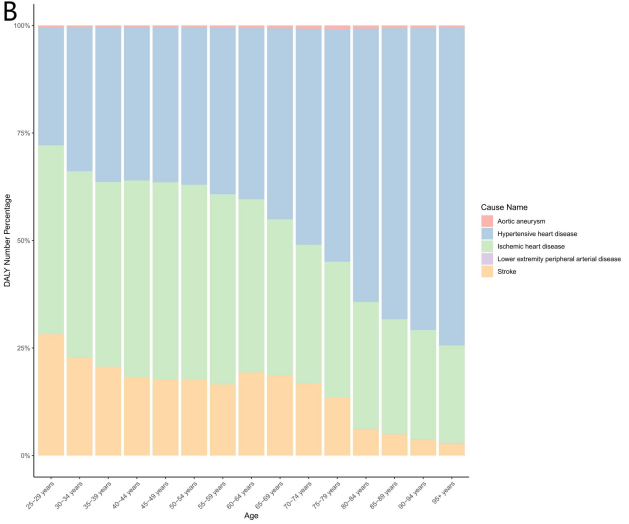

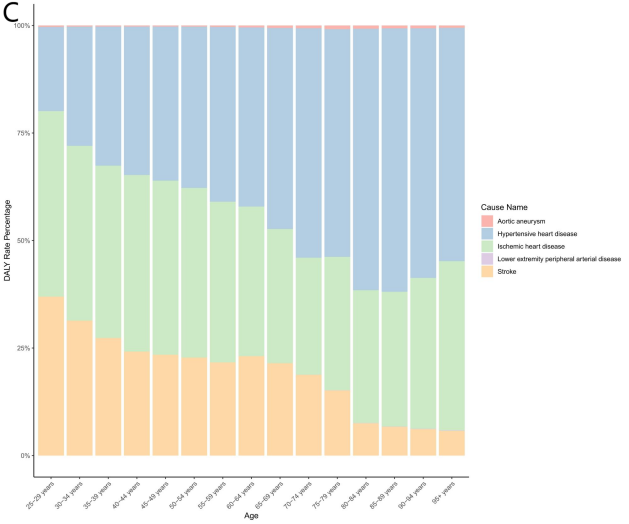

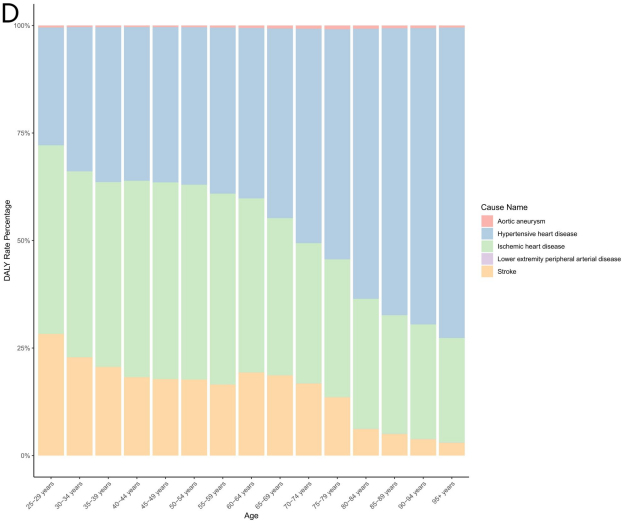


Fig 9：Projected cardiovascular disease death number attributable to a diet low in vegetables by gender and age from 1990 to 2035.（A）Projected cardiovascular disease death number attributable to a diet low in vegetables from 1990 to 2035.（B）Projected male cardiovascular disease death number attributable to a diet low in vegetables from 1990 to 2035.（C）Projected female cardiovascular disease death number attributable to a diet low in vegetables from 1990 to 2035.


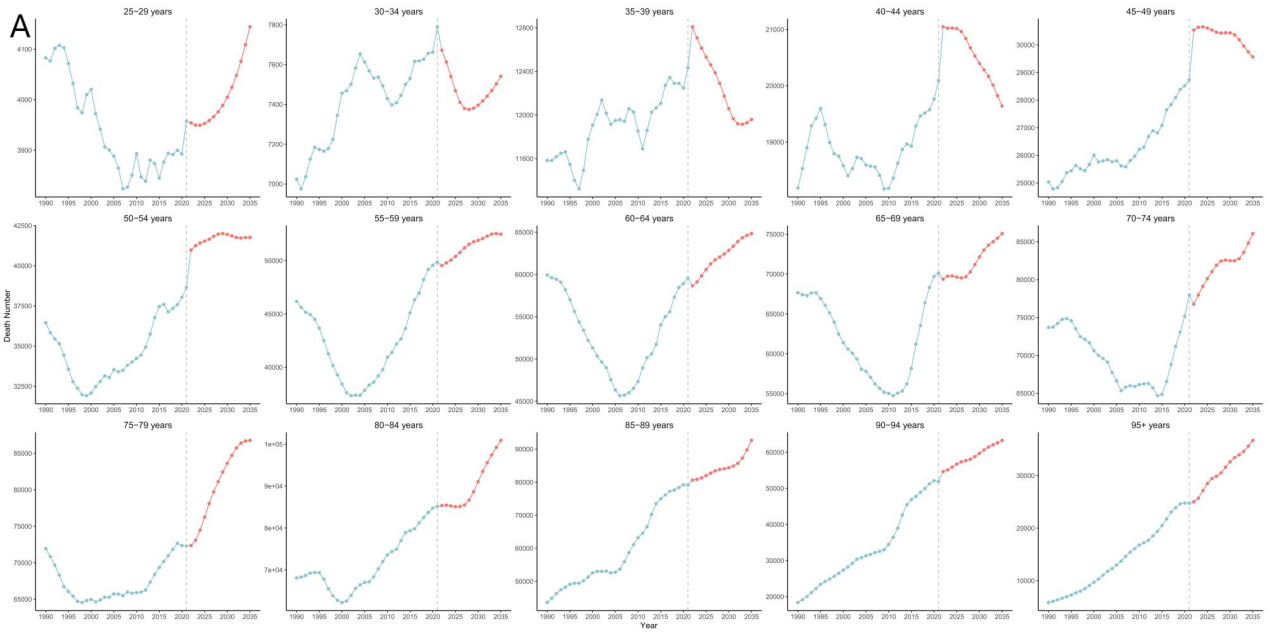


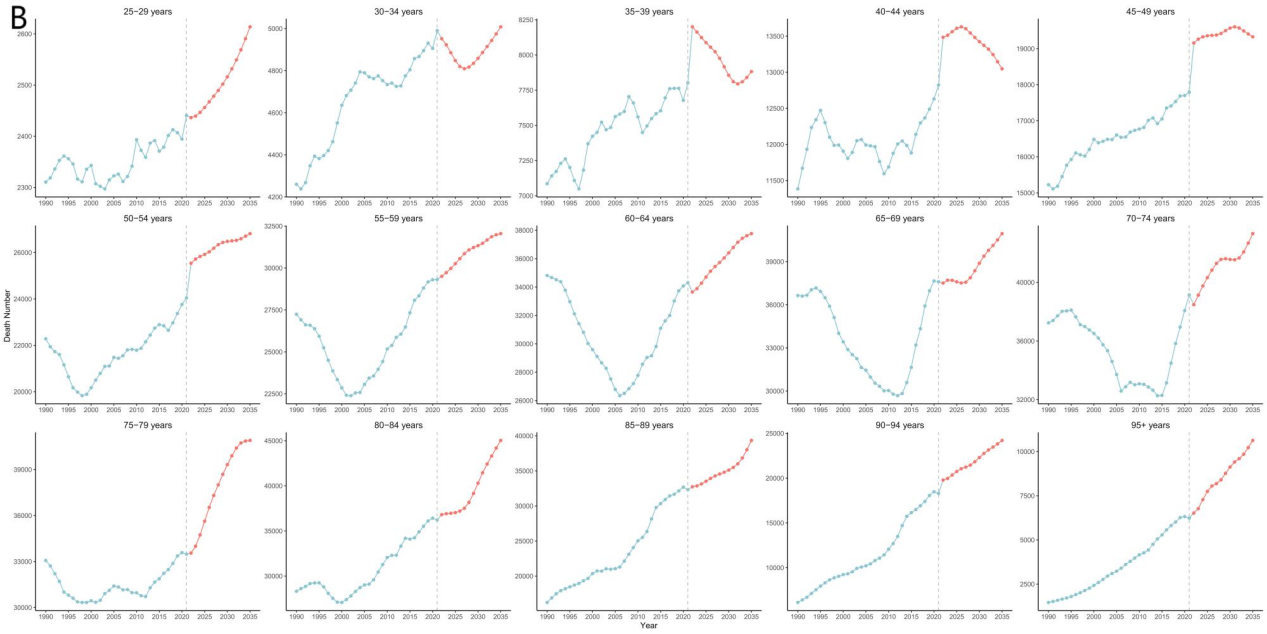

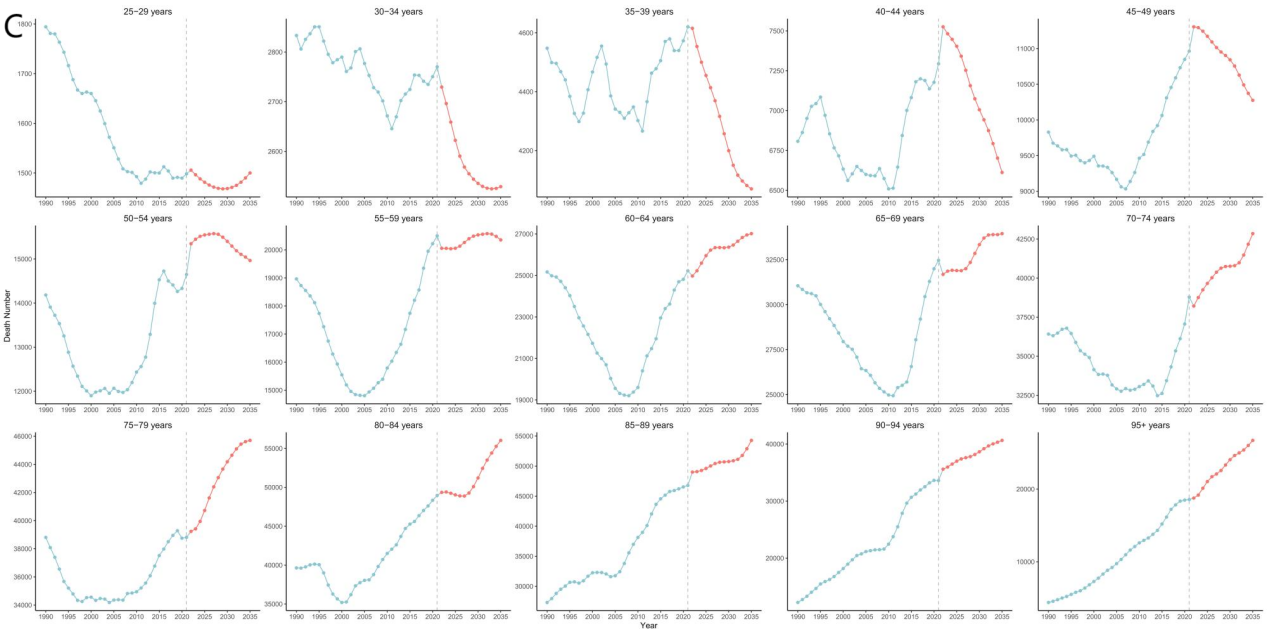


Fig 10：Projected cardiovascular disease death rate attributable to a diet low in vegetables by gender and age from 1990 to 2035.（A）Projected cardiovascular disease death rate attributable to a diet low in vegetables from 1990 to 2035.（B）Projected male cardiovascular disease death rate attributable to a diet low in vegetables from 1990 to 2035.（C）Projected female cardiovascular disease death rate attributable to a diet low in vegetables from 1990 to 2035.


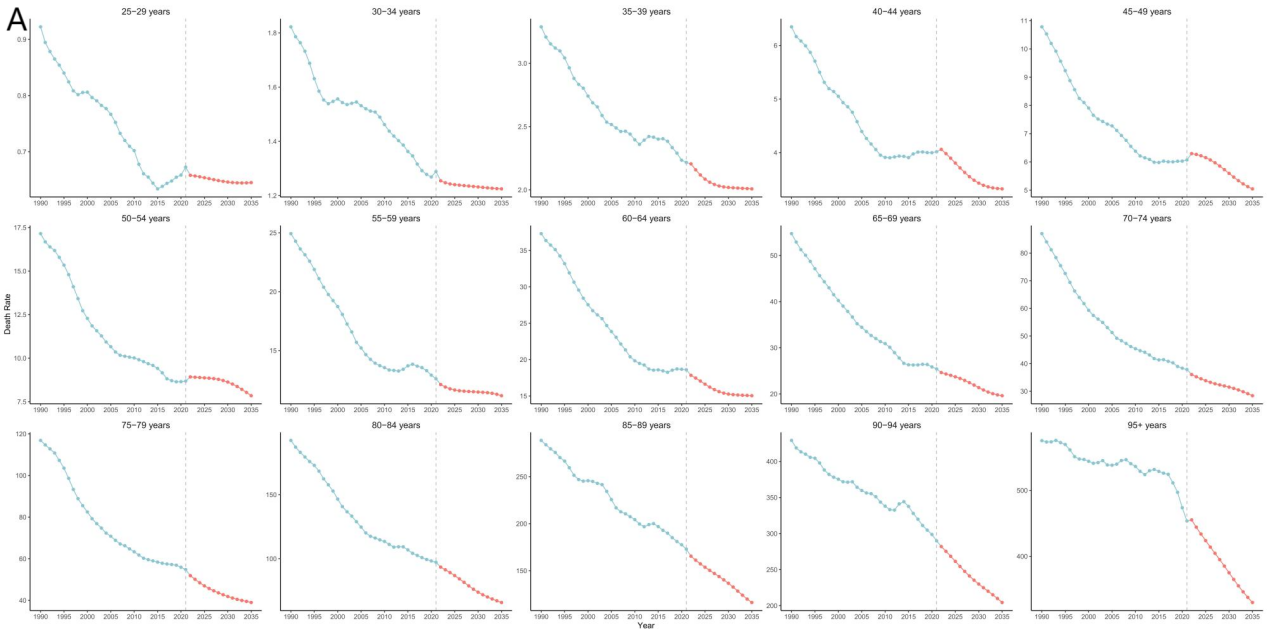


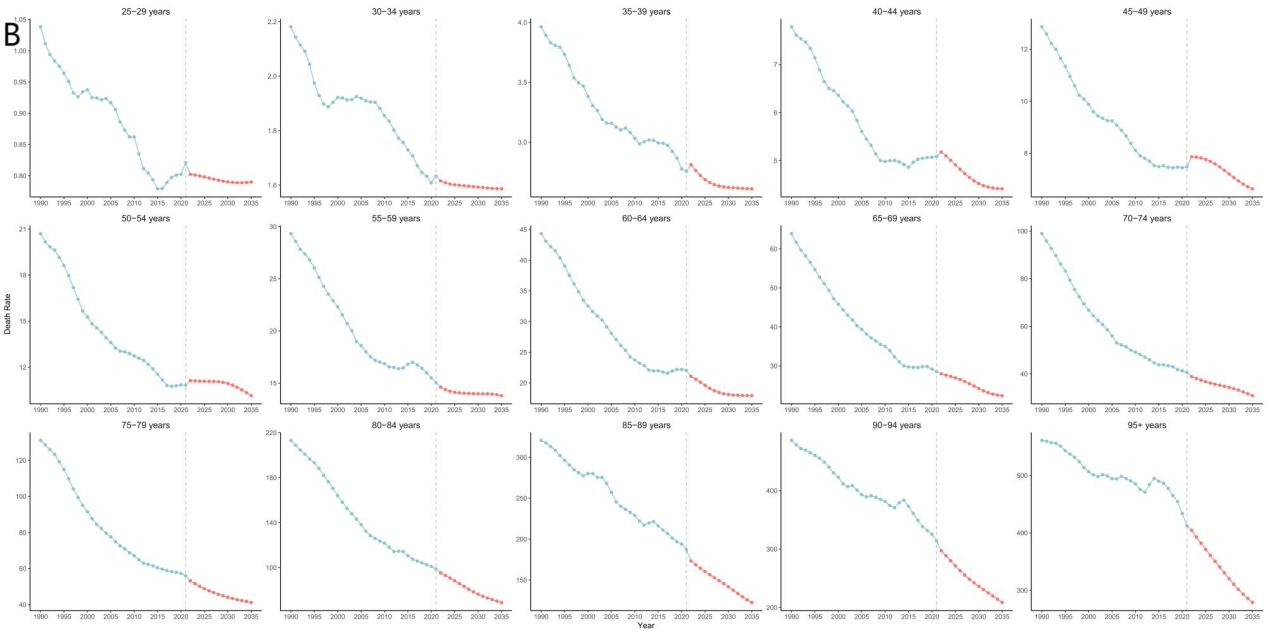


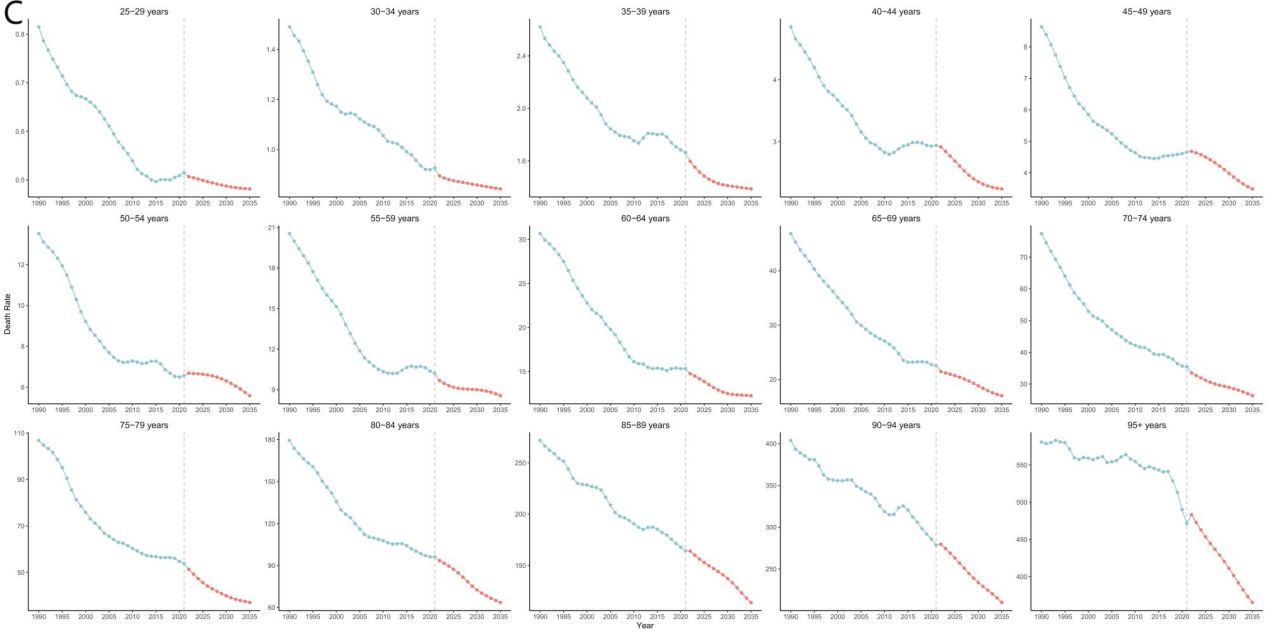


Fig 11：Projected cardiovascular disease mortality attributable to a diet low in vegetables by gender from 1990 to 2035.（A）Projected male cardiovascular disease mortality attributable to suboptimal vegetable intake from 1990 to 2035.（B）Projected female cardiovascular disease mortality attributable to suboptimal vegetable intake from 1990 to 2035.


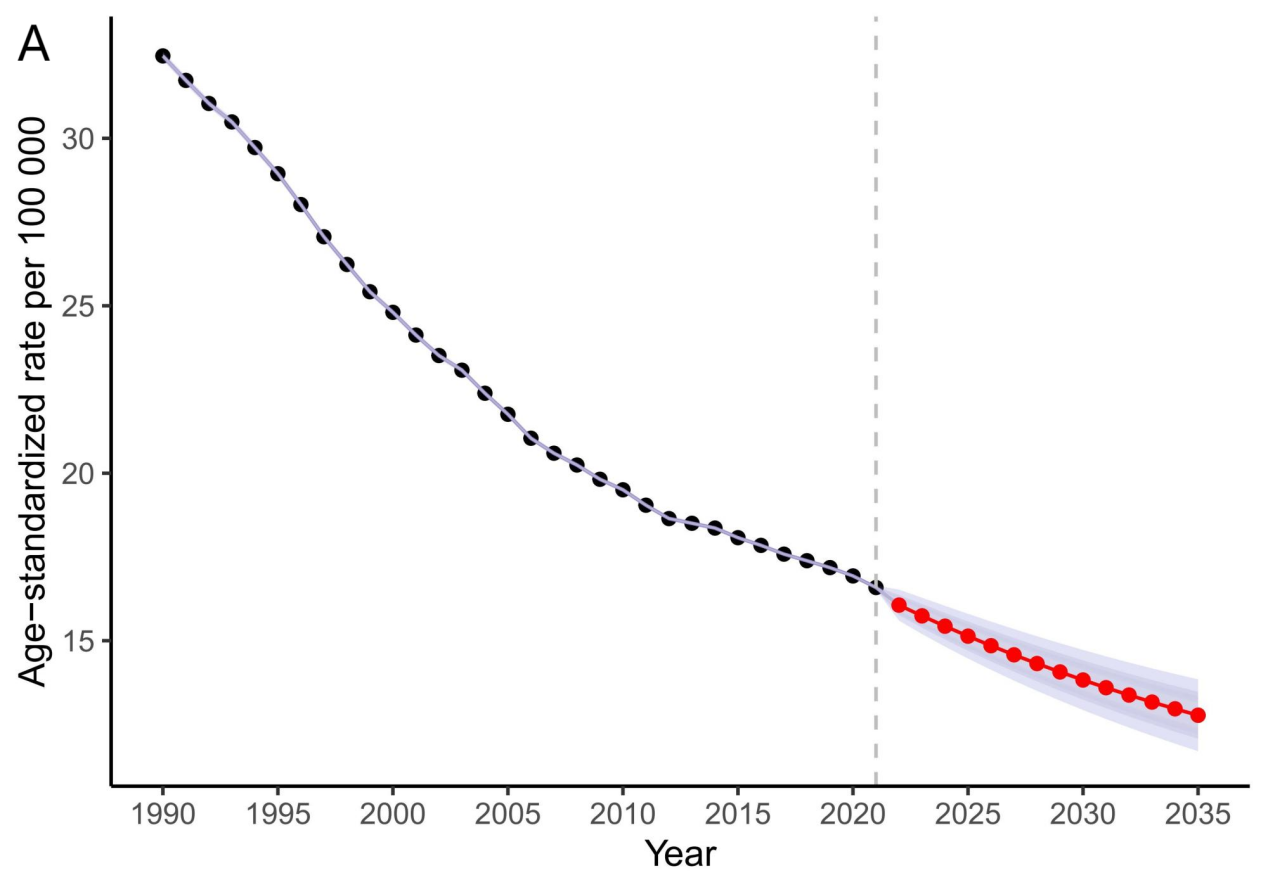

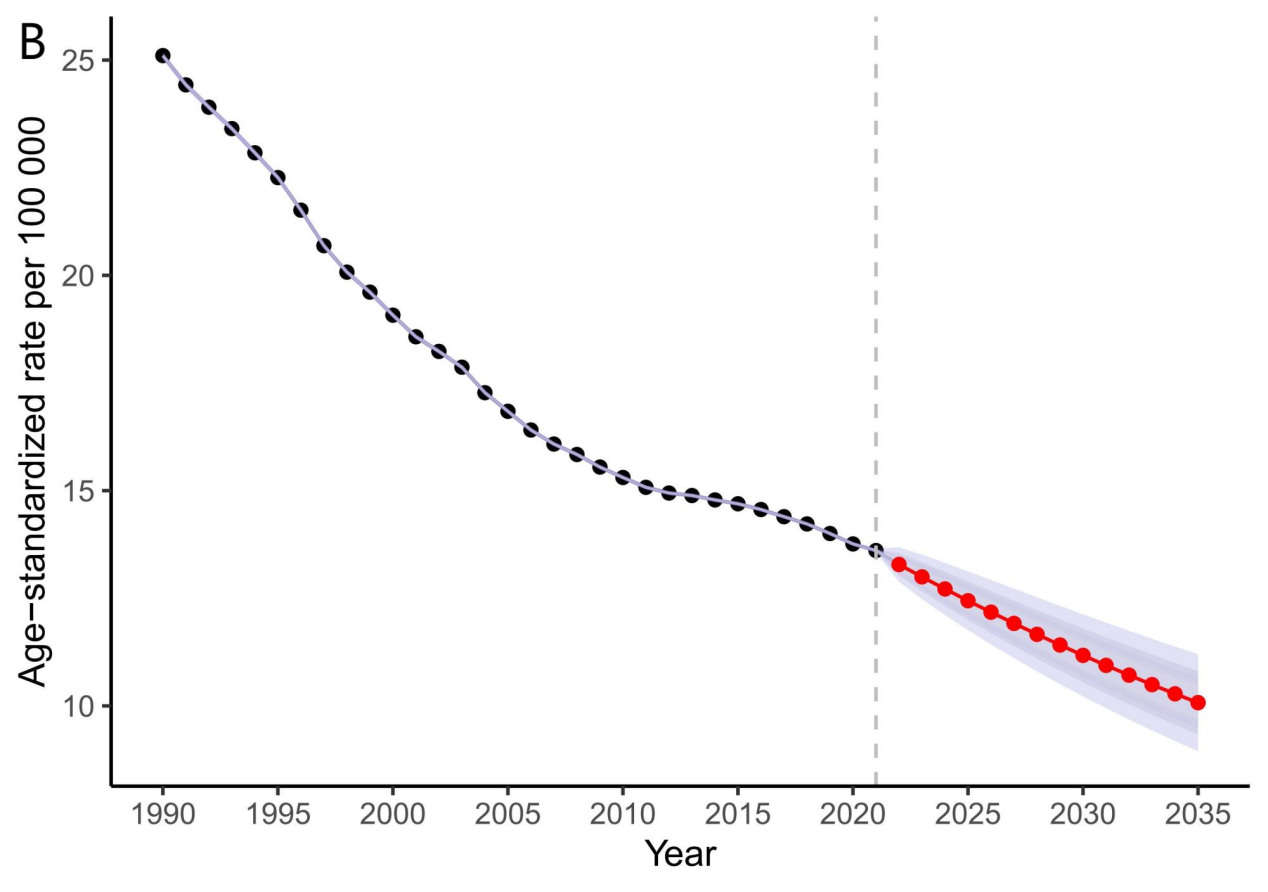

Supplement: Supplementary file 1 [file f10ca9fe61ad33c9174e68d0.docx]
